# Supplementary material for: Protective effect of provitamin A dietary carotenoid intake on overweight/obesity and their relation to inflammatory and oxidative stress biomarkers – a case-control study
Source: Royal Society of Chemistry journal article supplement (doi:10.1039/d3fo05648a), 2024-01-01
Supplement: d3fo05648a1.pdf [file d3fo05648a1.pdf]

## Supplementary Tables

Received 00th January 20xx,  
Accepted 00th January 20xx

DOI: 10.1039/x0xx00000x

### **Protective effect of Provitamin A Dietary Carotenoid Intake on Overweight/Obesity and their relation to Inflammatory and Oxidative Stress Biomarkers - A Case-Control Study**

Natália Koós<sup>a</sup>, Farhad Vahid<sup>a</sup>, Torsten Bohn<sup>a\*</sup>

---

<sup>a</sup> *Nutrition and Health Research Group, Department of Precision Health, Luxembourg Institute of Health, Strassen, Luxembourg.*

\* *Correspondence: [Torsten.Bohn@lih.lu](mailto:Torsten.Bohn@lih.lu)*

† *Footnotes relating to the title and/or authors should appear here.*

*Electronic Supplementary Information (ESI) available: [details of any supplementary information available should be included here]. See DOI: 10.1039/x0xx00000x*

## Supplementary Tables

**Supplementary Table 1:** Study Population Characteristics - Sociodemographic Variables in Overweight/Obese and Normal-Weight Groups Defined by BSA<sup>†</sup> (n=1605)\*<sup>1</sup>.

|                                  | Normal Weight (n = 787) | Overweight/Obese (n = 818) | p-value**        |
|----------------------------------|-------------------------|----------------------------|------------------|
| Age (years)                      | 48.40 (20.76)           | 48.50 (19.75)              | 0.906            |
| BMI (kg/m <sup>2</sup> )         | 22.70 (4.09)            | 26.63 (4.48)               | <b>&lt;0.001</b> |
| Sex (M/F)                        | 537/250                 | 261/557                    | <b>&lt;0.001</b> |
| <b>Education</b>                 |                         |                            |                  |
| Diploma/ low literate            | 534                     | 536                        | 0.323            |
| Higher than diploma              | 253                     | 282                        |                  |
| <b>Marital Status</b>            |                         |                            |                  |
| Single                           | 143                     | 130                        | 0.377            |
| Married                          | 591                     | 624                        |                  |
| Other                            | 53                      | 64                         |                  |
| <b>Regular physical activity</b> |                         |                            |                  |
| Yes                              | 215                     | 182                        | <b>0.019</b>     |
| No                               | 572                     | 636                        |                  |
| <b>Smoking status</b>            |                         |                            |                  |
| Yes                              | 125                     | 136                        | 0.687            |
| No                               | 662                     | 682                        |                  |
| <b>History of CVD</b>            |                         |                            |                  |
| Yes                              | 137                     | 176                        | <b>0.038</b>     |
| No                               | 650                     | 642                        |                  |
| <b>History of diabetes</b>       |                         |                            |                  |
| Yes                              | 213                     | 223                        | 0.929            |
| No                               | 574                     | 595                        |                  |
| <b>History of hypertension</b>   |                         |                            |                  |
| Yes                              | 366                     | 461                        | <b>&lt;0.001</b> |
| No                               | 421                     | 357                        |                  |

\*For continuous variables, median (IQR) values are shown. For categorical variables, frequencies are displayed.

<sup>†</sup>BSA-based classification considered participants normal weight if BSA was  $\leq 1.91$  m<sup>2</sup> and  $\leq 1.71$  m<sup>2</sup> for men and women, respectively.

\*\*Two-sided p-values were derived from chi-square tests for categorical variables and Mann-Whitney U-test for continuous variables.

Significant p-values ( $p < 0.05$ ) are shown in **bold**.

Abbreviations: BSA = body surface area, BMI = body mass index, M = male, F = female, CVD = cardiovascular disease.

- Vahid, F., D. Rahmani, and S.H. Davoodi, The correlation between serum inflammatory, antioxidant, glucose handling biomarkers, and Dietary Antioxidant Index (DAI) and the role of DAI in obesity/overweight causation: a population-based case-control study. *Int J Obes (Lond)*, 2021. 45(12): p. 2591-2599.

**Supplementary Table 2:** Dietary intake of fruits, vegetables, and total energy and carotenoids intake ( $\mu\text{g}/1000$  kcal/day) of the study population ( $n=1605$ )\*.

|                                                                     | Total<br>(n = 1605) | Overweight/<br>Obesity***<br>(n = 851) | Normal<br>Weight***<br>(n = 754) | p-value <sup>†</sup> | Male<br>(n = 798) | Female<br>(n = 807) | p-value <sup>†</sup> |
|---------------------------------------------------------------------|---------------------|----------------------------------------|----------------------------------|----------------------|-------------------|---------------------|----------------------|
| <b>Total energy intake (kcal/day)</b>                               | 2828 (784)          | 2863 (803)                             | 2786 (790)                       | <b>0.028</b>         | 2832 (841)        | 2824 (731)          | 0.657                |
| <b>Fruits (g/day)</b>                                               | 410 (149)           | 414 (151)                              | 408 (151)                        | 0.795                | 408 (150)         | 410 (153)           | 0.366                |
| <b>Vegetables (g/day)</b>                                           | 382 (180)           | 372 (171)                              | 400 (188.81)                     | <b>&lt;0.001</b>     | 382 (189)         | 382 (180)           | 0.586                |
| <b>Carotenoid Intake (<math>\mu\text{g}/1000</math> kcal/day)**</b> |                     |                                        |                                  |                      |                   |                     |                      |
| <b><math>\alpha</math>-Carotene</b>                                 | 1246 (1322)         | 1163 (1229)                            | 1332 (1386)                      | <b>0.006</b>         | 1204 (1295)       | 1287 (1360)         | 0.184                |
| <b><math>\beta</math>-Carotene</b>                                  | 3390 (2511)         | 3230 (2278)                            | 3523 (2702)                      | <b>0.004</b>         | 3410 (2525)       | 3386 (2492)         | 0.864                |
| <b><math>\beta</math>-Cryptoxanthin</b>                             | 92.21 (57.80)       | 92 (53)                                | 92 (60)                          | 0.620                | 93.89 (58.12)     | 90.17 (56.76)       | 0.250                |
| <b><math>\Sigma</math>Provitamin A</b>                              | 4747 (3713)         | 4484 (3508)                            | 5089 (3779)                      | <b>&lt;0.001</b>     | 4736 (3728)       | 4766 (3696)         | 0.670                |
| <b>Lutein + Zeaxanthin</b>                                          | 689 (460)           | 666 (459)                              | 710 (474)                        | <b>0.008</b>         | 683 (438)         | 697 (469)           | 0.216                |
| <b>Lycopene</b>                                                     | 1735 (1490)         | 1724 (1464)                            | 1758 (1497)                      | 0.786                | 1710 (1353)       | 1748 (1679)         | 0.075                |
| <b>Phytoene</b>                                                     | 2715 (1574)         | 2683 (1539)                            | 2762 (1689)                      | 0.108                | 2746 (1619)       | 2664 (1552)         | 0.149                |
| <b>Phytofluene</b>                                                  | 918 (529)           | 915 (490)                              | 929 (570)                        | 0.162                | 927 (554)         | 909 (509)           | 0.149                |
| <b>Violaxanthin</b>                                                 | 544 (267)           | 530 (260)                              | 562 (273)                        | <b>0.002</b>         | 540 (266)         | 547 (270)           | 0.400                |
| <b>Neoxanthin</b>                                                   | 144 (77.85)         | 141 (76)                               | 150 (79)                         | <b>0.010</b>         | 142 (76)          | 145 (78)            | 0.322                |
| <b>Astaxanthin</b>                                                  | 0.95 (2.62)         | 0.87 (2.45)                            | 1.07 (2.74)                      | <b>0.001</b>         | 0.95 (2.67)       | 0.94 (2.56)         | 0.729                |
| <b><math>\Sigma</math>Non-Provitamin A</b>                          | 7031 (3693)         | 6967 (3533)                            | 7098 (3865)                      | 0.183                | 6969 (3767)       | 7145 (3616)         | 0.603                |
| <b><math>\Sigma</math>Total Carotenoids</b>                         | 12324 (6834)        | 11970 (6446)                           | 12639 (7083)                     | <b>0.009</b>         | 12371 (6858)      | 12269 (6796)        | 0.677                |

\*Due to the non-normal distribution of the data, median (interquartile range) values are displayed.

\*\*Carotenoid intakes are adjusted for daily energy intake.

\*\*\*Groups of overweight/obese and normal weight are determined based on BMI, where normal-weight status is defined as BMI <25 kg/m<sup>2</sup> and overweight/obesity is defined as BMI  $\geq$ 25kg/m<sup>2</sup>.

<sup>†</sup>Two-sided p-values were derived from nonparametric Mann-Whitney U-tests.

Statistically significant p-values ( $p < 0.05$ ) are shown in **bold**.

**Supplementary Table 3.** Dietary intake of total carotenoid intake<sup>†</sup> of the study population (n=1605)\*.

|                                     | Total<br>(n = 1605) | Overweight/<br>Obese |                            | p-<br>value** | Male<br>(n = 798) | Female<br>(n = 807) | p-value** |
|-------------------------------------|---------------------|----------------------|----------------------------|---------------|-------------------|---------------------|-----------|
|                                     |                     | Obese<br>(n = 851)   | Normal Weight<br>(n = 754) |               |                   |                     |           |
| <b>α-Carotene (μg/day)</b>          | 3704 (3392)         | 3525 (3418)          | 3762 (3494)                | <b>0.028</b>  | 3531 (3306)       | 3739 (3538)         | 0.173     |
| <b>β-Carotene (μg/day)</b>          | 9647 (6158)         | 9502 (5537)          | 9989 (6556)                | <b>0.031</b>  | 9647 (6059)       | 9644 (6347)         | 0.801     |
| <b>β-Cryptoxanthin (μg/day)</b>     | 265 (133)           | 266 (131)            | 265 (138)                  | 0.571         | 273 (135)         | 262 (128)           | 0.092     |
| <b>Σ Provitamin A (μg/day)</b>      | 14257 (8757)        | 13512 (8835)         | 14680 (9209)               | <b>0.004</b>  | 14164 (8445)      | 14310 (8932)        | 0.620     |
| <b>Lutein + zeaxanthin (μg/day)</b> | 1992 (1100)         | 1971 (1127)          | 2012 (1109)                | 0.115         | 1988 (1055)       | 1999 (1181)         | 0.298     |
| <b>Lycopene (μg/day)</b>            | 5093 (4051)         | 5187 (4072)          | 4915 (4078)                | 0.232         | 4846 (3728)       | 5187 (4455)         | 0.057     |
| <b>Phytoene (μg/day)</b>            | 7656 (3574)         | 7611 (3552)          | 7665 (3713)                | 0.503         | 7730 (4135)       | 7608 (3484)         | 0.090     |
| <b>Phytofluene (μg/day)</b>         | 2598 (1236)         | 2594 (1234)          | 2599 (1245)                | 0.657         | 2622 (1297)       | 2591 (1153)         | 0.088     |
| <b>Violaxanthin (μg/day)</b>        | 1575 (674)          | 1551 (651)           | 1594 (669)                 | 0.065         | 1563 (607)        | 1584 (719)          | 0.556     |
| <b>Neoxanthin (μg/day)</b>          | 402 (193)           | 402 (194)            | 409 (195)                  | 0.175         | 400 (189)         | 411 (193)           | 0.394     |
| <b>Astaxanthin (μg/day)</b>         | 2.50 (8.65)         | 2.50 (8.65)          | 3.75 (7.50)                | <b>0.003</b>  | 2.50 (8.65)       | 2.50 (8.65)         | 0.669     |
| <b>Σ Non-provitamin A (μg/day)</b>  | 19425 (8147)        | 19425 (8034)         | 19421 (8322)               | 0.991         | 19418 (8192)      | 19622 (8151)        | 0.605     |
| <b>Σ Total carotenoids (μg/day)</b> | 34184 (16615)       | 33776 (15896)        | 35082 (17424)              | 0.071         | 34114. (17053)    | 34378 (15452)       | 0.559     |

\*Due to the non-normal distribution of the data, median (IQR) values are displayed. Groups of overweight/obese and normal weight are determined based on BMI, where normal-weight status is defined as BMI <25 kg/m<sup>2</sup> and overweight/obesity is defined as BMI ≥25 kg/m<sup>2</sup>.

\*\*Two-sided p-values were derived from nonparametric Mann-Whitney U-tests. Statistically significant p-values (p <0.05) are shown in **bold**.

<sup>†</sup> Not adjusted for energy intake values.

## Supplementary Tables

**Supplementary Table 4:** Spearman rank correlations between the intake of carotenoids, total energy intake, and vegetables and fruits\*.

|                            | Total Carotenoid Intake ( $\mu\text{g}/\text{day}$ ) |              |                    |                   |                |                   | Carotenoids Intake Adjusted for Daily Energy Intake ( $\mu\text{g}/1000 \text{ kcal}$ ) |                   |                    |                   |                |                   |
|----------------------------|------------------------------------------------------|--------------|--------------------|-------------------|----------------|-------------------|-----------------------------------------------------------------------------------------|-------------------|--------------------|-------------------|----------------|-------------------|
|                            | Total Energy Intake (kcal/day)                       |              | Vegetables (g/day) |                   | Fruits (g/day) |                   | Total Energy Intake (kcal/day)                                                          |                   | Vegetables (g/day) |                   | Fruits (g/day) |                   |
|                            | $r_s$                                                | p-value      | $r_s$              | p-value           | $r_s$          | p-value           | $r_s$                                                                                   | p-value           | $r_s$              | p-value           | $r_s$          | p-value           |
| $\alpha$ -Carotene         | -0.064                                               | <b>0.010</b> | 0.239              | <b>&lt; 0.001</b> | -0.019         | 0.435             | -0.311                                                                                  | <b>&lt; 0.001</b> | 0.228              | <b>&lt; 0.001</b> | -0.011         | 0.645             |
| $\beta$ -Carotene          | -0.057                                               | <b>0.023</b> | 0.294              | <b>&lt; 0.001</b> | 0.118          | <b>&lt; 0.001</b> | -0.411                                                                                  | <b>&lt; 0.001</b> | 0.272              | <b>&lt; 0.001</b> | 0.111          | <b>&lt; 0.001</b> |
| $\beta$ -Cryptoxanthin     | -0.013                                               | 0.590        | 0.103              | <b>&lt; 0.001</b> | 0.520          | <b>&lt; 0.001</b> | -0.447                                                                                  | <b>&lt; 0.001</b> | 0.095              | <b>&lt; 0.001</b> | 0.473          | <b>&lt; 0.001</b> |
| Lutein + zeaxanthin        | -0.078                                               | <b>0.002</b> | 0.249              | <b>&lt; 0.001</b> | 0.325          | <b>&lt; 0.001</b> | -0.467                                                                                  | <b>&lt; 0.001</b> | 0.230              | <b>&lt; 0.001</b> | 0.290          | <b>&lt; 0.001</b> |
| Lycopene                   | -0.028                                               | 0.258        | 0.448              | <b>&lt; 0.001</b> | 0.055          | <b>0.028</b>      | -0.349                                                                                  | <b>&lt; 0.001</b> | 0.428              | <b>&lt; 0.001</b> | 0.062          | <b>0.012</b>      |
| Phytoene                   | -0.047                                               | 0.060        | 0.373              | <b>&lt; 0.001</b> | 0.588          | <b>&lt; 0.001</b> | -0.522                                                                                  | <b>&lt; 0.001</b> | 0.322              | <b>&lt; 0.001</b> | 0.500          | <b>&lt; 0.001</b> |
| Phytofluene                | -0.053                                               | <b>0.032</b> | 0.366              | <b>&lt; 0.001</b> | 0.587          | <b>&lt; 0.001</b> | -0.531                                                                                  | <b>&lt; 0.001</b> | 0.311              | <b>&lt; 0.001</b> | 0.499          | <b>&lt; 0.001</b> |
| Violaxanthin               | -0.014                                               | 0.577        | 0.358              | <b>&lt; 0.001</b> | 0.082          | <b>0.001</b>      | -0.551                                                                                  | <b>&lt; 0.001</b> | 0.288              | <b>&lt; 0.001</b> | 0.088          | <b>&lt; 0.001</b> |
| Neoxanthin                 | -0.036                                               | 0.150        | 0.398              | <b>&lt; 0.001</b> | 0.133          | <b>&lt; 0.001</b> | -0.543                                                                                  | <b>&lt; 0.001</b> | 0.326              | <b>&lt; 0.001</b> | 0.121          | <b>&lt; 0.001</b> |
| Astaxanthin                | -0.003                                               | 0.900        | 0.017              | 0.498             | -0.043         | 0.083             | -0.196                                                                                  | <b>&lt; 0.001</b> | 0.022              | 0.379             | -0.046         | 0.067             |
| $\Sigma$ Provitamin A      | -0.062                                               | <b>0.012</b> | 0.275              | <b>&lt; 0.001</b> | 0.080          | <b>&lt; 0.001</b> | -0.398                                                                                  | <b>&lt; 0.001</b> | 0.256              | <b>&lt; 0.001</b> | 0.078          | <b>&lt; 0.001</b> |
| $\Sigma$ Non-provitamin A  | -0.061                                               | <b>0.015</b> | 0.529              | <b>&lt; 0.001</b> | 0.462          | <b>&lt; 0.001</b> | -0.575                                                                                  | <b>&lt; 0.001</b> | 0.436              | <b>&lt; 0.001</b> | 0.383          | <b>&lt; 0.001</b> |
| $\Sigma$ Total carotenoids | -0.081                                               | <b>0.001</b> | 0.496              | <b>&lt; 0.001</b> | 0.293          | <b>&lt; 0.001</b> | -0.551                                                                                  | <b>&lt; 0.001</b> | 0.420              | <b>&lt; 0.001</b> | 0.246          | <b>&lt; 0.001</b> |

\*Spearman correlations were performed due to the non-normal distribution of the data. Spearman correlation coefficients ( $r_s$ ) and the corresponding two-sided p-values are displayed. Statistically significant p-values ( $p < 0.05$ ) are shown in **bold**.

## Supplementary Tables

Supplementary Table 5: Spearman rank correlations between individual carotenoids\*.

|                               | Total Carotenoid Intakes   |         |                             |         |                              |         |                       |         |                       |         |                            |         |                                |         |                     |         |                     |         |                        |         |                         |         |                       |         |
|-------------------------------|----------------------------|---------|-----------------------------|---------|------------------------------|---------|-----------------------|---------|-----------------------|---------|----------------------------|---------|--------------------------------|---------|---------------------|---------|---------------------|---------|------------------------|---------|-------------------------|---------|-----------------------|---------|
|                               | ΣProvitamin A              |         | ΣNon-provitamin A           |         | ΣTotal Carotenoids           |         | α-Carotene            |         | β-Carotene            |         | β-Cryptoxanthin            |         | Lutein + zeaxanthin            |         | Lycopene            |         | Phytoene            |         | Phytofluene            |         | Violaxanthin            |         | Neoxanthin            |         |
|                               | r <sub>s</sub>             | p-value | r <sub>s</sub>              | p-value | r <sub>s</sub>               | p-value | r <sub>s</sub>        | p-value | r <sub>s</sub>        | p-value | r <sub>s</sub>             | p-value | r <sub>s</sub>                 | p-value | r <sub>s</sub>      | p-value | r <sub>s</sub>      | p-value | r <sub>s</sub>         | p-value | r <sub>s</sub>          | p-value | r <sub>s</sub>        | p-value |
| β-Carotene                    | 0.978                      | <0.001  | 0.325                       | <0.001  | 0.875                        | <0.001  | 0.844                 | <0.001  |                       |         |                            |         |                                |         |                     |         |                     |         |                        |         |                         |         |                       |         |
| β-Cryptoxanthin               | 0.083                      | 0.001   | 0.393                       | <0.001  | 0.248                        | <0.001  | -0.006                | 0.823   | 0.099                 | <0.001  |                            |         |                                |         |                     |         |                     |         |                        |         |                         |         |                       |         |
| Lutein + zeaxanthin           | 0.184                      | <0.001  | 0.467                       | <0.001  | 0.394                        | <0.001  | 0.086                 | 0.001   | 0.222                 | <0.001  | 0.273                      | <0.001  |                                |         |                     |         |                     |         |                        |         |                         |         |                       |         |
| Lycopene                      | 0.048                      | 0.052   | 0.690                       | <0.001  | 0.390                        | <0.001  | 0.031                 | 0.215   | 0.059                 | 0.017   | 0.131                      | <0.001  | 0.102                          | <0.001  |                     |         |                     |         |                        |         |                         |         |                       |         |
| Phytoene                      | 0.317                      | <0.001  | 0.854                       | <0.001  | 0.666                        | <0.001  | 0.177                 | <0.001  | 0.372                 | <0.001  | 0.407                      | <0.001  | 0.296                          | <0.001  | 0.355               | <0.001  |                     |         |                        |         |                         |         |                       |         |
| Phytofluene                   | 0.374                      | <0.001  | 0.832                       | <0.001  | 0.699                        | <0.001  | 0.236                 | <0.001  | 0.428                 | <0.001  | 0.407                      | <0.001  | 0.295                          | <0.001  | 0.316               | <0.001  | 0.994               | <0.001  |                        |         |                         |         |                       |         |
| Violaxanthin                  | 0.035                      | 0.157   | 0.228                       | <0.001  | 0.156                        | <0.001  | -0.034                | 0.179   | 0.060                 | 0.016   | 0.318                      | <0.001  | 0.460                          | <0.001  | -0.031              | 0.215   | 0.066               | 0.008   | 0.063                  | 0.012   |                         |         |                       |         |
| Neoxanthin                    | 0.055                      | 0.029   | 0.206                       | <0.001  | 0.154                        | <0.001  | -0.003                | 0.889   | 0.080                 | 0.001   | 0.169                      | <0.001  | 0.456                          | <0.001  | -0.037              | 0.133   | 0.064               | 0.010   | 0.060                  | 0.015   | 0.867                   | <0.001  |                       |         |
| Astaxanthin                   | -0.050                     | 0.045   | -0.402                      | 0.094   | -0.055                       | 0.026   | -0.039                | 0.120   | -0.057                | 0.022   | -0.067                     | 0.007   | -0.034                         | 0.175   | 0.028               | 0.262   | -0.073              | 0.003   | -0.085                 | 0.001   | -0.053                  | 0.034   | -0.018                | 0.469   |
| ΣProvitamin A                 |                            |         | 0.273                       | <0.001  | 0.835                        | <0.001  | 0.923                 | <0.001  |                       |         |                            |         |                                |         |                     |         |                     |         |                        |         |                         |         |                       |         |
| ΣNon-provitamin A             | 0.273                      | <0.001  |                             |         | 0.714                        | <0.001  | 0.145                 | <0.001  |                       |         |                            |         |                                |         |                     |         |                     |         |                        |         |                         |         |                       |         |
| ΣTotal carotenoids            | 0.835                      | <0.001  | 0.714                       | <0.001  |                              |         | 0.699                 | <0.001  |                       |         |                            |         |                                |         |                     |         |                     |         |                        |         |                         |         |                       |         |
|                               | Adjusted for Energy Intake |         |                             |         |                              |         |                       |         |                       |         |                            |         |                                |         |                     |         |                     |         |                        |         |                         |         |                       |         |
|                               | ΣProvitamin A/1000 kcal    |         | ΣNon-Provitamin A/1000 kcal |         | ΣTotal Carotenoids/1000 kcal |         | α-Carotene/ 1000 kcal |         | β-Carotene/ 1000 kcal |         | β-Cryptoxanthin/ 1000 kcal |         | Lutein + zeaxanthin/ 1000 kcal |         | Lycopene/ 1000 kcal |         | Phytoene/ 1000 kcal |         | Phytofluene/ 1000 kcal |         | Violaxanthin/ 1000 kcal |         | Neoxanthin/ 1000 kcal |         |
|                               | r <sub>s</sub>             | p-value | r <sub>s</sub>              | p-value | r <sub>s</sub>               | p-value | r <sub>s</sub>        | p-value | r <sub>s</sub>        | p-value | r <sub>s</sub>             | p-value | r <sub>s</sub>                 | p-value | r <sub>s</sub>      | p-value | r <sub>s</sub>      | p-value | r <sub>s</sub>         | p-value | r <sub>s</sub>          | p-value | r <sub>s</sub>        | p-value |
| β-Carotene/1000 kcal          | 0.982                      | <0.001  | 0.486                       | <0.001  | 0.878                        | <0.001  | 0.860                 | <0.001  |                       |         |                            |         |                                |         |                     |         |                     |         |                        |         |                         |         |                       |         |
| β-Cryptoxanthin/1000 kcal     | 0.249                      | <0.001  | 0.559                       | <0.001  | 0.436                        | <0.001  | 0.134                 | <0.001  | 0.269                 | <0.001  |                            |         |                                |         |                     |         |                     |         |                        |         |                         |         |                       |         |
| Lutein + zeaxanthin/1000 kcal | 0.339                      | <0.001  | 0.559                       | <0.001  | 0.548                        | <0.001  | 0.220                 | <0.001  | 0.377                 | <0.001  | 0.421                      | <0.001  |                                |         |                     |         |                     |         |                        |         |                         |         |                       |         |
| Lycopene/1000 kcal            | 0.184                      | <0.001  | 0.736                       | <0.001  | 0.506                        | <0.001  | 0.138                 | <0.001  | 0.199                 | <0.001  | 0.276                      | <0.001  | 0.258                          | <0.001  |                     |         |                     |         |                        |         |                         |         |                       |         |
| Phytoene/1000 kcal            | 0.462                      | <0.001  | 0.901                       | <0.001  | 0.769                        | <0.001  | 0.312                 | <0.001  | 0.511                 | <0.001  | 0.565                      | <0.001  | 0.463                          | <0.001  | 0.476               | <0.001  |                     |         |                        |         |                         |         |                       |         |
| Phytofluene/1000 kcal         | 0.508                      | <0.001  | 0.888                       | <0.001  | 0.792                        | <0.001  | 0.361                 | <0.001  | 0.556                 | <0.001  | 0.569                      | <0.001  | 0.465                          | <0.001  | 0.445               | <0.001  | 0.996               | <0.001  |                        |         |                         |         |                       |         |
| Violaxanthin/1000 kcal        | 0.259                      | <0.001  | 0.470                       | <0.001  | 0.416                        | <0.001  | 0.158                 | <0.001  | 0.284                 | <0.001  | 0.502                      | <0.001  | 0.607                          | <0.001  | 0.168               | <0.001  | 0.343               | <0.001  | 0.347                  | <0.001  |                         |         |                       |         |
| Neoxanthin/1000               | 0.259                      | <0.001  | 0.446                       | <0.001  | 0.402                        | <0.001  | 0.169                 | <0.001  | 0.284                 | <0.001  | 0.371                      | <0.001  | 0.596                          | <0.001  | 0.162               | <0.001  | 0.326               | <0.001  | 0.329                  | <0.001  | 0.904                   | <0.001  |                       |         |



**Supplementary Table 6:** Logistic regression models for association between dietary carotenoid intake<sup>†</sup> and the odds of overweight/obesity\*.

|                            | Crude Model |       |       |              | Model 2**   |       |       |              | Model 3***  |       |       |              |
|----------------------------|-------------|-------|-------|--------------|-------------|-------|-------|--------------|-------------|-------|-------|--------------|
|                            | 95% CI      |       |       |              | 95% CI      |       |       |              | 95% CI      |       |       |              |
|                            | OR (Exp(B)) | Lower | Upper | p-value      | OR (Exp(B)) | Lower | Upper | p-value      | OR (Exp(B)) | Lower | Upper | p-value      |
| <b>α-Carotene</b>          | 0.686       | 0.516 | 0.911 | <b>0.009</b> | 0.698       | 0.520 | 0.936 | <b>0.016</b> | 0.745       | 0.551 | 1.006 | 0.054        |
| <b>β-Carotene</b>          | 0.588       | 0.394 | 0.877 | <b>0.009</b> | 0.632       | 0.419 | 0.953 | <b>0.028</b> | 0.717       | 0.466 | 1.104 | 0.131        |
| <b>β-Cryptoxanthin</b>     | 0.868       | 0.542 | 1.392 | 0.557        | 0.790       | 0.485 | 1.288 | 0.344        | 1.018       | 0.596 | 1.737 | 0.949        |
| <b>∑Provitamin A</b>       | 0.557       | 0.381 | 0.814 | <b>0.002</b> | 0.590       | 0.399 | 0.871 | <b>0.008</b> | 0.655       | 0.436 | 0.983 | <b>0.041</b> |
| <b>Lutein + zeaxanthin</b> | 0.556       | 0.354 | 0.875 | <b>0.011</b> | 0.697       | 0.435 | 1.118 | 0.134        | 0.845       | 0.510 | 1.399 | 0.513        |
| <b>Lycopene</b>            | 1.086       | 0.750 | 1.572 | 0.663        | 1.165       | 0.793 | 1.711 | 0.437        | 1.472       | 0.971 | 2.232 | 0.068        |
| <b>Phytoene</b>            | 0.589       | 0.338 | 1.025 | 0.061        | 0.493       | 0.276 | 0.880 | <b>0.017</b> | 0.659       | 0.321 | 1.354 | 0.257        |
| <b>Phytofluene</b>         | 0.618       | 0.353 | 1.081 | 0.092        | 0.508       | 0.283 | 0.911 | <b>0.023</b> | 0.691       | 0.337 | 1.417 | 0.313        |
| <b>Violaxanthin</b>        | 0.428       | 0.233 | 0.788 | <b>0.006</b> | 0.581       | 0.307 | 1.100 | 0.095        | 0.701       | 0.362 | 1.354 | 0.290        |
| <b>Neoxanthin</b>          | 0.466       | 0.257 | 0.844 | <b>0.012</b> | 0.673       | 0.363 | 1.248 | 0.209        | 0.850       | 0.443 | 1.629 | 0.624        |
| <b>Astaxanthin</b>         | 0.815       | 0.723 | 0.918 | <b>0.001</b> | 0.862       | 0.761 | 0.975 | 0.019        | 0.859       | 0.759 | 0.973 | <b>0.017</b> |
| <b>∑Non-provitamin A</b>   | 0.618       | 0.333 | 1.149 | 0.128        | 0.628       | 0.330 | 1.195 | 0.156        | 1.053       | 0.468 | 2.365 | 0.901        |
| <b>∑Total carotenoids</b>  | 0.489       | 0.281 | 0.854 | <b>0.012</b> | 0.525       | 0.296 | 0.930 | <b>0.027</b> | 0.684       | 0.355 | 1.316 | 0.255        |

\*Binary logistic regression analysis was performed with the odds of overweight/obesity as the dependent variable (0 = normal weight, 1 = overweight/obese). Continuous variables were log-transformed. Groups of overweight/obese and normal weight are determined based on BMI, where normal-weight status is defined as BMI <25 kg/m<sup>2</sup> and overweight/obesity is defined as BMI ≥25 kg/m<sup>2</sup>. <sup>†</sup>Carotenoid intake was adjusted for daily energy intake and expressed as μg/1000 kcal.

\*\* Model 2 adjusted for the following variables: age (y), sex (male/ female), marital status (married/ single/ other), education level (having diploma or low literacy/ higher than diploma), smoking status (yes/no), disease history (yes/no for cardiovascular disease, diabetes, and hypertension).

\*\*\*Model 3 was adjusted for the same variables as Model 2 with the addition of fruit and vegetable intake (fruit (g/day) + vegetables (g/day)).

Significant p-values (p <0.05) are shown in **bold**.

Abbreviations: OR = odds ratio, CI = confidence interval.



## Supplementary Tables

**Supplementary Table 7:** Associations between dietary intake of carotenoids and overweight/obesity based on BSA classification (sensitivity analysis)\*.

|                            | OR (Exp(B)) | 95% CI |       | p-value**    |
|----------------------------|-------------|--------|-------|--------------|
|                            |             | Lower  | Upper |              |
| <b>α-Carotene</b>          | 0.735       | 0.537  | 1,008 | 0.056        |
| <b>β-Carotene</b>          | 0.634       | 0.402  | 0.998 | <b>0.049</b> |
| <b>β-Cryptoxanthin</b>     | 0.942       | 0.537  | 1,650 | 0.833        |
| <b>∑ Provitamin A</b>      | 0.627       | 0.409  | 0.961 | <b>0.032</b> |
| <b>Lutein + zeaxanthin</b> | 1,126       | 0.665  | 1,906 | 0.658        |
| <b>Lycopene</b>            | 1,448       | 0.936  | 2,240 | 0.096        |
| <b>Phytoene</b>            | 0.891       | 0.418  | 1,896 | 0.764        |
| <b>Phytofluene</b>         | 0.844       | 0.397  | 1,797 | 0.661        |
| <b>Violaxanthin</b>        | 0.552       | 0.277  | 1,100 | 0.091        |
| <b>Neoxanthin</b>          | 0.738       | 0.374  | 1,455 | 0.381        |
| <b>Astaxanthin</b>         | 0.952       | 0.836  | 1,084 | 0.460        |
| <b>∑ Non-provitamin A</b>  | 1,144       | 0.489  | 2,676 | 0.756        |
| <b>∑ Total carotenoids</b> | 0.668       | 0.335  | 1,333 | 0.252        |

\*Binary logistic regression analysis was performed with the odds of overweight/obesity as the dependent variable (0 = normal weight, 1 = overweight/obese). BSA-based classification considered participants to be normal weight if BSA was  $\leq 1.91 \text{ m}^2$  and  $\leq 1.71 \text{ m}^2$  for men and women, respectively. Carotenoid intake was adjusted for daily energy intake and expressed as  $\mu\text{g}/1000 \text{ kcal}$ . Continuous variables were log-transformed. The model was adjusted for the following variables: age (y), sex (male/ female), marital status (married/ single/ other), education level (having diploma or low literacy/ higher than diploma), smoking status (yes/no), disease history (yes/no for cardiovascular disease, diabetes, and hypertension) and fruit and vegetable intake (fruit (g/day) + vegetables (g/day)).

\*\*Statistically significant p-values ( $p < 0.05$ ) are shown in **bold**.

Abbreviations: OR = odds ratio, CI = confidence interval, BSA = body surface area.

**Supplementary Table 8:** Association between dietary intake of carotenoids and overweight/obesity based on BMI in sex groups (sensitivity analysis)\*.

|                            | Women (n= 807) |        |       |           | Men (n= 798) |        |       |              |
|----------------------------|----------------|--------|-------|-----------|--------------|--------|-------|--------------|
|                            | OR (Exp(B))    | 95% CI |       | p-value** | OR (Exp(B))  | 95% CI |       | p-value**    |
|                            |                | Lower  | Upper |           |              | Lower  | Upper |              |
| <b>α-Carotene</b>          | 0.658          | 0.428  | 1.011 | 0.056     | 0.844        | 0.551  | 1.293 | 0.435        |
| <b>β-Carotene</b>          | 0.755          | 0.406  | 1.406 | 0.376     | 0.668        | 0.364  | 1.227 | 0.193        |
| <b>β-Cryptoxanthin</b>     | 1.355          | 0.630  | 2.912 | 0.436     | 0.757        | 0.355  | 1.613 | 0.471        |
| <b>Σ Provitamin A</b>      | 0.621          | 0.345  | 1.116 | 0.111     | 0.677        | 0.383  | 1.199 | 0.182        |
| <b>Lutein + zeaxanthin</b> | 0.720          | 0.348  | 1.489 | 0.375     | 0.983        | 0.484  | 1.996 | 0.962        |
| <b>Lycopene</b>            | 1.504          | 0.843  | 2.683 | 0.167     | 1.486        | 0.809  | 2.728 | 0.201        |
| <b>Phytoene</b>            | 0.675          | 0.234  | 1.951 | 0.468     | 0.675        | 0.251  | 1.812 | 0.435        |
| <b>Phytofluene</b>         | 0.744          | 0.257  | 2.151 | 0.585     | 0.675        | 0.252  | 1.807 | 0.434        |
| <b>Violaxanthin</b>        | 0.856          | 0.332  | 2.205 | 0.747     | 0.496        | 0.195  | 1.262 | 0.141        |
| <b>Neoxanthin</b>          | 0.778          | 0.301  | 2.008 | 0.603     | 0.808        | 0.326  | 2.001 | 0.644        |
| <b>Astaxanthin</b>         | 0.920          | 0.769  | 1.099 | 0.357     | 0.800        | 0.671  | 0.954 | <b>0.013</b> |
| <b>Σ Non-provitamin A</b>  | 1.184          | 0.368  | 3.810 | 0.777     | 0.963        | 0.310  | 2.995 | 0.949        |
| <b>Σ Total carotenoids</b> | 0.660          | 0.254  | 1.715 | 0.394     | 0.695        | 0.279  | 1.735 | 0.436        |

\* Binary logistic regression analysis was performed with the odds of overweight/obesity as the dependent variable (0 = normal weight, 1 = overweight/obese). Groups of overweight/obese and normal weight are determined based on BMI, where normal-weight status is defined as BMI <25 kg/m<sup>2</sup> and overweight/obesity is defined as BMI ≥25 kg/m<sup>2</sup>. Carotenoid intake was adjusted for daily energy intake and expressed as μg/1000 kcal. Continuous variables were log-transformed. The model was adjusted for the following variables: age (y), marital status (married/ single/ other), education level (having diploma or low literacy/ higher than diploma), smoking status (yes/no), disease history (yes/no for cardiovascular disease, diabetes, and hypertension) and fruit and vegetable intake (fruit (g/day) + vegetables (g/day)).

\*\*Statistically significant p-values (p < 0.05) are shown in **bold**.

Abbreviations: OR = odds ratio, CI = confidence interval.

**Supplementary Table 9.** Association between dietary intake of carotenoids and overweight/obesity based on BMI, separately adjusted either for fruits or for vegetables (sensitivity analysis)\*.

|                            | Fruit       |        |       |              | Vegetables  |        |       |              |
|----------------------------|-------------|--------|-------|--------------|-------------|--------|-------|--------------|
|                            | OR (Exp(B)) | 95% CI |       | p-value      | OR (Exp(B)) | 95% CI |       | p-value      |
|                            |             | Lower  | Upper |              |             | Lower  | Upper |              |
| <b>α-Carotene</b>          | 0.696       | 0.519  | 0.934 | <b>0.016</b> | 0.772       | 0.568  | 1.051 | 0.100        |
| <b>β-Carotene</b>          | 0.641       | 0.424  | 0.968 | <b>0.034</b> | 0.739       | 0.479  | 1.140 | 0.171        |
| <b>β-Cryptoxanthin</b>     | 0.848       | 0.482  | 1.492 | 0.567        | 0.847       | 0.518  | 1.386 | 0.509        |
| <b>Σ Provitamin A</b>      | 0.596       | 0.403  | 0.880 | <b>0.009</b> | 0.675       | 0.448  | 1.018 | 0.061        |
| <b>Lutein + zeaxanthin</b> | 0.723       | 0.440  | 1.188 | 0.200        | 0.794       | 0.491  | 1.286 | 0.349        |
| <b>Lycopene</b>            | 1.183       | 0.804  | 1.740 | 0.394        | 1.595       | 1.041  | 2.446 | <b>0.032</b> |
| <b>Phytoene</b>            | 0.453       | 0.228  | 0.900 | <b>0.024</b> | 0.610       | 0.331  | 1.126 | 0.114        |
| <b>Phytofluene</b>         | 0.474       | 0.238  | 0.945 | <b>0.034</b> | 0.629       | 0.340  | 1.163 | 0.139        |
| <b>Violaxanthin</b>        | 0.596       | 0.314  | 1.131 | 0.113        | 0.728       | 0.375  | 1.411 | 0.347        |
| <b>Neoxanthin</b>          | 0.695       | 0.372  | 1.297 | 0.253        | 0.883       | 0.459  | 1.696 | 0.708        |
| <b>Astaxanthin</b>         | 0.861       | 0.760  | 0.975 | <b>0.018</b> | 0.862       | 0.761  | 0.976 | <b>0.019</b> |
| <b>Σ Non-provitamin A</b>  | 0.661       | 0.325  | 1.341 | 0.251        | 0.926       | 0.452  | 1.896 | 0.833        |
| <b>Σ Total carotenoids</b> | 0.539       | 0.299  | 0.972 | <b>0.040</b> | 0.699       | 0.370  | 1.321 | 0.270        |

\*Binary logistic regression analysis was performed with the odds of overweight/obesity as the dependent variable (0 = normal weight, 1 = overweight/obese). Groups of overweight/obese and normal weight are determined based on BMI, where normal-weight status is defined as BMI <25 kg/m<sup>2</sup> and overweight/obesity is defined as BMI ≥25 kg/m<sup>2</sup>. Carotenoid intake was adjusted for daily energy intake and expressed as μg/1000 kcal. Continuous variables were log-transformed. The model was adjusted for the following variables: age (y), sex, marital status (married/ single/ other), education level (having diploma or low literacy/ higher than diploma), smoking status (yes/no), disease history (yes/no for cardiovascular disease, diabetes, and hypertension) and either fruit or vegetable intake.

Statistically significant p-values (p < 0.05) are shown in **bold**.

Abbreviations: OR = odds ratio, CI = confidence interval.

## Supplementary Tables

**Supplementary Table 10.** Association between dietary carotenoid intake and biomarkers (anthropometric and serum measurements) based on linear regression –crude models\*.

|                               | <b>α-Carotene</b>          |                   |        |        |                |                     | <b>β-Carotene</b> |                   |        |        |                |                     | <b>β-Cryptoxanthin</b> |                   |        |        |                |                     | <b>Provitamin A</b> |                   |        |        |                |                     |
|-------------------------------|----------------------------|-------------------|--------|--------|----------------|---------------------|-------------------|-------------------|--------|--------|----------------|---------------------|------------------------|-------------------|--------|--------|----------------|---------------------|---------------------|-------------------|--------|--------|----------------|---------------------|
|                               | 95% CI                     |                   |        |        |                |                     | 95% CI            |                   |        |        |                |                     | 95% CI                 |                   |        |        |                |                     | 95% CI              |                   |        |        |                |                     |
|                               | β                          | p-value           | Lower  | Upper  | R <sup>2</sup> | R <sup>2</sup> adj. | β                 | p-value           | Lower  | Upper  | R <sup>2</sup> | R <sup>2</sup> adj. | β                      | p-value           | Lower  | Upper  | R <sup>2</sup> | R <sup>2</sup> adj. | β                   | p-value           | Lower  | Upper  | R <sup>2</sup> | R <sup>2</sup> adj. |
| <b>BMI (kg/m<sup>2</sup>)</b> | -0.008                     | 0.073             | -0.016 | 0.001  | 0.002          | 0.001               | -0.010            | 0.100             | -0.022 | 0.002  | 0.002          | 0.001               | -0.002                 | 0.828             | -0.016 | 0.012  | 0.000          | -0.001              | -0.011              | <b>0.045</b>      | -0.023 | 0.000  | 0.003          | 0.002               |
| <b>WC (cm)</b>                | -0.013                     | <b>0.023</b>      | -0.024 | -0.002 | 0.003          | 0.003               | -0.017            | <b>0.034</b>      | -0.033 | -0.001 | 0.003          | 0.002               | -0.006                 | 0.560             | -0.024 | 0.013  | 0.000          | 0.000               | -0.018              | <b>0.015</b>      | -0.033 | -0.004 | 0.004          | 0.003               |
| <b>FBG (mg/dL)</b>            | 0.006                      | 0.250             | -0.004 | 0.016  | 0.001          | 0.000               | 0.005             | 0.534             | -0.010 | 0.019  | 0.000          | 0.000               | 0.004                  | 0.606             | -0.013 | 0.021  | 0.000          | 0.000               | 0.005               | 0.428             | -0.008 | 0.019  | 0.000          | 0.000               |
| <b>Insulin (mIU/mL)</b>       | -0.014                     | 0.440             | -0.050 | 0.022  | 0.000          | 0.000               | -0.028            | 0.279             | -0.079 | 0.023  | 0.001          | 0.000               | -0.010                 | 0.748             | -0.070 | 0.050  | 0.000          | -0.001              | -0.022              | 0.372             | -0.070 | 0.026  | 0.000          | 0.000               |
| <b>HOMA-IR</b>                | -0.008                     | 0.689             | -0.049 | 0.032  | 0.000          | -0.001              | -0.024            | 0.419             | -0.081 | 0.034  | 0.000          | 0.000               | -0.005                 | 0.876             | -0.073 | 0.062  | 0.000          | -0.001              | -0.016              | 0.551             | -0.071 | 0.038  | 0.000          | 0.000               |
| <b>HDL-c (mg/dL)</b>          | 0.003                      | 0.689             | -0.013 | 0.019  | 0.000          | -0.001              | 0.001             | 0.916             | -0.021 | 0.024  | 0.000          | -0.001              | 0.011                  | 0.439             | -0.016 | 0.037  | 0.000          | 0.000               | 0.003               | 0.778             | -0.018 | 0.025  | 0.000          | -0.001              |
| <b>LDL-c (mg/dL)</b>          | -0.012                     | 0.183             | -0.029 | 0.006  | 0.001          | 0.000               | -0.010            | 0.427             | -0.034 | 0.015  | 0.000          | 0.000               | -0.003                 | 0.858             | -0.032 | 0.026  | 0.000          | -0.001              | -0.012              | 0.321             | -0.035 | 0.011  | 0.001          | 0.000               |
| <b>TC (mg/dL)</b>             | -0.007                     | 0.270             | -0.019 | 0.005  | 0.001          | 0.000               | -0.004            | 0.650             | -0.021 | 0.013  | 0.000          | 0.000               | -0.003                 | 0.762             | -0.023 | 0.017  | 0.000          | -0.001              | -0.005              | 0.508             | -0.021 | 0.011  | 0.000          | 0.000               |
| <b>TG (mg/dL)</b>             | -0.014                     | 0.370             | -0.045 | 0.017  | 0.001          | 0.000               | -0.009            | 0.677             | -0.052 | 0.034  | 0.000          | -0.001              | -0.023                 | 0.380             | -0.074 | 0.028  | 0.000          | 0.000               | -0.013              | 0.533             | -0.054 | 0.028  | 0.000          | 0.000               |
| <b>SBP (mmHg)</b>             | -0.003                     | 0.488             | -0.011 | 0.005  | 0.000          | 0.000               | -0.004            | 0.519             | -0.015 | 0.008  | 0.000          | 0.000               | -0.013                 | 0.057             | -0.027 | 0.000  | 0.002          | 0.002               | -0.004              | 0.458             | -0.015 | 0.007  | 0.000          | 0.000               |
| <b>DBP (mmHg)</b>             | -0.003                     | 0.540             | -0.011 | 0.006  | 0.000          | 0.000               | -0.005            | 0.415             | -0.016 | 0.007  | 0.000          | 0.000               | -0.015                 | <b>0.031</b>      | -0.028 | -0.001 | 0.003          | 0.002               | -0.004              | 0.421             | -0.015 | 0.006  | 0.000          | 0.000               |
| <b>hs-CRP (mg/dL)</b>         | 0.012                      | 0.437             | -0.019 | 0.043  | 0.000          | 0.000               | 0.015             | 0.486             | -0.028 | 0.059  | 0.000          | 0.000               | -0.001                 | 0.963             | -0.053 | 0.050  | 0.000          | -0.001              | 0.015               | 0.464             | -0.026 | 0.056  | 0.000          | 0.000               |
| <b>IL-6 (pg/mL)</b>           | -0.074                     | <b>&lt; 0.001</b> | -0.115 | -0.033 | 0.008          | 0.007               | -0.088            | <b>0.003</b>      | -0.146 | -0.030 | 0.005          | 0.005               | -0.100                 | <b>0.005</b>      | -0.168 | -0.031 | 0.005          | 0.004               | -0.092              | <b>0.001</b>      | -0.147 | -0.037 | 0.007          | 0.006               |
| <b>IL-1β (pg/mL)</b>          | -0.070                     | <b>&lt; 0.001</b> | -0.105 | -0.035 | 0.009          | 0.009               | -0.110            | <b>&lt; 0.001</b> | -0.159 | -0.060 | 0.012          | 0.011               | -0.118                 | <b>&lt; 0.001</b> | -0.176 | -0.059 | 0.010          | 0.009               | -0.103              | <b>&lt; 0.001</b> | -0.149 | -0.056 | 0.011          | 0.011               |
| <b>TNF-α (pg/mL)</b>          | -0.043                     | <b>0.041</b>      | -0.084 | -0.002 | 0.003          | 0.002               | -0.066            | <b>0.026</b>      | -0.124 | -0.008 | 0.003          | 0.002               | -0.077                 | <b>0.027</b>      | -0.146 | -0.009 | 0.003          | 0.002               | -0.063              | <b>0.025</b>      | -0.117 | -0.008 | 0.003          | 0.003               |
| <b>IL-10 (pg/mL)</b>          | 0.055                      | <b>0.017</b>      | 0.010  | 0.100  | 0.004          | 0.003               | 0.099             | <b>0.002</b>      | 0.036  | 0.162  | 0.006          | 0.005               | 0.075                  | 0.050             | 0.000  | 0.150  | 0.002          | 0.002               | 0.089               | <b>0.003</b>      | 0.030  | 0.149  | 0.005          | 0.005               |
| <b>IL-4 (pg/mL)</b>           | -0.009                     | 0.786             | -0.072 | 0.054  | 0.000          | -0.001              | -0.012            | 0.798             | -0.101 | 0.077  | 0.000          | -0.001              | -0.105                 | 0.052             | -0.210 | 0.001  | 0.002          | 0.002               | -0.013              | 0.767             | -0.097 | 0.072  | 0.000          | -0.001              |
| <b>TAC (μM)</b>               | 0.078                      | <b>0.004</b>      | 0.026  | 0.131  | 0.005          | 0.005               | 0.101             | <b>0.008</b>      | 0.026  | 0.175  | 0.004          | 0.004               | 0.084                  | 0.062             | -0.004 | 0.172  | 0.002          | 0.002               | 0.101               | <b>0.005</b>      | 0.031  | 0.171  | 0.005          | 0.004               |
| <b>MDA (μM)</b>               | 0.011                      | 0.559             | -0.027 | 0.050  | 0.000          | 0.000               | 0.002             | 0.956             | -0.052 | 0.055  | 0.000          | -0.001              | -0.036                 | 0.266             | -0.100 | 0.028  | 0.001          | 0.000               | 0.004               | 0.866             | -0.047 | 0.055  | 0.000          | -0.001              |
|                               | <b>Lutein + Zeaxanthin</b> |                   |        |        |                |                     | <b>Lycopene</b>   |                   |        |        |                |                     | <b>Phytoene</b>        |                   |        |        |                |                     | <b>Phytofluene</b>  |                   |        |        |                |                     |
|                               | 95% CI                     |                   |        |        |                |                     | 95% CI            |                   |        |        |                |                     | 95% CI                 |                   |        |        |                |                     | 95% CI              |                   |        |        |                |                     |
|                               | β                          | p-value           | Lower  | Upper  | R <sup>2</sup> | R <sup>2</sup> adj. | β                 | p-value           | Lower  | Upper  | R <sup>2</sup> | R <sup>2</sup> adj. | β                      | p-value           | Lower  | Upper  | R <sup>2</sup> | R <sup>2</sup> adj. | β                   | p-value           | Lower  | Upper  | R <sup>2</sup> | R <sup>2</sup> adj. |
| <b>BMI (kg/m<sup>2</sup>)</b> | -0.003                     | 0.711             | -0.016 | 0.011  | 0.000          | -0.001              | 0.004             | 0.497             | -0.007 | 0.015  | 0.000          | 0.000               | -0.004                 | 0.619             | -0.021 | 0.012  | 0.000          | 0.000               | -0.003              | 0.716             | -0.020 | 0.013  | 0.000          | -0.001              |
| <b>WC (cm)</b>                | -0.012                     | 0.174             | -0.030 | 0.005  | 0.001          | 0.001               | 0.010             | 0.162             | -0.004 | 0.025  | 0.001          | 0.001               | 0.000                  | 0.986             | -0.022 | 0.022  | 0.000          | -0.001              | -0.001              | 0.935             | -0.023 | 0.021  | 0.000          | -0.001              |
| <b>FBG (mg/dL)</b>            | -0.002                     | 0.782             | -0.018 | 0.014  | 0.000          | -0.001              | 0.007             | 0.278             | -0.006 | 0.021  | 0.001          | 0.000               | 0.004                  | 0.687             | -0.016 | 0.024  | 0.000          | -0.001              | 0.004               | 0.663             | -0.016 | 0.025  | 0.000          | -0.001              |
| <b>Insulin (mIU/mL)</b>       | 0.012                      | 0.693             | -0.046 | 0.069  | 0.000          | -0.001              | 0.014             | 0.567             | -0.034 | 0.061  | 0.000          | 0.000               | -0.030                 | 0.411             | -0.101 | 0.041  | 0.000          | 0.000               | -0.032              | 0.378             | -0.104 | 0.039  | 0.000          | 0.000               |

## Food and Function

## Supplementary Tables

|                       |        |                   |        |        |       |        |        |              |        |        |       |        |        |                   |        |        |       |        |        |                   |        |        |       |        |
|-----------------------|--------|-------------------|--------|--------|-------|--------|--------|--------------|--------|--------|-------|--------|--------|-------------------|--------|--------|-------|--------|--------|-------------------|--------|--------|-------|--------|
| HOMA-IR               | 0.009  | 0.778             | -0.055 | 0.074  | 0.000 | -0.001 | 0.021  | 0.435        | -0.032 | 0.074  | 0.000 | 0.000  | -0.026 | 0.528             | -0.105 | 0.054  | 0.000 | 0.000  | -0.028 | 0.499             | -0.108 | 0.052  | 0.000 | 0.000  |
| HDL-c (mg/dL)         | 0.027  | <b>0.041</b>      | 0.001  | 0.052  | 0.003 | 0.002  | 0.019  | 0.085        | -0.003 | 0.040  | 0.002 | 0.001  | 0.039  | <b>0.016</b>      | 0.007  | 0.070  | 0.004 | 0.003  | 0.037  | <b>0.023</b>      | 0.005  | 0.069  | 0.003 | 0.003  |
| LDL-c (mg/dL)         | 0.000  | 0.993             | -0.028 | 0.028  | 0.000 | -0.001 | -0.007 | 0.554        | -0.030 | 0.016  | 0.000 | 0.000  | -0.019 | 0.276             | -0.053 | 0.015  | 0.001 | 0.000  | -0.019 | 0.282             | -0.053 | 0.015  | 0.001 | 0.000  |
| TC (mg/dL)            | 0.000  | 0.971             | -0.019 | 0.019  | 0.000 | -0.001 | -0.006 | 0.438        | -0.022 | 0.009  | 0.000 | 0.000  | -0.012 | 0.321             | -0.035 | 0.012  | 0.001 | 0.000  | -0.012 | 0.337             | -0.035 | 0.012  | 0.001 | 0.000  |
| TG (mg/dL)            | -0.038 | 0.128             | -0.087 | 0.011  | 0.001 | 0.001  | 0.006  | 0.785        | -0.035 | 0.046  | 0.000 | -0.001 | -0.028 | 0.356             | -0.089 | 0.032  | 0.001 | 0.000  | -0.028 | 0.363             | -0.089 | 0.033  | 0.001 | 0.000  |
| SBP (mmHg)            | -0.007 | 0.293             | -0.020 | 0.006  | 0.001 | 0.000  | 0.003  | 0.618        | -0.008 | 0.013  | 0.000 | 0.000  | 0.006  | 0.464             | -0.010 | 0.022  | 0.000 | 0.000  | 0.005  | 0.514             | -0.011 | 0.022  | 0.000 | 0.000  |
| DBP (mmHg)            | -0.004 | 0.561             | -0.017 | 0.009  | 0.000 | 0.000  | -0.003 | 0.524        | -0.014 | 0.007  | 0.000 | 0.000  | -0.005 | 0.508             | -0.021 | 0.011  | 0.000 | 0.000  | -0.006 | 0.481             | -0.022 | 0.010  | 0.000 | 0.000  |
| hs-CRP (mg/dL)        | -0.038 | 0.124             | -0.087 | 0.011  | 0.001 | 0.001  | 0.006  | 0.755        | -0.034 | 0.047  | 0.000 | -0.001 | -0.003 | 0.927             | -0.063 | 0.057  | 0.000 | -0.001 | 0.000  | 0.988             | -0.060 | 0.061  | 0.000 | -0.001 |
| IL-6 (pg/mL)          | -0.036 | 0.278             | -0.102 | 0.029  | 0.001 | 0.000  | -0.082 | <b>0.003</b> | -0.136 | -0.028 | 0.005 | 0.005  | -0.075 | 0.069             | -0.156 | 0.006  | 0.002 | 0.001  | -0.087 | <b>0.036</b>      | -0.169 | -0.006 | 0.003 | 0.002  |
| IL-1 $\beta$ (pg/mL)  | -0.099 | <b>0.001</b>      | -0.155 | -0.043 | 0.007 | 0.007  | -0.078 | <b>0.001</b> | -0.124 | -0.032 | 0.007 | 0.006  | -0.126 | <b>&lt; 0.001</b> | -0.195 | -0.057 | 0.008 | 0.007  | -0.135 | <b>&lt; 0.001</b> | -0.204 | -0.065 | 0.009 | 0.008  |
| TNF- $\alpha$ (pg/mL) | -0.061 | 0.067             | -0.126 | 0.004  | 0.002 | 0.001  | -0.086 | <b>0.002</b> | -0.140 | -0.033 | 0.006 | 0.006  | -0.032 | 0.430             | -0.113 | 0.048  | 0.000 | 0.000  | -0.033 | 0.422             | -0.114 | 0.048  | 0.000 | 0.000  |
| IL-10 (pg/mL)         | 0.094  | <b>0.010</b>      | 0.023  | 0.166  | 0.004 | 0.004  | 0.048  | 0.112        | -0.011 | 0.107  | 0.002 | 0.001  | 0.073  | 0.104             | -0.015 | 0.161  | 0.002 | 0.001  | 0.074  | 0.101             | -0.015 | 0.163  | 0.002 | 0.001  |
| IL-4 (pg/mL)          | -0.028 | 0.591             | -0.128 | 0.073  | 0.000 | 0.000  | 0.015  | 0.727        | -0.068 | 0.097  | 0.000 | -0.001 | -0.076 | 0.227             | -0.200 | 0.047  | 0.001 | 0.000  | -0.080 | 0.210             | -0.204 | 0.045  | 0.001 | 0.000  |
| TAC ( $\mu$ M)        | 0.158  | <b>&lt; 0.001</b> | 0.074  | 0.242  | 0.008 | 0.008  | 0.029  | 0.414        | -0.040 | 0.098  | 0.000 | 0.000  | 0.093  | 0.079             | -0.011 | 0.196  | 0.002 | 0.001  | 0.098  | 0.066             | -0.007 | 0.202  | 0.002 | 0.001  |
| MDA ( $\mu$ M)        | -0.018 | 0.555             | -0.079 | 0.043  | 0.000 | 0.000  | 0.020  | 0.439        | -0.030 | 0.070  | 0.000 | 0.000  | 0.015  | 0.692             | -0.060 | 0.090  | 0.000 | -0.001 | 0.017  | 0.658             | -0.058 | 0.092  | 0.000 | -0.001 |

## Violaxanthin

## Neoxanthin

## Astaxanthin

95% CI

95% CI

95% CI

|                          | Violaxanthin |              | Neoxanthin |        |                |                     | Astaxanthin |              |        |        |                |                     |         |         |        |       |                |                     |
|--------------------------|--------------|--------------|------------|--------|----------------|---------------------|-------------|--------------|--------|--------|----------------|---------------------|---------|---------|--------|-------|----------------|---------------------|
|                          | $\beta$      | p-value      | Lower      | Upper  | R <sup>2</sup> | R <sup>2</sup> adj. | $\beta$     | p-value      | Lower  | Upper  | R <sup>2</sup> | R <sup>2</sup> adj. | $\beta$ | p-value | Lower  | Upper | R <sup>2</sup> | R <sup>2</sup> adj. |
| BMI (kg/m <sup>2</sup> ) | -0.008       | 0.382        | -0.026     | 0.010  | 0.000          | 0.000               | -0.004      | 0.670        | -0.021 | 0.014  | 0.000          | -0.001              | -0.003  | 0.154   | -0.006 | 0.001 | 0.001          | 0.001               |
| WC (cm)                  | -0.012       | 0.326        | -0.036     | 0.012  | 0.001          | 0.000               | -0.012      | 0.325        | -0.035 | 0.012  | 0.001          | 0.000               | -0.003  | 0.165   | -0.008 | 0.001 | 0.001          | 0.001               |
| FBG (mg/dL)              | -0.014       | 0.217        | -0.035     | 0.008  | 0.001          | 0.000               | -0.018      | 0.093        | -0.039 | 0.003  | 0.002          | 0.001               | -0.001  | 0.635   | -0.005 | 0.003 | 0.000          | 0.000               |
| Insulin (mIU/dL)         | 0.033        | 0.400        | -0.044     | 0.111  | 0.000          | 0.000               | 0.011       | 0.773        | -0.064 | 0.087  | 0.000          | -0.001              | 0.008   | 0.292   | -0.007 | 0.023 | 0.001          | 0.000               |
| HOMA IR                  | 0.020        | 0.660        | -0.067     | 0.106  | 0.000          | -0.001              | -0.007      | 0.870        | -0.092 | 0.078  | 0.000          | -0.001              | 0.007   | 0.413   | -0.010 | 0.024 | 0.000          | 0.000               |
| HDL-c (mg/dL)            | 0.017        | 0.347        | -0.018     | 0.051  | 0.001          | 0.000               | 0.011       | 0.516        | -0.022 | 0.045  | 0.000          | 0.000               | 0.002   | 0.650   | -0.005 | 0.008 | 0.000          | 0.000               |
| LDL-c (mg/dL)            | 0.006        | 0.762        | -0.031     | 0.043  | 0.000          | -0.001              | -0.001      | 0.935        | -0.038 | 0.035  | 0.000          | -0.001              | 0.001   | 0.784   | -0.006 | 0.008 | 0.000          | -0.001              |
| TC (mg/dL)               | -0.007       | 0.583        | -0.033     | 0.018  | 0.000          | 0.000               | -0.013      | 0.306        | -0.038 | 0.012  | 0.001          | 0.000               | 0.000   | 0.883   | -0.005 | 0.005 | 0.000          | -0.001              |
| TG (mg/dL)               | -0.053       | 0.114        | -0.119     | 0.013  | 0.002          | 0.001               | -0.050      | 0.126        | -0.114 | 0.014  | 0.001          | 0.001               | -0.006  | 0.342   | -0.019 | 0.007 | 0.001          | 0.000               |
| SBP (mmHg)               | -0.015       | 0.100        | -0.032     | 0.003  | 0.002          | 0.001               | -0.014      | 0.103        | -0.031 | 0.003  | 0.002          | 0.001               | 0.000   | 0.960   | -0.004 | 0.003 | 0.000          | -0.001              |
| DBP (mmHg)               | -0.010       | 0.236        | -0.028     | 0.007  | 0.001          | 0.000               | -0.003      | 0.724        | -0.020 | 0.014  | 0.000          | -0.001              | -0.001  | 0.404   | -0.005 | 0.002 | 0.000          | 0.000               |
| hs-CRP (mg/dL)           | -0.020       | 0.551        | -0.086     | 0.046  | 0.000          | 0.000               | -0.021      | 0.524        | -0.085 | 0.043  | 0.000          | 0.000               | -0.003  | 0.659   | -0.016 | 0.010 | 0.000          | -0.001              |
| IL-6 (pg/mL)             | -0.071       | 0.118        | -0.159     | 0.018  | 0.002          | 0.001               | -0.080      | 0.070        | -0.166 | 0.007  | 0.002          | 0.001               | -0.004  | 0.632   | -0.021 | 0.013 | 0.000          | 0.000               |
| IL-1 $\beta$ (pg/mL)     | -0.120       | <b>0.002</b> | -0.195     | -0.045 | 0.006          | 0.005               | -0.123      | <b>0.001</b> | -0.197 | -0.050 | 0.007          | 0.006               | -0.013  | 0.088   | -0.028 | 0.002 | 0.002          | 0.001               |
| TNF- $\alpha$ (pg/mL)    | -0.015       | 0.738        | -0.103     | 0.073  | 0.000          | -0.001              | -0.013      | 0.767        | -0.099 | 0.073  | 0.000          | -0.001              | 0.001   | 0.867   | -0.016 | 0.019 | 0.000          | -0.001              |

| ARTICLE       | Journal Name |                   |        |       |       |        |        |                   |        |       |       |       |        |       |        |       |       |        |
|---------------|--------------|-------------------|--------|-------|-------|--------|--------|-------------------|--------|-------|-------|-------|--------|-------|--------|-------|-------|--------|
| IL-10 (pg/mL) | 0.142        | <b>0.004</b>      | 0.046  | 0.238 | 0.005 | 0.005  | 0.168  | <b>&lt; 0.001</b> | 0.074  | 0.262 | 0.008 | 0.007 | 0.002  | 0.798 | -0.016 | 0.021 | 0.000 | -0.001 |
| IL-4 (pg/mL)  | -0.045       | 0.515             | -0.180 | 0.090 | 0.000 | 0.000  | -0.070 | 0.301             | -0.201 | 0.062 | 0.001 | 0.000 | -0.016 | 0.234 | -0.042 | 0.010 | 0.001 | 0.000  |
| TAC (μM)      | 0.252        | <b>&lt; 0.001</b> | 0.139  | 0.364 | 0.012 | 0.011  | 0.301  | <b>&lt; 0.001</b> | 0.191  | 0.411 | 0.018 | 0.017 | 0.009  | 0.419 | -0.013 | 0.031 | 0.000 | 0.000  |
| MDA (μM)      | 0.014        | 0.730             | -0.067 | 0.096 | 0.000 | -0.001 | 0.027  | 0.501             | -0.052 | 0.107 | 0.000 | 0.000 | 0.006  | 0.487 | -0.010 | 0.022 | 0.000 | 0.000  |

|                          | Non-Provitamin A |                   |        |        |                |                     | Total Carotenoids |                   |        |        |                |                     |
|--------------------------|------------------|-------------------|--------|--------|----------------|---------------------|-------------------|-------------------|--------|--------|----------------|---------------------|
|                          |                  |                   | 95% CI |        | R <sup>2</sup> | R <sup>2</sup> adj. |                   |                   | 95% CI |        | R <sup>2</sup> | R <sup>2</sup> adj. |
|                          | β                | p-value           | Lower  | Upper  |                |                     | β                 | p-value           | Lower  | Upper  |                |                     |
| BMI (kg/m <sup>2</sup> ) | -0.001           | 0.873             | -0.020 | 0.017  | 0.000          | -0.001              | -0.010            | 0.220             | -0.027 | 0.006  | 0.001          | 0.000               |
| WC (cm)                  | 0.005            | 0.690             | -0.019 | 0.029  | 0.000          | -0.001              | -0.014            | 0.217             | -0.035 | 0.008  | 0.001          | 0.000               |
| FBG (mg/dL)              | 0.006            | 0.623             | -0.017 | 0.028  | 0.000          | 0.000               | 0.010             | 0.348             | -0.010 | 0.029  | 0.001          | 0.000               |
| Insulin (mIU/mL)         | -0.007           | 0.856             | -0.087 | 0.072  | 0.000          | -0.001              | -0.018            | 0.615             | -0.089 | 0.053  | 0.000          | 0.000               |
| HOMA IR                  | -0.002           | 0.969             | -0.091 | 0.087  | 0.000          | -0.001              | -0.009            | 0.831             | -0.088 | 0.071  | 0.000          | -0.001              |
| HDL-c (mg/dL)            | 0.044            | <b>0.014</b>      | 0.009  | 0.079  | 0.004          | 0.003               | 0.022             | 0.163             | -0.009 | 0.054  | 0.001          | 0.001               |
| LDL-c (mg/dL)            | -0.014           | 0.462             | -0.052 | 0.024  | 0.000          | 0.000               | -0.016            | 0.361             | -0.050 | 0.018  | 0.001          | 0.000               |
| TC (mg/dL)               | -0.012           | 0.375             | -0.038 | 0.014  | 0.000          | 0.000               | -0.010            | 0.399             | -0.033 | 0.013  | 0.000          | 0.000               |
| TG (mg/dL)               | -0.026           | 0.451             | -0.093 | 0.041  | 0.000          | 0.000               | -0.019            | 0.538             | -0.079 | 0.041  | 0.000          | 0.000               |
| SBP (mmHg)               | 0.003            | 0.767             | -0.015 | 0.021  | 0.000          | -0.001              | -0.003            | 0.752             | -0.019 | 0.013  | 0.000          | -0.001              |
| DBP (mmHg)               | -0.008           | 0.393             | -0.025 | 0.010  | 0.000          | 0.000               | -0.007            | 0.399             | -0.023 | 0.009  | 0.000          | 0.000               |
| hs-CRP (mg/dL)           | -0.015           | 0.668             | -0.082 | 0.053  | 0.000          | -0.001              | 0.010             | 0.737             | -0.050 | 0.071  | 0.000          | -0.001              |
| IL-6 (pg/mL)             | -0.108           | <b>0.019</b>      | -0.199 | -0.018 | 0.003          | 0.003               | -0.129            | <b>0.002</b>      | -0.210 | -0.049 | 0.006          | 0.006               |
| IL-1β (pg/mL)            | -0.170           | <b>&lt; 0.001</b> | -0.246 | -0.093 | 0.012          | 0.011               | -0.175            | <b>&lt; 0.001</b> | -0.244 | -0.107 | 0.015          | 0.015               |
| TNF-α (pg/mL)            | -0.087           | 0.057             | -0.177 | 0.002  | 0.002          | 0.002               | -0.103            | <b>0.012</b>      | -0.183 | -0.023 | 0.004          | 0.003               |
| IL-10 (pg/mL)            | 0.106            | <b>0.034</b>      | 0.008  | 0.205  | 0.003          | 0.002               | 0.146             | <b>0.001</b>      | 0.059  | 0.234  | 0.007          | 0.006               |
| IL-4 (pg/mL)             | -0.048           | 0.499             | -0.186 | 0.091  | 0.000          | 0.000               | -0.013            | 0.835             | -0.137 | 0.111  | 0.000          | -0.001              |
| TAC (μM)                 | 0.139            | <b>0.019</b>      | 0.023  | 0.254  | 0.003          | 0.003               | 0.167             | <b>0.002</b>      | 0.063  | 0.270  | 0.006          | 0.006               |
| MDA (μM)                 | 0.019            | 0.655             | -0.065 | 0.103  | 0.000          | 0.000               | 0.015             | 0.690             | -0.060 | 0.090  | 0.000          | -0.001              |

\* Linear regression models were used to assess the unadjusted associations between carotenoids and a selected list of biomarkers relevant to cardiometabolic health, inflammatory status, and oxidative stress. All continuous variables were log-transformed. Carotenoids were adjusted for total energy intake (μg/1000 kcal) prior to log-transformation.

Statistically significant p-values (p < 0.05) are shown in **bold**.

Abbreviations: BMI = body mass index, HOMA IR = homeostatic model assessment of insulin resistance, HDL-c = high-density lipoprotein cholesterol, LDL-c = low-density lipoprotein cholesterol, SBP = systolic blood pressure, DBP = diastolic blood pressure, hs-CRP = high-sensitivity C-reactive protein, IL = interleukin, TNF-α = tumor necrosis factor α, TAC = total antioxidant capacity, MDA = malondialdehyde, WC = waist circumference, FBG = fasting blood glucose, TC = total cholesterol, TG = triglycerides.

**Supplementary Table 11:** Association between dietary carotenoid intake and biomarkers (anthropometric and serum measurements) based on linear regression – Models 2\*.

|                               | <b>α-Carotene</b>          |              |        |        |                |                     | <b>β-Carotene</b> |              |        |        |                |                     | <b>β-Cryptoxanthin</b> |              |        |        |                |                     | <b>Provitamin A</b> |              |        |        |                |                     |
|-------------------------------|----------------------------|--------------|--------|--------|----------------|---------------------|-------------------|--------------|--------|--------|----------------|---------------------|------------------------|--------------|--------|--------|----------------|---------------------|---------------------|--------------|--------|--------|----------------|---------------------|
|                               |                            |              | 95% CI |        |                |                     |                   |              | 95% CI |        |                |                     |                        |              | 95% CI |        |                |                     |                     |              | 95% CI |        |                |                     |
|                               | β                          | p-value      | Lower  | Upper  | R <sup>2</sup> | R <sup>2</sup> adj. | β                 | p-value      | Lower  | Upper  | R <sup>2</sup> | R <sup>2</sup> adj. | β                      | p-value      | Lower  | Upper  | R <sup>2</sup> | R <sup>2</sup> adj. | β                   | p-value      | Lower  | Upper  | R <sup>2</sup> | R <sup>2</sup> adj. |
| <b>BMI (kg/m<sup>2</sup>)</b> | -0.007                     | 0.103        | -0.015 | 0.001  | 0.02           | 0.014               | -0.008            | 0.168        | -0.020 | 0.003  | 0.02           | 0.014               | -0.002                 | 0.795        | -0.016 | 0.012  | 0.019          | 0.012               | -0.010              | 0.081        | -0.021 | 0.001  | 0.02           | 0.014               |
| <b>WC (cm)</b>                | -0.007                     | 0.154        | -0.017 | 0.003  | 0.254          | 0.249               | -0.012            | 0.085        | -0.026 | 0.002  | 0.255          | 0.250               | -0.009                 | 0.297        | -0.025 | 0.008  | 0.254          | 0.249               | -0.011              | 0.084        | -0.024 | 0.002  | 0.255          | 0.250               |
| <b>FBG (mg/dL)</b>            | 0.007                      | 0.203        | -0.004 | 0.017  | 0.005          | -0.001              | 0.006             | 0.447        | -0.009 | 0.020  | 0.005          | -0.002              | 0.004                  | 0.650        | -0.013 | 0.021  | 0.005          | -0.002              | 0.007               | 0.348        | -0.007 | 0.020  | 0.005          | -0.002              |
| <b>Insulin (mIU/mL)</b>       | -0.013                     | 0.475        | -0.050 | 0.023  | 0.007          | 0.000               | -0.027            | 0.297        | -0.078 | 0.024  | 0.007          | 0.001               | -0.008                 | 0.795        | -0.069 | 0.053  | 0.007          | 0.000               | -0.021              | 0.396        | -0.070 | 0.028  | 0.007          | 0.000               |
| <b>HOMA-IR</b>                | -0.007                     | 0.751        | -0.048 | 0.034  | 0.005          | -0.002              | -0.022            | 0.461        | -0.079 | 0.036  | 0.005          | -0.002              | -0.004                 | 0.907        | -0.072 | 0.064  | 0.005          | -0.002              | -0.014              | 0.603        | -0.069 | 0.040  | 0.005          | -0.002              |
| <b>HDL-c (mg/dL)</b>          | 0.000                      | 0.953        | -0.016 | 0.017  | 0.022          | 0.015               | -0.003            | 0.783        | -0.026 | 0.019  | 0.022          | 0.015               | 0.013                  | 0.339        | -0.014 | 0.040  | 0.022          | 0.016               | -0.001              | 0.901        | -0.023 | 0.020  | 0.022          | 0.015               |
| <b>LDL-c (mg/dL)</b>          | -0.010                     | 0.265        | -0.027 | 0.008  | 0.011          | 0.004               | -0.006            | 0.604        | -0.031 | 0.018  | 0.01           | 0.004               | -0.005                 | 0.744        | -0.034 | 0.024  | 0.01           | 0.003               | -0.009              | 0.462        | -0.032 | 0.015  | 0.011          | 0.004               |
| <b>TC (mg/dL)</b>             | -0.006                     | 0.316        | -0.018 | 0.006  | 0.007          | 0.000               | -0.002            | 0.774        | -0.019 | 0.014  | 0.006          | -0.001              | -0.005                 | 0.647        | -0.025 | 0.015  | 0.006          | -0.001              | -0.004              | 0.617        | -0.020 | 0.012  | 0.006          | 0.000               |
| <b>TG (mg/dL)</b>             | -0.010                     | 0.508        | -0.041 | 0.020  | 0.012          | 0.005               | -0.005            | 0.835        | -0.048 | 0.039  | 0.012          | 0.005               | -0.027                 | 0.300        | -0.079 | 0.024  | 0.012          | 0.006               | -0.008              | 0.702        | -0.049 | 0.033  | 0.012          | 0.005               |
| <b>SBP (mmHg)</b>             | -0.003                     | 0.470        | -0.011 | 0.005  | 0.016          | 0.009               | -0.004            | 0.535        | -0.015 | 0.008  | 0.015          | 0.009               | -0.011                 | 0.104        | -0.025 | 0.002  | 0.017          | 0.010               | -0.004              | 0.464        | -0.015 | 0.007  | 0.016          | 0.009               |
| <b>DBP (mmHg)</b>             | -0.002                     | 0.553        | -0.011 | 0.006  | 0.02           | 0.013               | -0.004            | 0.454        | -0.016 | 0.007  | 0.02           | 0.013               | -0.014                 | <b>0.041</b> | -0.028 | -0.001 | 0.022          | 0.016               | -0.004              | 0.438        | -0.015 | 0.007  | 0.02           | 0.013               |
| <b>hs-CRP (mg/dL)</b>         | 0.019                      | 0.214        | -0.011 | 0.050  | 0.028          | 0.021               | 0.023             | 0.299        | -0.020 | 0.066  | 0.028          | 0.021               | -0.007                 | 0.785        | -0.058 | 0.044  | 0.027          | 0.020               | 0.024               | 0.253        | -0.017 | 0.065  | 0.028          | 0.021               |
| <b>IL-6 (pg/mL)</b>           | -0.067                     | <b>0.001</b> | -0.108 | -0.026 | 0.028          | 0.021               | -0.077            | <b>0.009</b> | -0.135 | -0.019 | 0.026          | 0.019               | -0.098                 | <b>0.005</b> | -0.167 | -0.029 | 0.027          | 0.020               | -0.081              | <b>0.004</b> | -0.136 | -0.026 | 0.027          | 0.020               |
| <b>IL-1β (pg/mL)</b>          | -0.072                     | <b>0.000</b> | -0.107 | -0.037 | 0.023          | 0.016               | -0.110            | <b>0.000</b> | -0.159 | -0.060 | 0.024          | 0.018               | -0.119                 | <b>0.000</b> | -0.178 | -0.061 | 0.022          | 0.016               | -0.103              | <b>0.000</b> | -0.150 | -0.056 | 0.024          | 0.017               |
| <b>TNF-α (pg/mL)</b>          | -0.039                     | 0.066        | -0.080 | 0.003  | 0.026          | 0.019               | -0.059            | <b>0.045</b> | -0.117 | -0.001 | 0.026          | 0.019               | -0.078                 | <b>0.025</b> | -0.147 | -0.010 | 0.027          | 0.020               | -0.055              | <b>0.048</b> | -0.110 | 0.000  | 0.026          | 0.019               |
| <b>IL-10 (pg/mL)</b>          | 0.055                      | <b>0.016</b> | 0.010  | 0.100  | 0.034          | 0.027               | 0.090             | <b>0.005</b> | 0.027  | 0.153  | 0.035          | 0.028               | 0.078                  | <b>0.041</b> | 0.003  | 0.152  | 0.033          | 0.026               | 0.083               | <b>0.007</b> | 0.023  | 0.142  | 0.035          | 0.028               |
| <b>IL-4 (pg/mL)</b>           | -0.006                     | 0.845        | -0.070 | 0.057  | 0.017          | 0.011               | -0.014            | 0.766        | -0.103 | 0.075  | 0.018          | 0.011               | -0.119                 | <b>0.027</b> | -0.224 | -0.013 | 0.02           | 0.014               | -0.013              | 0.759        | -0.098 | 0.071  | 0.018          | 0.011               |
| <b>TAC (μM)</b>               | 0.073                      | <b>0.007</b> | 0.021  | 0.126  | 0.027          | 0.020               | 0.091             | <b>0.016</b> | 0.017  | 0.165  | 0.026          | 0.019               | 0.088                  | <b>0.049</b> | 0.000  | 0.177  | 0.025          | 0.018               | 0.091               | <b>0.011</b> | 0.021  | 0.162  | 0.026          | 0.020               |
| <b>MDA (μM)</b>               | 0.016                      | 0.405        | -0.022 | 0.055  | 0.014          | 0.008               | 0.005             | 0.843        | -0.048 | 0.059  | 0.014          | 0.007               | -0.037                 | 0.256        | -0.101 | 0.027  | 0.015          | 0.008               | 0.008               | 0.753        | -0.043 | 0.059  | 0.014          | 0.007               |
|                               | <b>Lutein + Zeaxanthin</b> |              |        |        |                |                     | <b>Lycopene</b>   |              |        |        |                |                     | <b>Phytoene</b>        |              |        |        |                |                     | <b>Phytofluene</b>  |              |        |        |                |                     |
|                               |                            |              | 95% CI |        |                |                     |                   |              | 95% CI |        |                |                     |                        |              | 95% CI |        |                |                     |                     |              | 95% CI |        |                |                     |
|                               | β                          | p-value      | Lower  | Upper  | R <sup>2</sup> | R <sup>2</sup> adj. | β                 | p-value      | Lower  | Upper  | R <sup>2</sup> | R <sup>2</sup> adj. | β                      | p-value      | Lower  | Upper  | R <sup>2</sup> | R <sup>2</sup> adj. | β                   | p-value      | Lower  | Upper  | R <sup>2</sup> | R <sup>2</sup> adj. |
| <b>BMI (kg/m<sup>2</sup>)</b> | 0.002                      | 0.793        | -0.012 | 0.015  | 0.019          | 0.012               | 0.004             | 0.431        | -0.007 | 0.015  | 0.019          | 0.013               | -0.008                 | 0.363        | -0.024 | 0.009  | 0.019          | 0.013               | -0.007              | 0.424        | -0.023 | 0.010  | 0.019          | 0.013               |
| <b>WC (cm)</b>                | -0.007                     | 0.360        | -0.023 | 0.008  | 0.254          | 0.249               | 0.013             | <b>0.049</b> | 0.000  | 0.026  | 0.255          | 0.250               | -0.005                 | 0.580        | -0.025 | 0.014  | 0.254          | 0.248               | -0.007              | 0.479        | -0.026 | 0.012  | 0.254          | 0.249               |
| <b>FBG (mg/dL)</b>            | 0.001                      | 0.926        | -0.016 | 0.017  | 0.004          | -0.002              | 0.009             | 0.204        | -0.005 | 0.022  | 0.005          | -0.001              | 0.006                  | 0.576        | -0.014 | 0.026  | 0.005          | -0.002              | 0.006               | 0.571        | -0.014 | 0.026  | 0.005          | -0.002              |
| <b>Insulin (mIU/mL)</b>       | 0.000                      | 0.995        | -0.059 | 0.058  | 0.007          | 0.000               | 0.006             | 0.817        | -0.042 | 0.053  | 0.007          | 0.000               | -0.027                 | 0.466        | -0.099 | 0.045  | 0.007          | 0.000               | -0.028              | 0.445        | -0.101 | 0.044  | 0.007          | 0.000               |
| <b>HOMA-IR</b>                | 0.001                      | 0.986        | -0.065 | 0.066  | 0.005          | -0.002              | 0.014             | 0.600        | -0.039 | 0.068  | 0.005          | -0.002              | -0.021                 | 0.611        | -0.102 | 0.060  | 0.005          | -0.002              | -0.022              | 0.590        | -0.104 | 0.059  | 0.005          | -0.002              |
| <b>HDL-c (mg/dL)</b>          | 0.024                      | 0.071        | -0.002 | 0.050  | 0.024          | 0.017               | 0.018             | 0.101        | -0.003 | 0.039  | 0.023          | 0.017               | 0.036                  | <b>0.026</b> | 0.004  | 0.068  | 0.025          | 0.018               | 0.035               | <b>0.033</b> | 0.003  | 0.067  | 0.025          | 0.018               |

## ARTICLE

## Journal Name

|                       |        |              |        |        |       |        |        |              |        |        |       |       |        |              |        |        |       |       |        |              |        |        |       |       |
|-----------------------|--------|--------------|--------|--------|-------|--------|--------|--------------|--------|--------|-------|-------|--------|--------------|--------|--------|-------|-------|--------|--------------|--------|--------|-------|-------|
| LDL-c (mg/dL)         | 0.005  | 0.712        | -0.023 | 0.033  | 0.01  | 0.003  | -0.005 | 0.642        | -0.028 | 0.017  | 0.01  | 0.004 | -0.018 | 0.311        | -0.052 | 0.017  | 0.011 | 0.004 | -0.018 | 0.312        | -0.053 | 0.017  | 0.011 | 0.004 |
| TC (mg/dL)            | 0.002  | 0.879        | -0.018 | 0.021  | 0.006 | -0.001 | -0.005 | 0.560        | -0.020 | 0.011  | 0.006 | 0.000 | -0.010 | 0.388        | -0.034 | 0.013  | 0.007 | 0.000 | -0.010 | 0.395        | -0.034 | 0.014  | 0.007 | 0.000 |
| TG (mg/dL)            | -0.033 | 0.195        | -0.082 | 0.017  | 0.013 | 0.006  | 0.007  | 0.719        | -0.033 | 0.048  | 0.012 | 0.005 | -0.027 | 0.377        | -0.088 | 0.033  | 0.012 | 0.005 | -0.028 | 0.364        | -0.090 | 0.033  | 0.012 | 0.005 |
| SBP (mmHg)            | -0.008 | 0.260        | -0.021 | 0.006  | 0.016 | 0.009  | 0.001  | 0.900        | -0.010 | 0.011  | 0.015 | 0.008 | 0.006  | 0.488        | -0.010 | 0.022  | 0.016 | 0.009 | 0.005  | 0.544        | -0.011 | 0.021  | 0.015 | 0.009 |
| DBP (mmHg)            | -0.006 | 0.359        | -0.019 | 0.007  | 0.02  | 0.014  | -0.006 | 0.250        | -0.017 | 0.004  | 0.021 | 0.014 | -0.004 | 0.655        | -0.020 | 0.012  | 0.02  | 0.013 | -0.004 | 0.626        | -0.020 | 0.012  | 0.02  | 0.013 |
| hs-CRP (mg/dL)        | -0.040 | 0.111        | -0.089 | 0.009  | 0.029 | 0.022  | 0.001  | 0.948        | -0.039 | 0.042  | 0.027 | 0.020 | -0.010 | 0.735        | -0.071 | 0.050  | 0.027 | 0.020 | -0.007 | 0.816        | -0.068 | 0.054  | 0.027 | 0.020 |
| IL-6 (pg/mL)          | -0.036 | 0.292        | -0.102 | 0.031  | 0.023 | 0.016  | -0.091 | <b>0.001</b> | -0.145 | -0.037 | 0.029 | 0.022 | -0.076 | 0.068        | -0.157 | 0.006  | 0.024 | 0.017 | -0.088 | <b>0.035</b> | -0.171 | -0.006 | 0.025 | 0.018 |
| IL-1 $\beta$ (pg/mL)  | -0.088 | <b>0.002</b> | -0.145 | -0.032 | 0.018 | 0.012  | -0.077 | <b>0.001</b> | -0.124 | -0.031 | 0.019 | 0.013 | -0.134 | <b>0.000</b> | -0.203 | -0.064 | 0.021 | 0.015 | -0.144 | <b>0.000</b> | -0.214 | -0.074 | 0.023 | 0.016 |
| TNF- $\alpha$ (pg/mL) | -0.059 | 0.080        | -0.125 | 0.007  | 0.026 | 0.019  | -0.094 | <b>0.001</b> | -0.148 | -0.040 | 0.031 | 0.024 | -0.046 | 0.261        | -0.127 | 0.034  | 0.024 | 0.018 | -0.048 | 0.248        | -0.130 | 0.034  | 0.024 | 0.018 |
| IL-10 (pg/mL)         | 0.085  | <b>0.020</b> | 0.013  | 0.157  | 0.033 | 0.027  | 0.045  | 0.130        | -0.013 | 0.104  | 0.032 | 0.025 | 0.079  | 0.080        | -0.009 | 0.167  | 0.032 | 0.025 | 0.081  | 0.075        | -0.008 | 0.170  | 0.032 | 0.025 |
| IL-4 (pg/mL)          | -0.054 | 0.296        | -0.156 | 0.047  | 0.018 | 0.011  | 0.006  | 0.889        | -0.077 | 0.089  | 0.017 | 0.011 | -0.079 | 0.212        | -0.204 | 0.045  | 0.018 | 0.012 | -0.082 | 0.202        | -0.208 | 0.044  | 0.018 | 0.012 |
| TAC ( $\mu$ M)        | 0.163  | <b>0.000</b> | 0.079  | 0.248  | 0.031 | 0.024  | 0.037  | 0.297        | -0.033 | 0.106  | 0.023 | 0.016 | 0.106  | <b>0.046</b> | 0.002  | 0.210  | 0.025 | 0.018 | 0.111  | <b>0.038</b> | 0.006  | 0.216  | 0.025 | 0.018 |
| MDA ( $\mu$ M)        | -0.017 | 0.586        | -0.079 | 0.044  | 0.014 | 0.007  | 0.015  | 0.561        | -0.035 | 0.065  | 0.014 | 0.007 | 0.017  | 0.652        | -0.058 | 0.093  | 0.014 | 0.007 | 0.020  | 0.610        | -0.056 | 0.096  | 0.014 | 0.007 |

## Violaxanthin

## Neoxanthin

## Astaxanthin

## 95% CI

## 95% CI

## 95% CI

|                          | Violaxanthin |              | Neoxanthin |        |                |                     | Astaxanthin |              |        |        |                |                     |         |         |        |       |                |                     |
|--------------------------|--------------|--------------|------------|--------|----------------|---------------------|-------------|--------------|--------|--------|----------------|---------------------|---------|---------|--------|-------|----------------|---------------------|
|                          | $\beta$      | p-value      | Lower      | Upper  | R <sup>2</sup> | R <sup>2</sup> adj. | $\beta$     | p-value      | Lower  | Upper  | R <sup>2</sup> | R <sup>2</sup> adj. | $\beta$ | p-value | Lower  | Upper | R <sup>2</sup> | R <sup>2</sup> adj. |
| BMI (kg/m <sup>2</sup> ) | -0.003       | 0.785        | -0.021     | 0.016  | 0.019          | 0.012               | 0.002       | 0.787        | -0.015 | 0.020  | 0.019          | 0.012               | -0.001  | 0.561   | -0.005 | 0.002 | 0.019          | 0.013               |
| WC (cm)                  | -0.005       | 0.672        | -0.026     | 0.016  | 0.254          | 0.248               | -0.005      | 0.611        | -0.026 | 0.015  | 0.254          | 0.248               | -0.002  | 0.427   | -0.006 | 0.002 | 0.254          | 0.249               |
| FBG (mg/dL)              | -0.011       | 0.338        | -0.033     | 0.011  | 0.005          | -0.002              | -0.015      | 0.163        | -0.037 | 0.006  | 0.006          | -0.001              | -0.001  | 0.705   | -0.005 | 0.003 | 0.005          | -0.002              |
| Insulin (mIU/mL)         | 0.020        | 0.614        | -0.059     | 0.099  | 0.007          | 0.000               | 0.002       | 0.956        | -0.074 | 0.079  | 0.007          | 0.000               | 0.008   | 0.289   | -0.007 | 0.024 | 0.007          | 0.001               |
| HOMA-IR                  | 0.009        | 0.835        | -0.079     | 0.098  | 0.005          | -0.002              | -0.013      | 0.764        | -0.099 | 0.073  | 0.005          | -0.002              | 0.007   | 0.396   | -0.010 | 0.025 | 0.005          | -0.002              |
| HDL-c (mg/dL)            | 0.012        | 0.488        | -0.022     | 0.047  | 0.022          | 0.015               | 0.007       | 0.664        | -0.026 | 0.041  | 0.022          | 0.015               | 0.001   | 0.690   | -0.005 | 0.008 | 0.022          | 0.015               |
| LDL-c (mg/dL)            | 0.010        | 0.587        | -0.027     | 0.048  | 0.01           | 0.004               | 0.003       | 0.882        | -0.034 | 0.039  | 0.01           | 0.003               | 0.001   | 0.705   | -0.006 | 0.009 | 0.01           | 0.003               |
| TC (mg/dL)               | -0.004       | 0.756        | -0.030     | 0.022  | 0.006          | -0.001              | -0.011      | 0.407        | -0.036 | 0.015  | 0.007          | 0.000               | -0.001  | 0.770   | -0.006 | 0.004 | 0.006          | -0.001              |
| TG (mg/dL)               | -0.045       | 0.186        | -0.112     | 0.022  | 0.013          | 0.006               | -0.045      | 0.169        | -0.110 | 0.019  | 0.013          | 0.006               | -0.007  | 0.318   | -0.020 | 0.006 | 0.012          | 0.006               |
| SBP (mmHg)               | -0.015       | 0.094        | -0.033     | 0.003  | 0.017          | 0.010               | -0.016      | 0.077        | -0.033 | 0.002  | 0.017          | 0.010               | 0.000   | 0.807   | -0.003 | 0.004 | 0.015          | 0.008               |
| DBP (mmHg)               | -0.013       | 0.139        | -0.031     | 0.004  | 0.021          | 0.014               | -0.006      | 0.508        | -0.023 | 0.011  | 0.02           | 0.013               | -0.002  | 0.359   | -0.005 | 0.002 | 0.02           | 0.014               |
| hs-CRP (mg/dL)           | -0.019       | 0.574        | -0.085     | 0.047  | 0.027          | 0.021               | -0.012      | 0.707        | -0.077 | 0.052  | 0.027          | 0.020               | 0.000   | 0.992   | -0.013 | 0.013 | 0.027          | 0.020               |
| IL-6 (pg/mL)             | -0.057       | 0.215        | -0.146     | 0.033  | 0.023          | 0.016               | -0.063      | 0.153        | -0.150 | 0.024  | 0.023          | 0.016               | -0.002  | 0.818   | -0.020 | 0.015 | 0.022          | 0.015               |
| IL-1 $\beta$ (pg/mL)     | -0.116       | <b>0.003</b> | -0.193     | -0.040 | 0.018          | 0.011               | -0.113      | <b>0.003</b> | -0.188 | -0.039 | 0.018          | 0.012               | -0.008  | 0.315   | -0.023 | 0.007 | 0.013          | 0.007               |
| TNF- $\alpha$ (pg/mL)    | -0.006       | 0.903        | -0.094     | 0.083  | 0.024          | 0.017               | 0.001       | 0.982        | -0.085 | 0.087  | 0.024          | 0.017               | 0.008   | 0.375   | -0.009 | 0.025 | 0.024          | 0.017               |
| IL-10 (pg/mL)            | 0.129        | <b>0.009</b> | 0.032      | 0.225  | 0.034          | 0.028               | 0.144       | <b>0.003</b> | 0.050  | 0.238  | 0.036          | 0.029               | -0.006  | 0.556   | -0.025 | 0.013 | 0.03           | 0.024               |
| IL-4 (pg/mL)             | -0.077       | 0.269        | -0.214     | 0.060  | 0.018          | 0.011               | -0.080      | 0.238        | -0.213 | 0.053  | 0.018          | 0.012               | -0.017  | 0.216   | -0.044 | 0.010 | 0.018          | 0.012               |



|                          | 0.245            | <b>0.000</b> | 0.131  | 0.359  | 0.033          | 0.026               | 0.283             | <b>0.000</b> | 0.172  | 0.393  | 0.038          | 0.031               | 0.004 | 0.724 | -0.018 | 0.026 | 0.022 | 0.016 |
|--------------------------|------------------|--------------|--------|--------|----------------|---------------------|-------------------|--------------|--------|--------|----------------|---------------------|-------|-------|--------|-------|-------|-------|
| TAC ( $\mu\text{M}$ )    |                  |              |        |        |                |                     |                   |              |        |        |                |                     |       |       |        |       |       |       |
| MDA ( $\mu\text{M}$ )    | 0.000            | 0.995        | -0.083 | 0.083  | 0.014          | 0.007               | 0.014             | 0.737        | -0.067 | 0.094  | 0.014          | 0.007               | 0.007 | 0.401 | -0.009 | 0.023 | 0.014 | 0.008 |
|                          | Non-Provitamin A |              |        |        |                |                     | Total Carotenoids |              |        |        |                |                     |       |       |        |       |       |       |
|                          | 95% CI           |              |        |        |                |                     | 95% CI            |              |        |        |                |                     |       |       |        |       |       |       |
|                          | $\beta$          | p-value      | Lower  | Upper  | R <sup>2</sup> | R <sup>2</sup> adj. | $\beta$           | p-value      | Lower  | Upper  | R <sup>2</sup> | R <sup>2</sup> adj. |       |       |        |       |       |       |
| BMI (kg/m <sup>2</sup> ) | -0.002           | 0.841        | -0.020 | 0.017  | 0.019          | 0.012               | -0.009            | 0.288        | -0.025 | 0.007  | 0.019          | 0.013               |       |       |        |       |       |       |
| WC (cm)                  | 0.006            | 0.582        | -0.015 | 0.027  | 0.254          | 0.248               | -0.007            | 0.459        | -0.026 | 0.012  | 0.254          | 0.249               |       |       |        |       |       |       |
| FBG (mg/dL)              | 0.009            | 0.451        | -0.014 | 0.031  | 0.005          | -0.002              | 0.012             | 0.244        | -0.008 | 0.032  | 0.005          | -0.002              |       |       |        |       |       |       |
| Insulin (mIU/mL)         | -0.014           | 0.725        | -0.094 | 0.066  | 0.007          | 0.000               | -0.021            | 0.555        | -0.093 | 0.050  | 0.007          | 0.000               |       |       |        |       |       |       |
| HOMA IR                  | -0.006           | 0.901        | -0.095 | 0.084  | 0.005          | -0.002              | -0.010            | 0.816        | -0.090 | 0.071  | 0.005          | -0.002              |       |       |        |       |       |       |
| HDL-c (mg/dL)            | 0.040            | <b>0.025</b> | 0.005  | 0.076  | 0.025          | 0.018               | 0.016             | 0.306        | -0.015 | 0.048  | 0.022          | 0.016               |       |       |        |       |       |       |
| LDL-c (mg/dL)            | -0.011           | 0.587        | -0.049 | 0.028  | 0.01           | 0.004               | -0.011            | 0.530        | -0.045 | 0.023  | 0.01           | 0.004               |       |       |        |       |       |       |
| TC (mg/dL)               | -0.009           | 0.492        | -0.036 | 0.017  | 0.007          | 0.000               | -0.007            | 0.538        | -0.031 | 0.016  | 0.006          | 0.000               |       |       |        |       |       |       |
| TG (mg/dL)               | -0.022           | 0.533        | -0.089 | 0.046  | 0.012          | 0.005               | -0.012            | 0.695        | -0.072 | 0.048  | 0.012          | 0.005               |       |       |        |       |       |       |
| SBP (mmHg)               | 0.001            | 0.921        | -0.017 | 0.019  | 0.015          | 0.008               | -0.003            | 0.674        | -0.020 | 0.013  | 0.015          | 0.009               |       |       |        |       |       |       |
| DBP (mmHg)               | -0.009           | 0.309        | -0.027 | 0.009  | 0.02           | 0.014               | -0.008            | 0.349        | -0.023 | 0.008  | 0.02           | 0.014               |       |       |        |       |       |       |
| hs-CRP (mg/dL)           | -0.022           | 0.521        | -0.089 | 0.045  | 0.027          | 0.021               | 0.014             | 0.653        | -0.046 | 0.074  | 0.027          | 0.021               |       |       |        |       |       |       |
| IL-6 (pg/mL)             | -0.112           | <b>0.016</b> | -0.202 | -0.021 | 0.025          | 0.019               | -0.120            | <b>0.004</b> | -0.200 | -0.039 | 0.027          | 0.020               |       |       |        |       |       |       |
| IL-1 $\beta$ (pg/mL)     | -0.170           | <b>0.000</b> | -0.247 | -0.093 | 0.024          | 0.017               | -0.177            | <b>0.000</b> | -0.245 | -0.108 | 0.028          | 0.022               |       |       |        |       |       |       |
| TNF- $\alpha$ (pg/mL)    | -0.100           | <b>0.030</b> | -0.189 | -0.010 | 0.027          | 0.020               | -0.102            | <b>0.013</b> | -0.182 | -0.022 | 0.027          | 0.021               |       |       |        |       |       |       |
| IL-10 (pg/mL)            | 0.107            | <b>0.033</b> | 0.008  | 0.205  | 0.033          | 0.026               | 0.140             | <b>0.002</b> | 0.053  | 0.227  | 0.036          | 0.030               |       |       |        |       |       |       |
| IL-4 (pg/mL)             | -0.062           | 0.379        | -0.201 | 0.076  | 0.018          | 0.011               | -0.024            | 0.703        | -0.148 | 0.100  | 0.018          | 0.011               |       |       |        |       |       |       |
| TAC ( $\mu\text{M}$ )    | 0.152            | <b>0.010</b> | 0.036  | 0.268  | 0.026          | 0.020               | 0.163             | <b>0.002</b> | 0.060  | 0.267  | 0.028          | 0.021               |       |       |        |       |       |       |
| MDA ( $\mu\text{M}$ )    | 0.018            | 0.679        | -0.066 | 0.102  | 0.014          | 0.007               | 0.017             | 0.654        | -0.058 | 0.092  | 0.014          | 0.007               |       |       |        |       |       |       |

\*Multiple linear regression models were used to assess the associations between carotenoids and a selected list of biomarkers relevant to cardiometabolic health, inflammatory status, and oxidative stress. Model 2 was adjusted for the following variables: age (y), sex (male/ female), marital status (married/ single/ other), education level (having diploma or low literacy/ higher than diploma), smoking status (yes/no), disease history (yes/no for cardiovascular disease, diabetes, and hypertension). BMI (kg/m<sup>2</sup>) was also included as an explanatory variable, in models where it was not the dependent variable. All continuous variables were log-transformed. Carotenoids were adjusted for total energy intake ( $\mu\text{g}/1000$  kcal) prior to log-transformation.

Statistically significant p-values ( $p < 0.05$ ) are shown in **bold**.

Abbreviations: BMI = body mass index, HDL-c = high-density lipoprotein cholesterol, LDL-c = low-density lipoprotein cholesterol, SBP = systolic blood pressure, DBP = diastolic blood pressure, hs-CRP = high-sensitivity C-reactive protein, IL = interleukin, TNF- $\alpha$  = tumor necrosis factor  $\alpha$ , TAC = total antioxidant capacity, MDA = malondialdehyde, WC = waist circumference, FBG = fasting blood glucose, TC = total cholesterol, TG = triglycerides.

**Supplementary Table 12:** Association between dietary carotenoid intake and biomarkers in overweight/obese and normal-weight groups Based on BMI\*.

|                                        | $\alpha$ -Carotene |              |        |        |                |                     | $\beta$ -Carotene |              |        |        |                |                     | $\beta$ -Cryptoxanthin |              |        |        | Provitamin A   |                     |         |              |        |        |                |                     |
|----------------------------------------|--------------------|--------------|--------|--------|----------------|---------------------|-------------------|--------------|--------|--------|----------------|---------------------|------------------------|--------------|--------|--------|----------------|---------------------|---------|--------------|--------|--------|----------------|---------------------|
|                                        |                    |              | 95% CI |        | R <sup>2</sup> | R <sup>2</sup> adj. |                   |              | 95% CI |        | R <sup>2</sup> | R <sup>2</sup> adj. |                        |              | 95% CI |        | R <sup>2</sup> | R <sup>2</sup> adj. |         |              | 95% CI |        | R <sup>2</sup> | R <sup>2</sup> adj. |
|                                        | $\beta$            | p-value      | Lower  | Upper  |                |                     | $\beta$           | p-value      | Lower  | Upper  |                |                     | $\beta$                | p-value      | Lower  | Upper  |                |                     | $\beta$ | p-value      | Lower  | Upper  |                |                     |
| <b>BMI (kg/m<sup>2</sup>)</b>          | 0.004              | 0.110        | -0.001 | 0.008  | 0.075          | 0.061               | 0.001             | 0.673        | -0.005 | 0.008  | 0.072          | 0.058               | 0.000                  | 0.923        | -0.007 | 0.008  | 0.072          | 0.058               | 0.003   | 0.312        | -0.003 | 0.009  | 0.073          | 0.059               |
|                                        | 0.001              | 0.836        | -0.006 | 0.008  | 0.059          | 0.047               | 0.005             | 0.377        | -0.006 | 0.015  | 0.060          | 0.048               | 0.006                  | 0.390        | -0.007 | 0.018  | 0.060          | 0.048               | 0.003   | 0.496        | -0.006 | 0.013  | 0.060          | 0.047               |
| <b>WC (cm)</b>                         | -0.006             | 0.456        | -0.021 | 0.009  | 0.018          | 0.002               | -0.009            | 0.398        | -0.030 | 0.012  | 0.018          | 0.002               | -0.004                 | 0.752        | -0.030 | 0.022  | 0.017          | 0.001               | -0.009  | 0.361        | -0.030 | 0.011  | 0.018          | 0.002               |
|                                        | -0.005             | 0.389        | -0.017 | 0.006  | 0.304          | 0.294               | -0.007            | 0.414        | -0.024 | 0.010  | 0.304          | 0.294               | -0.002                 | 0.846        | -0.023 | 0.019  | 0.303          | 0.293               | -0.007  | 0.411        | -0.022 | 0.009  | 0.304          | 0.294               |
| <b>FBG (mg/dL)</b>                     | 0.013              | 0.060        | -0.001 | 0.027  | 0.013          | -0.003              | 0.008             | 0.420        | -0.011 | 0.027  | 0.009          | -0.007              | 0.010                  | 0.396        | -0.014 | 0.035  | 0.010          | -0.006              | 0.012   | 0.224        | -0.007 | 0.030  | 0.011          | -0.005              |
|                                        | 0.004              | 0.594        | -0.011 | 0.020  | 0.025          | 0.011               | 0.009             | 0.449        | -0.014 | 0.032  | 0.026          | 0.012               | 0.002                  | 0.899        | -0.026 | 0.030  | 0.025          | 0.011               | 0.008   | 0.480        | -0.013 | 0.028  | 0.026          | 0.012               |
| <b>Insulin (mIU/mL)</b>                | 0.037              | 0.163        | -0.015 | 0.089  | 0.019          | 0.003               | 0.016             | 0.664        | -0.057 | 0.089  | 0.017          | 0.001               | 0.014                  | 0.767        | -0.077 | 0.104  | 0.017          | 0.001               | 0.033   | 0.355        | -0.037 | 0.103  | 0.018          | 0.002               |
|                                        | -0.039             | 0.154        | -0.092 | 0.015  | 0.016          | 0.002               | -0.038            | 0.348        | -0.116 | 0.041  | 0.015          | 0.001               | 0.027                  | 0.586        | -0.070 | 0.124  | 0.014          | 0.000               | -0.040  | 0.282        | -0.112 | 0.033  | 0.015          | 0.001               |
| <b>HOMA-IR (%)</b>                     | 0.050              | 0.089        | -0.008 | 0.109  | 0.019          | 0.003               | 0.024             | 0.560        | -0.057 | 0.105  | 0.015          | -0.001              | 0.024                  | 0.639        | -0.077 | 0.125  | 0.015          | -0.001              | 0.045   | 0.262        | -0.034 | 0.123  | 0.016          | 0.000               |
|                                        | -0.034             | 0.261        | -0.094 | 0.026  | 0.011          | -0.003              | -0.029            | 0.524        | -0.118 | 0.060  | 0.010          | -0.004              | 0.029                  | 0.607        | -0.081 | 0.139  | 0.010          | -0.004              | -0.032  | 0.441        | -0.114 | 0.050  | 0.010          | -0.004              |
| <b>HDL-c (mg/dL)</b>                   | -0.010             | 0.405        | -0.033 | 0.013  | 0.020          | 0.004               | -0.029            | 0.085        | -0.061 | 0.004  | 0.023          | 0.007               | 0.023                  | 0.276        | -0.018 | 0.063  | 0.021          | 0.005               | -0.023  | 0.148        | -0.055 | 0.008  | 0.022          | 0.006               |
|                                        | 0.004              | 0.707        | -0.019 | 0.027  | 0.021          | 0.007               | 0.012             | 0.478        | -0.022 | 0.046  | 0.021          | 0.007               | 0.004                  | 0.851        | -0.038 | 0.046  | 0.020          | 0.006               | 0.010   | 0.550        | -0.022 | 0.041  | 0.021          | 0.007               |
| <b>LDL-c (mg/dL)</b>                   | -0.014             | 0.293        | -0.041 | 0.012  | 0.017          | 0.001               | -0.011            | 0.574        | -0.047 | 0.026  | 0.016          | 0.000               | 0.003                  | 0.910        | -0.043 | 0.048  | 0.016          | 0.000               | -0.013  | 0.459        | -0.049 | 0.022  | 0.016          | 0.000               |
|                                        | -0.003             | 0.827        | -0.027 | 0.022  | 0.028          | 0.015               | 0.006             | 0.727        | -0.030 | 0.042  | 0.029          | 0.015               | -0.002                 | 0.944        | -0.046 | 0.043  | 0.028          | 0.014               | 0.003   | 0.856        | -0.030 | 0.036  | 0.028          | 0.015               |
| <b>TC (mg/dL)</b>                      | -0.006             | 0.491        | -0.025 | 0.012  | 0.016          | 0.000               | 0.001             | 0.960        | -0.025 | 0.026  | 0.015          | -0.001              | -0.015                 | 0.363        | -0.046 | 0.017  | 0.017          | 0.001               | -0.002  | 0.879        | -0.026 | 0.023  | 0.015          | 0.000               |
|                                        | -0.004             | 0.643        | -0.021 | 0.013  | 0.009          | -0.005              | 0.000             | 0.990        | -0.025 | 0.025  | 0.008          | -0.006              | 0.010                  | 0.508        | -0.020 | 0.041  | 0.009          | -0.005              | -0.002  | 0.889        | -0.024 | 0.021  | 0.009          | -0.006              |
| <b>TG (mg/dL)</b>                      | -0.017             | 0.493        | -0.067 | 0.032  | 0.010          | -0.006              | 0.005             | 0.881        | -0.064 | 0.074  | 0.009          | -0.007              | -0.067                 | 0.126        | -0.152 | 0.019  | 0.013          | -0.003              | -0.005  | 0.872        | -0.072 | 0.061  | 0.010          | -0.007              |
|                                        | 0.000              | 0.991        | -0.041 | 0.040  | 0.023          | 0.009               | 0.000             | 0.989        | -0.059 | 0.060  | 0.023          | 0.009               | 0.019                  | 0.615        | -0.055 | 0.093  | 0.023          | 0.009               | 0.001   | 0.964        | -0.054 | 0.056  | 0.023          | 0.009               |
| <b>SBP (mmHg)</b>                      | -0.007             | 0.237        | -0.018 | 0.004  | 0.007          | -0.009              | -0.013            | 0.109        | -0.028 | 0.003  | 0.008          | -0.008              | -0.024                 | <b>0.014</b> | -0.043 | -0.005 | 0.013          | -0.003              | -0.013  | 0.101        | -0.028 | 0.002  | 0.009          | -0.008              |
|                                        | 0.000              | 0.974        | -0.012 | 0.013  | 0.033          | 0.019               | 0.003             | 0.725        | -0.015 | 0.022  | 0.033          | 0.019               | -0.006                 | 0.604        | -0.029 | 0.017  | 0.033          | 0.020               | 0.002   | 0.798        | -0.015 | 0.019  | 0.033          | 0.019               |
| <b>DBP (mmHg)</b>                      | -0.004             | 0.543        | -0.015 | 0.008  | 0.011          | -0.005              | -0.009            | 0.295        | -0.025 | 0.008  | 0.012          | -0.004              | -0.024                 | <b>0.020</b> | -0.044 | -0.004 | 0.018          | 0.002               | -0.008  | 0.314        | -0.024 | 0.008  | 0.012          | -0.004              |
|                                        | 0.000              | 0.955        | -0.012 | 0.011  | 0.048          | 0.035               | -0.001            | 0.935        | -0.018 | 0.017  | 0.048          | 0.035               | -0.012                 | 0.279        | -0.033 | 0.010  | 0.050          | 0.036               | -0.001  | 0.940        | -0.017 | 0.015  | 0.048          | 0.035               |
| <b>hs-CRP (mg/dL)</b>                  | 0.031              | 0.221        | -0.019 | 0.081  | 0.029          | 0.013               | 0.051             | 0.149        | -0.018 | 0.121  | 0.029          | 0.014               | 0.049                  | 0.269        | -0.038 | 0.135  | 0.028          | 0.012               | 0.051   | 0.134        | -0.016 | 0.118  | 0.029          | 0.014               |
|                                        | 0.021              | 0.297        | -0.019 | 0.061  | 0.026          | 0.012               | 0.023             | 0.445        | -0.036 | 0.082  | 0.026          | 0.012               | -0.023                 | 0.538        | -0.096 | 0.050  | 0.025          | 0.011               | 0.023   | 0.405        | -0.031 | 0.077  | 0.026          | 0.012               |
| <b>IL-6 (pg/mL)</b>                    | -0.030             | 0.392        | -0.097 | 0.038  | 0.010          | -0.006              | 0.011             | 0.821        | -0.083 | 0.105  | 0.009          | -0.007              | 0.020                  | 0.736        | -0.097 | 0.137  | 0.010          | -0.007              | -0.006  | 0.897        | -0.097 | 0.085  | 0.009          | -0.007              |
|                                        | -0.083             | <b>0.002</b> | -0.135 | -0.031 | 0.080          | 0.067               | -0.121            | <b>0.002</b> | -0.199 | -0.043 | 0.080          | 0.067               | -0.159                 | <b>0.001</b> | -0.255 | -0.063 | 0.081          | 0.068               | -0.113  | <b>0.002</b> | -0.185 | -0.042 | 0.080          | 0.067               |
| <b>IL-1 <math>\beta</math> (pg/mL)</b> | -0.055             | <b>0.045</b> | -0.109 | -0.001 | 0.035          | 0.019               | -0.071            | 0.065        | -0.145 | 0.004  | 0.034          | 0.018               | 0.040                  | 0.403        | -0.053 | 0.133  | 0.030          | 0.015               | -0.073  | <b>0.049</b> | -0.145 | 0.000  | 0.035          | 0.019               |
|                                        | -0.056             | <b>0.020</b> | -0.103 | -0.009 | 0.104          | 0.092               | -0.079            | <b>0.027</b> | -0.149 | -0.009 | 0.104          | 0.091               | -0.165                 | <b>0.000</b> | -0.251 | -0.080 | 0.114          | 0.101               | -0.074  | <b>0.024</b> | -0.138 | -0.010 | 0.104          | 0.091               |
| <b>TNF-<math>\alpha</math> (pg/mL)</b> | -0.027             | 0.394        | -0.090 | 0.036  | 0.036          | 0.021               | -0.034            | 0.453        | -0.122 | 0.054  | 0.036          | 0.020               | 0.022                  | 0.688        | -0.087 | 0.132  | 0.035          | 0.020               | -0.034  | 0.429        | -0.119 | 0.051  | 0.036          | 0.020               |
|                                        | -0.048             | 0.092        | -0.104 | 0.008  | 0.031          | 0.017               | -0.080            | 0.059        | -0.163 | 0.003  | 0.032          | 0.018               | -0.176                 | <b>0.001</b> | -0.278 | -0.073 | 0.041          | 0.027               | -0.073  | 0.062        | -0.149 | 0.004  | 0.032          | 0.018               |

|                          |                     |              |        |       |                |                     |          |              |        |       |                |                     |          |              |        |       |                |                     |        |              |        |       |                |                     |
|--------------------------|---------------------|--------------|--------|-------|----------------|---------------------|----------|--------------|--------|-------|----------------|---------------------|----------|--------------|--------|-------|----------------|---------------------|--------|--------------|--------|-------|----------------|---------------------|
| IL-10 (pg/mL)            | 0.041               | 0.215        | -0.024 | 0.106 | 0.044          | 0.029               | 0.049    | 0.284        | -0.041 | 0.139 | 0.044          | 0.028               | 0.035    | 0.544        | -0.077 | 0.147 | 0.043          | 0.027               | 0.048  | 0.283        | -0.039 | 0.135 | 0.044          | 0.028               |
|                          | 0.061               | 0.065        | -0.004 | 0.125 | 0.048          | 0.035               | 0.112    | <b>0.021</b> | 0.017  | 0.208 | 0.051          | 0.037               | 0.099    | 0.101        | -0.019 | 0.217 | 0.048          | 0.034               | 0.100  | <b>0.025</b> | 0.013  | 0.188 | 0.050          | 0.037               |
| IL-4 (pg/mL)             | 0.039               | 0.461        | -0.064 | 0.141 | 0.035          | 0.020               | 0.037    | 0.615        | -0.107 | 0.180 | 0.035          | 0.019               | -0.145   | 0.109        | -0.323 | 0.033 | 0.038          | 0.022               | 0.041  | 0.564        | -0.098 | 0.179 | 0.035          | 0.019               |
|                          | -0.021              | 0.616        | -0.102 | 0.060 | 0.033          | 0.019               | -0.015   | 0.811        | -0.135 | 0.106 | 0.032          | 0.019               | -0.066   | 0.383        | -0.215 | 0.082 | 0.033          | 0.019               | -0.020 | 0.726        | -0.130 | 0.091 | 0.033          | 0.019               |
| TAC (μM)                 | 0.063               | 0.112        | -0.015 | 0.141 | 0.024          | 0.008               | 0.035    | 0.522        | -0.073 | 0.144 | 0.021          | 0.005               | 0.041    | 0.548        | -0.094 | 0.176 | 0.021          | 0.005               | 0.053  | 0.321        | -0.052 | 0.158 | 0.022          | 0.006               |
|                          | 0.065               | 0.092        | -0.011 | 0.141 | 0.028          | 0.014               | 0.112    | 0.050        | 0.000  | 0.224 | 0.029          | 0.015               | 0.084    | 0.238        | -0.055 | 0.223 | 0.026          | 0.012               | 0.098  | 0.063        | -0.005 | 0.201 | 0.028          | 0.015               |
| MDA (μM)                 | 0.020               | 0.488        | -0.036 | 0.075 | 0.034          | 0.018               | 0.033    | 0.407        | -0.045 | 0.110 | 0.034          | 0.018               | -0.075   | 0.123        | -0.171 | 0.020 | 0.036          | 0.021               | 0.027  | 0.475        | -0.047 | 0.101 | 0.034          | 0.018               |
|                          | 0.011               | 0.689        | -0.044 | 0.066 | 0.034          | 0.020               | -0.021   | 0.620        | -0.102 | 0.061 | 0.034          | 0.021               | 0.001    | 0.990        | -0.100 | 0.102 | 0.034          | 0.020               | -0.011 | 0.780        | -0.086 | 0.064 | 0.034          | 0.020               |
|                          | Lutein + zeaxanthin |              |        |       |                |                     | Lycopene |              |        |       |                |                     | Phytoene |              |        |       | Phytofluene    |                     |        |              |        |       |                |                     |
|                          | β                   |              | 95% CI |       | R <sup>2</sup> |                     | β        |              | 95% CI |       | R <sup>2</sup> |                     | β        |              | 95% CI |       | R <sup>2</sup> |                     | β      |              | 95% CI |       | R <sup>2</sup> |                     |
|                          | β                   | p-value      | Lower  | Upper | R <sup>2</sup> | R <sup>2</sup> adj. | β        | p-value      | Lower  | Upper | R <sup>2</sup> | R <sup>2</sup> adj. | β        | p-value      | Lower  | Upper | R <sup>2</sup> | R <sup>2</sup> adj. | β      | p-value      | Lower  | Upper | R <sup>2</sup> | R <sup>2</sup> adj. |
| BMI (kg/m <sup>2</sup> ) | 0.004               | 0.258        | -0.003 | 0.012 | 0.073          | 0.060               | 0.002    | 0.463        | -0.004 | 0.008 | 0.073          | 0.059               | 0.008    | 0.150        | -0.003 | 0.018 | 0.074          | 0.061               | 0.007  | 0.161        | -0.003 | 0.018 | 0.074          | 0.061               |
|                          | 0.020               | <b>0.001</b> | 0.008  | 0.032 | 0.072          | 0.060               | 0.000    | 0.984        | -0.010 | 0.010 | 0.059          | 0.047               | 0.021    | <b>0.014</b> | 0.004  | 0.039 | 0.066          | 0.054               | 0.021  | <b>0.015</b> | 0.004  | 0.038 | 0.066          | 0.054               |
| WC (cm)                  | 0.006               | 0.629        | -0.019 | 0.031 | 0.017          | 0.002               | 0.012    | 0.246        | -0.008 | 0.033 | 0.019          | 0.003               | 0.024    | 0.166        | -0.010 | 0.059 | 0.020          | 0.004               | 0.022  | 0.207        | -0.012 | 0.057 | 0.019          | 0.003               |
|                          | -0.005              | 0.598        | -0.025 | 0.015 | 0.303          | 0.294               | 0.021    | <b>0.009</b> | 0.005  | 0.038 | 0.309          | 0.299               | -0.009   | 0.558        | -0.037 | 0.020 | 0.304          | 0.294               | -0.011 | 0.454        | -0.040 | 0.018 | 0.304          | 0.294               |
| FBG (mg/dL)              | -0.001              | 0.956        | -0.024 | 0.022 | 0.009          | -0.007              | 0.005    | 0.641        | -0.015 | 0.024 | 0.009          | -0.007              | 0.017    | 0.297        | -0.015 | 0.049 | 0.010          | -0.006              | 0.019  | 0.248        | -0.013 | 0.051 | 0.010          | -0.006              |
|                          | 0.010               | 0.441        | -0.016 | 0.037 | 0.026          | 0.012               | 0.015    | 0.169        | -0.006 | 0.036 | 0.027          | 0.013               | 0.013    | 0.499        | -0.025 | 0.051 | 0.025          | 0.012               | 0.011  | 0.567        | -0.027 | 0.049 | 0.025          | 0.011               |
| Insulin (mIU/mL)         | 0.005               | 0.912        | -0.081 | 0.091 | 0.017          | 0.001               | 0.045    | 0.220        | -0.027 | 0.116 | 0.019          | 0.003               | 0.021    | 0.734        | -0.100 | 0.141 | 0.017          | 0.001               | 0.023  | 0.709        | -0.097 | 0.143 | 0.017          | 0.001               |
|                          | 0.053               | 0.257        | -0.039 | 0.144 | 0.015          | 0.001               | 0.018    | 0.631        | -0.056 | 0.092 | 0.014          | 0.000               | 0.044    | 0.517        | -0.089 | 0.176 | 0.014          | 0.000               | 0.033  | 0.621        | -0.099 | 0.166 | 0.014          | 0.000               |
| HOMA-IR (%)              | 0.004               | 0.932        | -0.092 | 0.100 | 0.015          | -0.001              | 0.049    | 0.226        | -0.030 | 0.129 | 0.017          | 0.001               | 0.038    | 0.579        | -0.096 | 0.172 | 0.015          | -0.001              | 0.042  | 0.541        | -0.092 | 0.176 | 0.015          | -0.001              |
|                          | 0.063               | 0.230        | -0.040 | 0.166 | 0.011          | -0.003              | 0.033    | 0.437        | -0.051 | 0.117 | 0.010          | -0.004              | 0.057    | 0.455        | -0.093 | 0.206 | 0.010          | -0.004              | 0.044  | 0.559        | -0.105 | 0.194 | 0.010          | -0.004              |
| HDL-c (mg/dL)            | 0.024               | 0.227        | -0.015 | 0.062 | 0.021          | 0.005               | 0.013    | 0.442        | -0.019 | 0.045 | 0.020          | 0.004               | 0.016    | 0.557        | -0.038 | 0.070 | 0.020          | 0.004               | 0.014  | 0.622        | -0.040 | 0.068 | 0.019          | 0.004               |
|                          | 0.015               | 0.458        | -0.025 | 0.054 | 0.021          | 0.007               | 0.028    | 0.087        | -0.004 | 0.060 | 0.024          | 0.010               | 0.069    | <b>0.018</b> | 0.012  | 0.126 | 0.027          | 0.013               | 0.066  | <b>0.022</b> | 0.009  | 0.123 | 0.026          | 0.013               |
| LDL-c (mg/dL)            | -0.002              | 0.941        | -0.045 | 0.042 | 0.016          | 0.000               | -0.017   | 0.349        | -0.053 | 0.019 | 0.017          | 0.001               | -0.022   | 0.480        | -0.083 | 0.039 | 0.016          | 0.000               | -0.020 | 0.517        | -0.081 | 0.041 | 0.016          | 0.000               |
|                          | 0.032               | 0.133        | -0.010 | 0.074 | 0.031          | 0.017               | 0.008    | 0.652        | -0.026 | 0.042 | 0.029          | 0.015               | 0.003    | 0.932        | -0.058 | 0.063 | 0.028          | 0.014               | 0.000  | 0.988        | -0.060 | 0.061 | 0.028          | 0.014               |
| TC (mg/dL)               | 0.002               | 0.907        | -0.028 | 0.032 | 0.015          | -0.001              | -0.005   | 0.698        | -0.030 | 0.020 | 0.016          | 0.000               | -0.010   | 0.655        | -0.052 | 0.032 | 0.016          | 0.000               | -0.010 | 0.633        | -0.052 | 0.032 | 0.016          | 0.000               |
|                          | 0.012               | 0.416        | -0.017 | 0.041 | 0.009          | -0.005              | -0.001   | 0.925        | -0.024 | 0.022 | 0.008          | -0.006              | -0.001   | 0.958        | -0.043 | 0.041 | 0.008          | -0.006              | 0.000  | 0.985        | -0.042 | 0.041 | 0.008          | -0.006              |
| TG (mg/dL)               | -0.024              | 0.570        | -0.105 | 0.058 | 0.010          | -0.006              | 0.037    | 0.281        | -0.030 | 0.105 | 0.011          | -0.005              | 0.001    | 0.983        | -0.113 | 0.115 | 0.009          | -0.007              | -0.005 | 0.932        | -0.119 | 0.109 | 0.009          | -0.007              |
|                          | -0.025              | 0.484        | -0.094 | 0.045 | 0.023          | 0.009               | -0.021   | 0.473        | -0.077 | 0.036 | 0.023          | 0.009               | -0.046   | 0.368        | -0.146 | 0.054 | 0.024          | 0.010               | -0.041 | 0.419        | -0.142 | 0.059 | 0.024          | 0.010               |

## ARTICLE

## Journal Name

|                          |                     |              |        |        |                |                     |                   |              |        |        |                |                     |                    |              |        |        |                |                     |        |              |        |        |       |        |
|--------------------------|---------------------|--------------|--------|--------|----------------|---------------------|-------------------|--------------|--------|--------|----------------|---------------------|--------------------|--------------|--------|--------|----------------|---------------------|--------|--------------|--------|--------|-------|--------|
| SBP (mmHg)               | -0.008              | 0.376        | -0.027 | 0.010  | 0.006          | -0.010              | -0.003            | 0.748        | -0.018 | 0.013  | 0.005          | -0.011              | -0.009             | 0.484        | -0.035 | 0.017  | 0.006          | -0.011              | -0.010 | 0.443        | -0.036 | 0.016  | 0.006 | -0.010 |
|                          | -0.009              | 0.401        | -0.030 | 0.012  | 0.034          | 0.020               | 0.003             | 0.703        | -0.014 | 0.021  | 0.033          | 0.020               | 0.024              | 0.134        | -0.007 | 0.054  | 0.036          | 0.022               | 0.022  | 0.162        | -0.009 | 0.053  | 0.035 | 0.022  |
| DBP (mmHg)               | -0.002              | 0.839        | -0.021 | 0.017  | 0.010          | -0.006              | -0.009            | 0.248        | -0.025 | 0.007  | 0.012          | -0.004              | -0.011             | 0.415        | -0.038 | 0.016  | 0.011          | -0.005              | -0.011 | 0.417        | -0.038 | 0.016  | 0.011 | -0.005 |
|                          | -0.009              | 0.396        | -0.029 | 0.011  | 0.049          | 0.035               | -0.006            | 0.452        | -0.023 | 0.010  | 0.049          | 0.035               | 0.001              | 0.956        | -0.028 | 0.030  | 0.048          | 0.035               | 0.000  | 0.990        | -0.029 | 0.029  | 0.048 | 0.035  |
| hs-CRP (mg/dL)           | -0.036              | 0.396        | -0.118 | 0.047  | 0.028          | 0.012               | -0.008            | 0.821        | -0.076 | 0.060  | 0.027          | 0.011               | 0.097              | 0.097        | -0.018 | 0.212  | 0.030          | 0.014               | 0.104  | 0.077        | -0.011 | 0.218  | 0.031 | 0.015  |
|                          | -0.027              | 0.441        | -0.095 | 0.041  | 0.026          | 0.012               | 0.028             | 0.329        | -0.028 | 0.083  | 0.026          | 0.012               | -0.042             | 0.409        | -0.141 | 0.057  | 0.026          | 0.012               | -0.040 | 0.429        | -0.139 | 0.059  | 0.026 | 0.012  |
| IL-6 (pg/mL)             | 0.024               | 0.673        | -0.087 | 0.135  | 0.010          | -0.006              | -0.123            | <b>0.009</b> | -0.215 | -0.031 | 0.019          | 0.003               | 0.126              | 0.112        | -0.029 | 0.282  | 0.013          | -0.003              | 0.114  | 0.152        | -0.042 | 0.269  | 0.012 | -0.004 |
|                          | -0.041              | 0.378        | -0.131 | 0.050  | 0.071          | 0.057               | -0.049            | 0.189        | -0.123 | 0.024  | 0.072          | 0.058               | -0.159             | <b>0.017</b> | -0.290 | -0.029 | 0.076          | 0.063               | -0.185 | <b>0.006</b> | -0.315 | -0.054 | 0.078 | 0.065  |
| IL-1 $\beta$ (pg/mL)     | -0.005              | 0.911        | -0.094 | 0.084  | 0.030          | 0.014               | -0.070            | 0.064        | -0.143 | 0.004  | 0.034          | 0.018               | 0.017              | 0.785        | -0.107 | 0.142  | 0.030          | 0.014               | 0.013  | 0.839        | -0.111 | 0.137  | 0.030 | 0.014  |
|                          | -0.092              | <b>0.026</b> | -0.173 | -0.011 | 0.104          | 0.091               | -0.029            | 0.389        | -0.095 | 0.037  | 0.099          | 0.086               | -0.110             | 0.067        | -0.227 | 0.008  | 0.102          | 0.089               | -0.135 | <b>0.024</b> | -0.252 | -0.017 | 0.104 | 0.091  |
| TNF- $\alpha$ (pg/mL)    | 0.027               | 0.606        | -0.076 | 0.131  | 0.036          | 0.020               | -0.105            | <b>0.017</b> | -0.191 | -0.019 | 0.043          | 0.027               | 0.015              | 0.837        | -0.130 | 0.161  | 0.035          | 0.020               | 0.018  | 0.808        | -0.127 | 0.163  | 0.035 | 0.020  |
|                          | -0.144              | <b>0.003</b> | -0.240 | -0.048 | 0.038          | 0.024               | -0.104            | <b>0.009</b> | -0.182 | -0.025 | 0.035          | 0.022               | -0.111             | 0.119        | -0.251 | 0.029  | 0.031          | 0.017               | -0.116 | 0.103        | -0.256 | 0.024  | 0.031 | 0.017  |
| IL-10 (pg/mL)            | 0.060               | 0.271        | -0.047 | 0.166  | 0.044          | 0.029               | 0.005             | 0.907        | -0.083 | 0.094  | 0.042          | 0.027               | 0.017              | 0.828        | -0.133 | 0.166  | 0.043          | 0.027               | 0.014  | 0.857        | -0.135 | 0.163  | 0.042 | 0.027  |
|                          | 0.088               | 0.120        | -0.023 | 0.198  | 0.047          | 0.034               | 0.061             | 0.186        | -0.029 | 0.150  | 0.046          | 0.033               | 0.106              | 0.194        | -0.054 | 0.266  | 0.046          | 0.033               | 0.114  | 0.165        | -0.047 | 0.274  | 0.047 | 0.033  |
| IL-4 (pg/mL)             | -0.088              | 0.306        | -0.257 | 0.081  | 0.036          | 0.020               | -0.074            | 0.303        | -0.214 | 0.067  | 0.036          | 0.020               | -0.110             | 0.361        | -0.347 | 0.127  | 0.036          | 0.020               | -0.108 | 0.369        | -0.345 | 0.128  | 0.036 | 0.020  |
|                          | 0.049               | 0.487        | -0.090 | 0.188  | 0.033          | 0.019               | 0.120             | <b>0.037</b> | 0.007  | 0.233  | 0.037          | 0.024               | 0.054              | 0.600        | -0.148 | 0.256  | 0.033          | 0.019               | 0.045  | 0.664        | -0.157 | 0.246  | 0.033 | 0.019  |
| TAC ( $\mu$ M)           | 0.114               | 0.079        | -0.013 | 0.242  | 0.025          | 0.009               | 0.073             | 0.177        | -0.033 | 0.179  | 0.023          | 0.007               | 0.011              | 0.904        | -0.169 | 0.191  | 0.021          | 0.005               | 0.010  | 0.912        | -0.169 | 0.189  | 0.021 | 0.005  |
|                          | 0.181               | <b>0.006</b> | 0.051  | 0.311  | 0.033          | 0.019               | -0.047            | 0.382        | -0.153 | 0.059  | 0.025          | 0.011               | 0.106              | 0.273        | -0.083 | 0.294  | 0.026          | 0.012               | 0.122  | 0.203        | -0.066 | 0.311  | 0.026 | 0.012  |
| MDA ( $\mu$ M)           | 0.007               | 0.876        | -0.084 | 0.098  | 0.033          | 0.017               | 0.063             | 0.104        | -0.013 | 0.138  | 0.036          | 0.021               | 0.067              | 0.301        | -0.060 | 0.195  | 0.034          | 0.019               | 0.067  | 0.302        | -0.060 | 0.194  | 0.034 | 0.019  |
|                          | -0.055              | 0.252        | -0.150 | 0.039  | 0.036          | 0.022               | -0.007            | 0.857        | -0.084 | 0.070  | 0.034          | 0.020               | -0.015             | 0.835        | -0.152 | 0.123  | 0.034          | 0.020               | -0.008 | 0.910        | -0.145 | 0.129  | 0.034 | 0.020  |
|                          | <b>Violaxanthin</b> |              |        |        |                |                     | <b>Neoxanthin</b> |              |        |        |                |                     | <b>Astaxanthin</b> |              |        |        |                |                     |        |              |        |        |       |        |
|                          |                     |              | 95% CI |        |                |                     |                   |              | 95% CI |        |                |                     |                    |              | 95% CI |        |                |                     |        |              |        |        |       |        |
|                          | $\beta$             | p-value      | Lower  | Upper  | R <sup>2</sup> | R <sup>2</sup> adj. | $\beta$           | p-value      | Lower  | Upper  | R <sup>2</sup> | R <sup>2</sup> adj. | $\beta$            | p-value      | Lower  | Upper  | R <sup>2</sup> | R <sup>2</sup> adj. |        |              |        |        |       |        |
| BMI (kg/m <sup>2</sup> ) | 0.004               | 0.469        | -0.006 | 0.013  | 0.073          | 0.059               | 0.005             | 0.301        | -0.005 | 0.015  | 0.073          | 0.059               | 0.000              | 0.923        | -0.002 | 0.002  | 0.072          | 0.058               |        |              |        |        |       |        |
|                          | 0.019               | <b>0.017</b> | 0.003  | 0.034  | 0.066          | 0.053               | 0.021             | <b>0.006</b> | 0.006  | 0.036  | 0.068          | 0.056               | 0.005              | <b>0.001</b> | 0.002  | 0.008  | 0.072          | 0.059               |        |              |        |        |       |        |
| WC (cm)                  | 0.002               | 0.904        | -0.030 | 0.034  | 0.017          | 0.001               | -0.001            | 0.941        | -0.034 | 0.031  | 0.017          | 0.001               | -0.001             | 0.800        | -0.007 | 0.005  | 0.017          | 0.001               |        |              |        |        |       |        |
|                          | 0.012               | 0.352        | -0.013 | 0.038  | 0.304          | 0.294               | 0.010             | 0.452        | -0.015 | 0.035  | 0.304          | 0.294               | 0.002              | 0.313        | -0.002 | 0.007  | 0.304          | 0.294               |        |              |        |        |       |        |
| FBG (mg/dL)              | 0.000               | 0.976        | -0.030 | 0.031  | 0.009          | -0.007              | -0.003            | 0.837        | -0.033 | 0.027  | 0.009          | -0.007              | 0.000              | 0.942        | -0.006 | 0.005  | 0.009          | -0.007              |        |              |        |        |       |        |
|                          | -0.015              | 0.400        | -0.048 | 0.019  | 0.026          | 0.012               | -0.020            | 0.228        | -0.054 | 0.013  | 0.027          | 0.013               | 0.001              | 0.778        | -0.006 | 0.007  | 0.025          | 0.011               |        |              |        |        |       |        |

## Food and Function

## Supplementary Tables

|                       |        |              |        |        |       |        |        |              |        |       |       |        |        |       |        |       |       |        |
|-----------------------|--------|--------------|--------|--------|-------|--------|--------|--------------|--------|-------|-------|--------|--------|-------|--------|-------|-------|--------|
| Insulin (mIU/mL)      | 0.046  | 0.426        | -0.067 | 0.159  | 0.018 | 0.002  | 0.027  | 0.642        | -0.086 | 0.140 | 0.017 | 0.001  | -0.006 | 0.598 | -0.027 | 0.016 | 0.017 | 0.001  |
|                       | 0.050  | 0.401        | -0.067 | 0.168  | 0.015 | 0.001  | 0.041  | 0.488        | -0.074 | 0.155 | 0.015 | 0.000  | 0.021  | 0.071 | -0.002 | 0.043 | 0.018 | 0.004  |
| HOMA IR (%)           | 0.046  | 0.471        | -0.080 | 0.173  | 0.015 | -0.001 | 0.024  | 0.713        | -0.102 | 0.150 | 0.015 | -0.001 | -0.006 | 0.624 | -0.030 | 0.018 | 0.015 | -0.001 |
|                       | 0.036  | 0.597        | -0.097 | 0.168  | 0.010 | -0.004 | 0.020  | 0.760        | -0.110 | 0.150 | 0.009 | -0.005 | 0.021  | 0.095 | -0.004 | 0.047 | 0.013 | -0.001 |
| HDL-c (mg/dL)         | 0.011  | 0.673        | -0.040 | 0.062  | 0.019 | 0.003  | 0.009  | 0.738        | -0.042 | 0.059 | 0.019 | 0.003  | 0.000  | 0.919 | -0.010 | 0.009 | 0.019 | 0.003  |
|                       | 0.003  | 0.893        | -0.047 | 0.054  | 0.020 | 0.006  | -0.007 | 0.784        | -0.057 | 0.043 | 0.020 | 0.006  | 0.000  | 0.997 | -0.010 | 0.010 | 0.020 | 0.006  |
| LDL-c (mg/dL)         | 0.014  | 0.643        | -0.044 | 0.071  | 0.016 | 0.000  | 0.010  | 0.727        | -0.047 | 0.067 | 0.016 | 0.000  | 0.004  | 0.447 | -0.007 | 0.015 | 0.016 | 0.000  |
|                       | 0.027  | 0.325        | -0.027 | 0.081  | 0.030 | 0.016  | 0.017  | 0.531        | -0.036 | 0.069 | 0.029 | 0.015  | 0.002  | 0.650 | -0.008 | 0.013 | 0.029 | 0.015  |
| TC (mg/dL)            | -0.011 | 0.589        | -0.050 | 0.029  | 0.016 | 0.000  | -0.009 | 0.640        | -0.049 | 0.030 | 0.016 | 0.000  | 0.000  | 0.898 | -0.008 | 0.007 | 0.015 | 0.000  |
|                       | 0.011  | 0.563        | -0.026 | 0.048  | 0.009 | -0.005 | -0.003 | 0.885        | -0.039 | 0.034 | 0.009 | -0.006 | 0.000  | 0.895 | -0.007 | 0.008 | 0.009 | -0.006 |
| TG (mg/dL)            | -0.041 | 0.452        | -0.148 | 0.066  | 0.010 | -0.006 | -0.030 | 0.579        | -0.137 | 0.077 | 0.010 | -0.006 | -0.001 | 0.952 | -0.021 | 0.020 | 0.009 | -0.007 |
|                       | -0.031 | 0.501        | -0.120 | 0.058  | 0.023 | 0.009  | -0.042 | 0.342        | -0.129 | 0.045 | 0.024 | 0.010  | -0.003 | 0.695 | -0.020 | 0.014 | 0.023 | 0.009  |
| SBP (mmHg)            | -0.010 | 0.411        | -0.034 | 0.014  | 0.006 | -0.010 | -0.008 | 0.522        | -0.032 | 0.016 | 0.005 | -0.011 | 0.000  | 0.965 | -0.004 | 0.005 | 0.005 | -0.011 |
|                       | -0.023 | 0.095        | -0.051 | 0.004  | 0.036 | 0.023  | -0.026 | 0.058        | -0.053 | 0.001 | 0.037 | 0.024  | 0.001  | 0.786 | -0.004 | 0.006 | 0.033 | 0.019  |
| DBP (mmHg)            | -0.008 | 0.529        | -0.033 | 0.017  | 0.011 | -0.005 | -0.003 | 0.824        | -0.028 | 0.022 | 0.010 | -0.006 | -0.001 | 0.649 | -0.006 | 0.004 | 0.011 | -0.005 |
|                       | -0.018 | 0.166        | -0.044 | 0.008  | 0.050 | 0.037  | -0.006 | 0.618        | -0.032 | 0.019 | 0.049 | 0.035  | -0.001 | 0.598 | -0.006 | 0.004 | 0.049 | 0.035  |
| hs-CRP (mg/dL)        | 0.013  | 0.814        | -0.095 | 0.121  | 0.027 | 0.011  | 0.015  | 0.780        | -0.093 | 0.123 | 0.027 | 0.011  | 0.003  | 0.806 | -0.018 | 0.023 | 0.027 | 0.011  |
|                       | -0.030 | 0.507        | -0.118 | 0.058  | 0.025 | 0.011  | -0.011 | 0.807        | -0.097 | 0.075 | 0.025 | 0.011  | -0.003 | 0.696 | -0.020 | 0.013 | 0.025 | 0.011  |
| IL-6 (pg/mL)          | 0.019  | 0.799        | -0.127 | 0.165  | 0.009 | -0.007 | 0.003  | 0.968        | -0.143 | 0.149 | 0.009 | -0.007 | 0.022  | 0.114 | -0.005 | 0.050 | 0.013 | -0.003 |
|                       | -0.089 | 0.135        | -0.205 | 0.028  | 0.072 | 0.059  | -0.074 | 0.204        | -0.187 | 0.040 | 0.071 | 0.058  | -0.021 | 0.062 | -0.043 | 0.001 | 0.074 | 0.060  |
| IL-1 $\beta$ (pg/mL)  | -0.030 | 0.608        | -0.147 | 0.086  | 0.030 | 0.014  | -0.067 | 0.261        | -0.183 | 0.050 | 0.031 | 0.016  | -0.008 | 0.461 | -0.030 | 0.014 | 0.030 | 0.015  |
|                       | -0.130 | <b>0.014</b> | -0.234 | -0.026 | 0.105 | 0.092  | -0.073 | 0.158        | -0.175 | 0.029 | 0.101 | 0.088  | -0.009 | 0.374 | -0.029 | 0.011 | 0.099 | 0.087  |
| TNF- $\alpha$ (pg/mL) | 0.013  | 0.852        | -0.124 | 0.150  | 0.035 | 0.020  | -0.025 | 0.715        | -0.162 | 0.111 | 0.035 | 0.020  | 0.002  | 0.850 | -0.023 | 0.028 | 0.035 | 0.020  |
|                       | -0.020 | 0.758        | -0.144 | 0.105  | 0.028 | 0.014  | 0.028  | 0.649        | -0.093 | 0.150 | 0.028 | 0.014  | 0.011  | 0.342 | -0.012 | 0.035 | 0.029 | 0.015  |
| IL-10 (pg/mL)         | 0.100  | 0.163        | -0.040 | 0.240  | 0.045 | 0.029  | 0.147  | <b>0.039</b> | 0.008  | 0.287 | 0.048 | 0.033  | -0.005 | 0.715 | -0.031 | 0.022 | 0.043 | 0.027  |
|                       | 0.123  | 0.089        | -0.019 | 0.265  | 0.048 | 0.034  | 0.121  | 0.089        | -0.018 | 0.260 | 0.048 | 0.034  | -0.008 | 0.547 | -0.035 | 0.019 | 0.045 | 0.031  |
| IL-4 (pg/mL)          | -0.068 | 0.547        | -0.291 | 0.154  | 0.035 | 0.019  | -0.066 | 0.562        | -0.288 | 0.157 | 0.035 | 0.019  | -0.014 | 0.511 | -0.056 | 0.028 | 0.035 | 0.019  |
|                       | -0.015 | 0.872        | -0.194 | 0.164  | 0.032 | 0.019  | -0.020 | 0.819        | -0.196 | 0.155 | 0.032 | 0.019  | -0.011 | 0.535 | -0.045 | 0.023 | 0.033 | 0.019  |

## ARTICLE

## Journal Name

|                                |                  |              |        |       |       |            |         |                   |        |       |       |            |        |       |        |       |       |       |
|--------------------------------|------------------|--------------|--------|-------|-------|------------|---------|-------------------|--------|-------|-------|------------|--------|-------|--------|-------|-------|-------|
| TAC ( $\mu\text{M}$ )          | 0.088            | 0.305        | -0.080 | 0.257 | 0.022 | 0.006      | 0.117   | 0.173             | -0.051 | 0.285 | 0.023 | 0.007      | 0.011  | 0.506 | -0.021 | 0.043 | 0.021 | 0.005 |
|                                | 0.347            | <b>0.000</b> | 0.181  | 0.513 | 0.044 | 0.030      | 0.400   | <b>0.000</b>      | 0.238  | 0.562 | 0.051 | 0.038      | -0.001 | 0.933 | -0.033 | 0.031 | 0.024 | 0.010 |
| MDA ( $\mu\text{M}$ )          | 0.037            | 0.550        | -0.083 | 0.156 | 0.034 | 0.018      | 0.032   | 0.598             | -0.088 | 0.152 | 0.033 | 0.018      | 0.003  | 0.812 | -0.020 | 0.025 | 0.033 | 0.017 |
|                                | -0.043           | 0.485        | -0.165 | 0.078 | 0.035 | 0.021      | -0.015  | 0.808             | -0.134 | 0.104 | 0.034 | 0.020      | 0.003  | 0.820 | -0.020 | 0.026 | 0.034 | 0.020 |
|                                | Non-provitamin A |              |        |       |       |            |         | Total carotenoids |        |       |       |            |        |       |        |       |       |       |
|                                |                  |              | 95% CI |       |       |            |         |                   | 95% CI |       |       |            |        |       |        |       |       |       |
|                                | $\beta$          | p-value      | Lower  | Upper | $R^2$ | $R^2$ adj. | $\beta$ | p-value           | Lower  | Upper | $R^2$ | $R^2$ adj. |        |       |        |       |       |       |
| BMI ( $\text{kg}/\text{m}^2$ ) | 0.009            | 0.130        | -0.003 | 0.021 | 0.075 | 0.061      | 0.007   | 0.169             | -0.003 | 0.016 | 0.074 | 0.060      |        |       |        |       |       |       |
|                                | 0.021            | <b>0.031</b> | 0.002  | 0.040 | 0.064 | 0.052      | 0.011   | 0.152             | -0.004 | 0.027 | 0.062 | 0.049      |        |       |        |       |       |       |
| WC (cm)                        | 0.031            | 0.133        | -0.009 | 0.070 | 0.020 | 0.004      | 0.000   | 0.999             | -0.032 | 0.032 | 0.017 | 0.001      |        |       |        |       |       |       |
|                                | 0.024            | 0.131        | -0.007 | 0.056 | 0.305 | 0.295      | 0.003   | 0.807             | -0.023 | 0.029 | 0.303 | 0.293      |        |       |        |       |       |       |
| FBG (mg/dL)                    | 0.014            | 0.459        | -0.023 | 0.051 | 0.009 | -0.007     | 0.019   | 0.218             | -0.011 | 0.049 | 0.011 | -0.005     |        |       |        |       |       |       |
|                                | 0.024            | 0.266        | -0.018 | 0.066 | 0.026 | 0.012      | 0.021   | 0.227             | -0.013 | 0.056 | 0.027 | 0.013      |        |       |        |       |       |       |
| Insulin (mIU/mL)               | 0.061            | 0.390        | -0.078 | 0.200 | 0.018 | 0.002      | 0.069   | 0.228             | -0.043 | 0.180 | 0.019 | 0.003      |        |       |        |       |       |       |
|                                | 0.070            | 0.346        | -0.076 | 0.216 | 0.015 | 0.001      | -0.016  | 0.786             | -0.136 | 0.103 | 0.014 | 0.000      |        |       |        |       |       |       |
| HOMA IR (%)                    | 0.075            | 0.343        | -0.080 | 0.230 | 0.016 | 0.000      | 0.087   | 0.169             | -0.037 | 0.212 | 0.017 | 0.001      |        |       |        |       |       |       |
|                                | 0.094            | 0.263        | -0.071 | 0.259 | 0.011 | -0.003     | 0.005   | 0.945             | -0.130 | 0.139 | 0.009 | -0.005     |        |       |        |       |       |       |
| HDL-c (mg/dL)                  | 0.031            | 0.323        | -0.031 | 0.094 | 0.020 | 0.005      | -0.015  | 0.552             | -0.065 | 0.035 | 0.020 | 0.004      |        |       |        |       |       |       |
|                                | 0.072            | <b>0.024</b> | 0.010  | 0.135 | 0.026 | 0.012      | 0.039   | 0.139             | -0.013 | 0.090 | 0.023 | 0.009      |        |       |        |       |       |       |
| LDL-c (mg/dL)                  | -0.028           | 0.435        | -0.098 | 0.042 | 0.016 | 0.001      | -0.026  | 0.376             | -0.082 | 0.031 | 0.017 | 0.001      |        |       |        |       |       |       |
|                                | 0.028            | 0.408        | -0.039 | 0.095 | 0.029 | 0.015      | 0.019   | 0.483             | -0.035 | 0.074 | 0.029 | 0.015      |        |       |        |       |       |       |
| TC (mg/dL)                     | -0.009           | 0.715        | -0.058 | 0.040 | 0.016 | 0.000      | -0.005  | 0.792             | -0.044 | 0.034 | 0.016 | 0.000      |        |       |        |       |       |       |
|                                | 0.003            | 0.884        | -0.043 | 0.049 | 0.009 | -0.006     | 0.000   | 0.980             | -0.037 | 0.038 | 0.008 | -0.006     |        |       |        |       |       |       |
| TG (mg/dL)                     | 0.025            | 0.709        | -0.107 | 0.157 | 0.010 | -0.006     | 0.002   | 0.969             | -0.104 | 0.108 | 0.009 | -0.007     |        |       |        |       |       |       |
|                                | -0.056           | 0.318        | -0.167 | 0.054 | 0.024 | 0.010      | -0.006  | 0.893             | -0.097 | 0.084 | 0.023 | 0.009      |        |       |        |       |       |       |
| SBP (mmHg)                     | -0.012           | 0.426        | -0.042 | 0.018 | 0.006 | -0.010     | -0.020  | 0.100             | -0.044 | 0.004 | 0.009 | -0.008     |        |       |        |       |       |       |
|                                | 0.011            | 0.535        | -0.023 | 0.045 | 0.034 | 0.020      | 0.008   | 0.566             | -0.020 | 0.036 | 0.034 | 0.020      |        |       |        |       |       |       |
| DBP (mmHg)                     | -0.017           | 0.290        | -0.048 | 0.014 | 0.012 | -0.004     | -0.016  | 0.206             | -0.041 | 0.009 | 0.012 | -0.004     |        |       |        |       |       |       |
|                                | -0.013           | 0.439        | -0.045 | 0.020 | 0.049 | 0.035      | -0.003  | 0.801             | -0.030 | 0.023 | 0.048 | 0.035      |        |       |        |       |       |       |

|                          |        |              |        |        |       |        |        |              |        |        |       |        |
|--------------------------|--------|--------------|--------|--------|-------|--------|--------|--------------|--------|--------|-------|--------|
| hs-CRP<br>(mg/dL)        | 0.029  | 0.666        | -0.104 | 0.162  | 0.027 | 0.011  | 0.061  | 0.264        | -0.046 | 0.168  | 0.028 | 0.012  |
|                          | -0.006 | 0.907        | -0.116 | 0.103  | 0.025 | 0.011  | 0.035  | 0.440        | -0.054 | 0.124  | 0.026 | 0.012  |
| IL-6 (pg/mL)             | 0.011  | 0.907        | -0.169 | 0.191  | 0.009 | -0.007 | 0.004  | 0.957        | -0.141 | 0.149  | 0.009 | -0.007 |
|                          | -0.148 | <b>0.044</b> | -0.292 | -0.004 | 0.074 | 0.061  | -0.176 | <b>0.003</b> | -0.293 | -0.058 | 0.079 | 0.066  |
| IL-1 $\beta$<br>(pg/mL)  | -0.047 | 0.518        | -0.191 | 0.096  | 0.030 | 0.014  | -0.120 | <b>0.041</b> | -0.235 | -0.005 | 0.035 | 0.019  |
|                          | -0.140 | <b>0.034</b> | -0.269 | -0.010 | 0.103 | 0.091  | -0.121 | <b>0.025</b> | -0.227 | -0.015 | 0.104 | 0.091  |
| TNF- $\alpha$<br>(pg/mL) | -0.067 | 0.436        | -0.234 | 0.101  | 0.036 | 0.020  | -0.063 | 0.358        | -0.198 | 0.072  | 0.036 | 0.021  |
|                          | -0.194 | <b>0.013</b> | -0.348 | -0.040 | 0.035 | 0.021  | -0.169 | <b>0.008</b> | -0.295 | -0.044 | 0.036 | 0.022  |
| IL-10<br>(pg/mL)         | 0.032  | 0.717        | -0.140 | 0.204  | 0.043 | 0.027  | 0.081  | 0.248        | -0.057 | 0.220  | 0.044 | 0.029  |
|                          | 0.158  | 0.080        | -0.019 | 0.334  | 0.048 | 0.034  | 0.199  | <b>0.007</b> | 0.055  | 0.342  | 0.053 | 0.039  |
| IL-4 (pg/mL)             | -0.155 | 0.267        | -0.428 | 0.119  | 0.036 | 0.020  | 0.010  | 0.928        | -0.210 | 0.230  | 0.034 | 0.019  |
|                          | 0.156  | 0.170        | -0.067 | 0.378  | 0.035 | 0.021  | 0.053  | 0.564        | -0.128 | 0.235  | 0.033 | 0.019  |
| TAC ( $\mu$ M)           | 0.099  | 0.348        | -0.108 | 0.306  | 0.022 | 0.006  | 0.122  | 0.150        | -0.044 | 0.288  | 0.023 | 0.008  |
|                          | 0.131  | 0.218        | -0.077 | 0.339  | 0.026 | 0.012  | 0.163  | 0.060        | -0.007 | 0.333  | 0.029 | 0.015  |
| MDA ( $\mu$ M)           | 0.109  | 0.146        | -0.038 | 0.256  | 0.036 | 0.020  | 0.086  | 0.154        | -0.032 | 0.204  | 0.036 | 0.020  |
|                          | -0.032 | 0.681        | -0.183 | 0.120  | 0.034 | 0.020  | -0.034 | 0.594        | -0.157 | 0.090  | 0.034 | 0.021  |

\*The First rows for each biomarker show the normal-weight (control) values, and the second rows show the values for overweight/obese (case) participants.

Multiple linear regression models were used to assess the associations between carotenoids and a selected list of biomarkers relevant to cardiometabolic health and inflammatory status. The associations were assessed separately in overweight/obese and normal-weight participants. Groups of overweight/obese and normal weight are determined based on BMI, where normal-weight status is defined as BMI < 25 kg/m<sup>2</sup> and overweight/obesity is defined as BMI  $\geq$  25 kg/m<sup>2</sup>. The model was adjusted for the following variables: age (y), sex (male/ female), marital status (married/ single/ other), education level (having diploma or low literacy/ higher than diploma), smoking status (yes/no), disease history (yes/no for cardiovascular disease, diabetes, and hypertension) and fruit + vegetable intake. BMI (kg/m<sup>2</sup>) was also included as an explanatory variable, in models where it was not the dependent variable. All continuous variables were log-transformed. Carotenoids were adjusted for total energy intake ( $\mu$ g/1000 kcal) prior to log-transformation.

Statistically significant p-values (p < 0.05) are shown in **bold**.

Abbreviations: BMI = body mass index, HDL-c = high-density lipoprotein cholesterol, LDL-c = low-density lipoprotein cholesterol, SBP = systolic blood pressure, DBP = diastolic blood pressure, hs-CRP = high-sensitivity C-reactive protein, IL = interleukin, TNF- $\alpha$  = tumor necrosis factor  $\alpha$ , TAC = total antioxidant capacity, MDA = malondialdehyde.

**Supplementary Table 13:** Association between dietary carotenoid intake and biomarkers in men and women groups\*.

|                               | <b>α-Carotene</b> |              |        |        |                |                     | <b>β-Carotene</b> |         |        |       |                |                     | <b>β-Cryptoxanthin</b> |              |        |        |                |                     | <b>Provitamin A</b> |              |        |        |                |                     |  |  |
|-------------------------------|-------------------|--------------|--------|--------|----------------|---------------------|-------------------|---------|--------|-------|----------------|---------------------|------------------------|--------------|--------|--------|----------------|---------------------|---------------------|--------------|--------|--------|----------------|---------------------|--|--|
|                               |                   |              | 95% CI |        | R <sup>2</sup> | R <sup>2</sup> adj. |                   |         | 95% CI |       | R <sup>2</sup> | R <sup>2</sup> adj. |                        |              | 95% CI |        | R <sup>2</sup> | R <sup>2</sup> adj. |                     |              | 95% CI |        | R <sup>2</sup> | R <sup>2</sup> adj. |  |  |
|                               | β                 | p-value      | Lower  | Upper  |                |                     | β                 | p-value | Lower  | Upper |                |                     | β                      | p-value      | Lower  | Upper  |                |                     | β                   | p-value      | Lower  | Upper  |                |                     |  |  |
| <b>BMI (kg/m<sup>2</sup>)</b> | -0.003            | 0.597        | -0.015 | 0.009  | 0.018          | 0.005               | -0.006            | 0.451   | -0.023 | 0.010 | 0.018          | 0.006               | -0.007                 | 0.483        | -0.028 | 0.013  | 0.018          | 0.005               | -0.007              | 0.391        | -0.023 | 0.009  | 0.018          | 0.006               |  |  |
|                               | -0.007            | 0.283        | -0.019 | 0.006  | 0.039          | 0.027               | -0.004            | 0.695   | -0.022 | 0.015 | 0.038          | 0.026               | 0.017                  | 0.141        | -0.006 | 0.039  | 0.040          | 0.028               | -0.007              | 0.392        | -0.025 | 0.010  | 0.039          | 0.027               |  |  |
| <b>WC (cm)</b>                | -0.003            | 0.631        | -0.017 | 0.010  | 0.386          | 0.378               | -0.011            | 0.250   | -0.031 | 0.008 | 0.387          | 0.378               | 0.007                  | 0.571        | -0.017 | 0.031  | 0.386          | 0.378               | -0.009              | 0.351        | -0.027 | 0.010  | 0.387          | 0.378               |  |  |
|                               | -0.011            | 0.112        | -0.024 | 0.003  | 0.071          | 0.058               | -0.010            | 0.326   | -0.029 | 0.010 | 0.069          | 0.057               | -0.012                 | 0.317        | -0.036 | 0.012  | 0.069          | 0.057               | -0.013              | 0.179        | -0.031 | 0.006  | 0.070          | 0.058               |  |  |
| <b>FBG (mg/dL)</b>            | 0.008             | 0.319        | -0.008 | 0.024  | 0.013          | -0.001              | 0.010             | 0.381   | -0.012 | 0.032 | 0.013          | -0.001              | 0.015                  | 0.296        | -0.013 | 0.042  | 0.013          | -0.001              | 0.010               | 0.367        | -0.011 | 0.031  | 0.013          | -0.001              |  |  |
|                               | 0.005             | 0.521        | -0.010 | 0.019  | 0.013          | 0.000               | 0.002             | 0.883   | -0.019 | 0.022 | 0.013          | -0.001              | -0.004                 | 0.746        | -0.030 | 0.021  | 0.013          | -0.001              | 0.004               | 0.723        | -0.016 | 0.023  | 0.013          | -0.001              |  |  |
| <b>Insulin (mIU/mL)</b>       | -0.027            | 0.317        | -0.081 | 0.026  | 0.016          | 0.002               | -0.038            | 0.337   | -0.114 | 0.039 | 0.016          | 0.002               | 0.024                  | 0.615        | -0.071 | 0.120  | 0.015          | 0.001               | -0.036              | 0.329        | -0.108 | 0.036  | 0.016          | 0.002               |  |  |
|                               | 0.021             | 0.437        | -0.031 | 0.073  | 0.015          | 0.001               | 0.018             | 0.636   | -0.058 | 0.094 | 0.014          | 0.001               | 0.018                  | 0.697        | -0.075 | 0.112  | 0.014          | 0.001               | 0.027               | 0.459        | -0.044 | 0.098  | 0.015          | 0.001               |  |  |
| <b>HOMA IR (%)</b>            | -0.020            | 0.529        | -0.080 | 0.041  | 0.009          | -0.005              | -0.028            | 0.532   | -0.114 | 0.059 | 0.009          | -0.005              | 0.039                  | 0.475        | -0.068 | 0.147  | 0.009          | -0.004              | -0.026              | 0.527        | -0.108 | 0.055  | 0.009          | -0.005              |  |  |
|                               | 0.025             | 0.395        | -0.033 | 0.084  | 0.015          | 0.001               | 0.020             | 0.647   | -0.065 | 0.105 | 0.014          | 0.000               | 0.014                  | 0.789        | -0.090 | 0.119  | 0.014          | 0.000               | 0.030               | 0.455        | -0.050 | 0.111  | 0.015          | 0.001               |  |  |
| <b>HDL-c (mg/dL)</b>          | 0.006             | 0.636        | -0.018 | 0.029  | 0.018          | 0.005               | 0.000             | 0.990   | -0.033 | 0.033 | 0.018          | 0.004               | 0.017                  | 0.424        | -0.024 | 0.058  | 0.019          | 0.005               | 0.003               | 0.841        | -0.028 | 0.034  | 0.018          | 0.004               |  |  |
|                               | -0.008            | 0.532        | -0.031 | 0.016  | 0.035          | 0.022               | -0.012            | 0.491   | -0.047 | 0.022 | 0.035          | 0.022               | 0.008                  | 0.701        | -0.034 | 0.051  | 0.035          | 0.021               | -0.011              | 0.519        | -0.043 | 0.022  | 0.035          | 0.022               |  |  |
| <b>LDL-c (mg/dL)</b>          | 0.002             | 0.859        | -0.022 | 0.026  | 0.014          | 0.000               | 0.009             | 0.606   | -0.025 | 0.043 | 0.014          | 0.001               | -0.016                 | 0.452        | -0.059 | 0.026  | 0.015          | 0.001               | 0.006               | 0.699        | -0.026 | 0.039  | 0.014          | 0.001               |  |  |
|                               | -0.018            | 0.178        | -0.045 | 0.008  | 0.015          | 0.002               | -0.016            | 0.424   | -0.055 | 0.023 | 0.014          | 0.000               | 0.018                  | 0.460        | -0.030 | 0.066  | 0.014          | 0.000               | -0.018              | 0.323        | -0.055 | 0.018  | 0.014          | 0.000               |  |  |
| <b>TC (mg/dL)</b>             | 0.001             | 0.912        | -0.016 | 0.018  | 0.013          | -0.001              | 0.008             | 0.506   | -0.016 | 0.033 | 0.013          | 0.000               | 0.000                  | 0.991        | -0.031 | 0.031  | 0.013          | -0.001              | 0.006               | 0.596        | -0.017 | 0.030  | 0.013          | -0.001              |  |  |
|                               | -0.011            | 0.215        | -0.029 | 0.006  | 0.010          | -0.004              | -0.008            | 0.524   | -0.034 | 0.017 | 0.009          | -0.005              | -0.001                 | 0.951        | -0.033 | 0.031  | 0.008          | -0.006              | -0.010              | 0.403        | -0.034 | 0.014  | 0.009          | -0.005              |  |  |
| <b>TG (mg/dL)</b>             | -0.016            | 0.477        | -0.059 | 0.028  | 0.019          | 0.005               | 0.018             | 0.575   | -0.044 | 0.079 | 0.018          | 0.005               | -0.015                 | 0.694        | -0.092 | 0.061  | 0.018          | 0.004               | 0.006               | 0.851        | -0.052 | 0.063  | 0.018          | 0.004               |  |  |
|                               | -0.005            | 0.827        | -0.052 | 0.042  | 0.012          | -0.001              | -0.025            | 0.480   | -0.093 | 0.044 | 0.013          | -0.001              | -0.038                 | 0.375        | -0.121 | 0.046  | 0.013          | 0.000               | -0.020              | 0.535        | -0.084 | 0.044  | 0.013          | -0.001              |  |  |
| <b>SBP (mmHg)</b>             | -0.002            | 0.807        | -0.014 | 0.011  | 0.005          | -0.009              | -0.002            | 0.808   | -0.020 | 0.016 | 0.005          | -0.009              | -0.024                 | <b>0.038</b> | -0.046 | -0.001 | 0.010          | -0.004              | -0.003              | 0.769        | -0.020 | 0.014  | 0.005          | -0.009              |  |  |
|                               | -0.005            | 0.429        | -0.016 | 0.007  | 0.021          | 0.008               | -0.006            | 0.460   | -0.023 | 0.010 | 0.021          | 0.008               | -0.006                 | 0.555        | -0.026 | 0.014  | 0.021          | 0.008               | -0.006              | 0.412        | -0.022 | 0.009  | 0.021          | 0.008               |  |  |
| <b>DBP (mmHg)</b>             | 0.005             | 0.430        | -0.007 | 0.017  | 0.011          | -0.003              | 0.003             | 0.759   | -0.014 | 0.020 | 0.010          | -0.004              | -0.029                 | <b>0.008</b> | -0.050 | -0.007 | 0.019          | 0.005               | 0.003               | 0.671        | -0.013 | 0.020  | 0.010          | -0.004              |  |  |
|                               | -0.011            | 0.072        | -0.022 | 0.001  | 0.027          | 0.014               | -0.014            | 0.114   | -0.030 | 0.003 | 0.026          | 0.013               | -0.008                 | 0.473        | -0.028 | 0.013  | 0.024          | 0.010               | -0.014              | 0.084        | -0.030 | 0.002  | 0.027          | 0.013               |  |  |
| <b>hs-CRP (mg/dL)</b>         | 0.035             | 0.131        | -0.010 | 0.079  | 0.041          | 0.028               | 0.052             | 0.111   | -0.012 | 0.116 | 0.042          | 0.028               | 0.037                  | 0.366        | -0.043 | 0.116  | 0.040          | 0.026               | 0.051               | 0.094        | -0.009 | 0.111  | 0.042          | 0.029               |  |  |
|                               | 0.022             | 0.320        | -0.022 | 0.067  | 0.034          | 0.020               | 0.026             | 0.429   | -0.039 | 0.091 | 0.033          | 0.020               | -0.014                 | 0.731        | -0.093 | 0.065  | 0.033          | 0.019               | 0.026               | 0.402        | -0.035 | 0.087  | 0.033          | 0.020               |  |  |
| <b>IL-6 (pg/mL)</b>           | -0.078            | <b>0.011</b> | -0.137 | -0.018 | 0.048          | 0.035               | -0.080            | 0.065   | -0.165 | 0.005 | 0.044          | 0.031               | -0.062                 | 0.248        | -0.168 | 0.043  | 0.042          | 0.028               | -0.086              | <b>0.034</b> | -0.166 | -0.007 | 0.045          | 0.032               |  |  |



## Food and Function

## Supplementary Tables

|                          |                            |              |        |        |                 |                     |         |              |                 |        |                |                     |                    |              |                |        |                |                     |         |              |                |        |                |                     |
|--------------------------|----------------------------|--------------|--------|--------|-----------------|---------------------|---------|--------------|-----------------|--------|----------------|---------------------|--------------------|--------------|----------------|--------|----------------|---------------------|---------|--------------|----------------|--------|----------------|---------------------|
| IL-1 $\beta$<br>(pg/mL)  | -0.041                     | 0.183        | -0.101 | 0.019  | 0.027           | 0.013               | -0.035  | 0.434        | -0.123          | 0.053  | 0.025          | 0.012               | -0.074             | 0.180        | -0.182         | 0.034  | 0.027          | 0.013               | -0.043  | 0.313        | -0.126         | 0.040  | 0.026          | 0.012               |
|                          | -0.072                     | <b>0.007</b> | -0.123 | -0.020 | 0.032           | 0.018               | -0.111  | <b>0.003</b> | -0.185          | -0.037 | 0.034          | 0.020               | -0.070             | 0.135        | -0.162         | 0.022  | 0.026          | 0.012               | -0.102  | <b>0.004</b> | -0.171         | -0.033 | 0.033          | 0.020               |
| TNF- $\alpha$<br>(pg/mL) | -0.036                     | 0.158        | -0.086 | 0.014  | 0.053           | 0.040               | -0.041  | 0.275        | -0.114          | 0.032  | 0.052          | 0.039               | -0.057             | 0.211        | -0.147         | 0.032  | 0.052          | 0.039               | -0.045  | 0.204        | -0.113         | 0.024  | 0.052          | 0.039               |
|                          | -0.054                     | 0.084        | -0.115 | 0.007  | 0.029           | 0.016               | -0.079  | 0.075        | -0.167          | 0.008  | 0.030          | 0.016               | -0.013             | 0.811        | -0.122         | 0.095  | 0.026          | 0.012               | -0.074  | 0.079        | -0.156         | 0.008  | 0.030          | 0.016               |
| IL-10<br>(pg/mL)         | -0.023                     | 0.432        | -0.082 | 0.035  | 0.030           | 0.017               | -0.039  | 0.373        | -0.124          | 0.046  | 0.030          | 0.017               | -0.152             | <b>0.004</b> | -0.256         | -0.048 | 0.039          | 0.026               | -0.037  | 0.367        | -0.117         | 0.043  | 0.030          | 0.017               |
|                          | 0.049                      | 0.136        | -0.015 | 0.114  | 0.035           | 0.021               | 0.063   | 0.177        | -0.029          | 0.156  | 0.034          | 0.021               | 0.065              | 0.265        | -0.049         | 0.179  | 0.034          | 0.020               | 0.061   | 0.165        | -0.025         | 0.148  | 0.035          | 0.021               |
| IL-4 (pg/mL)             | 0.054                      | 0.105        | -0.011 | 0.120  | 0.039           | 0.026               | 0.108   | <b>0.027</b> | 0.012           | 0.204  | 0.042          | 0.028               | 0.062              | 0.302        | -0.056         | 0.180  | 0.037          | 0.024               | 0.095   | <b>0.038</b> | 0.005          | 0.185  | 0.041          | 0.028               |
|                          | 0.014                      | 0.767        | -0.078 | 0.106  | 0.039           | 0.026               | 0.037   | 0.578        | -0.094          | 0.169  | 0.040          | 0.026               | -0.223             | <b>0.007</b> | -0.385         | -0.060 | 0.048          | 0.035               | 0.024   | 0.699        | -0.099         | 0.148  | 0.039          | 0.026               |
| TAC ( $\mu$ M)           | -0.012                     | 0.800        | -0.104 | 0.080  | 0.011           | -0.003              | -0.041  | 0.549        | -0.175          | 0.093  | 0.011          | -0.002              | 0.010              | 0.904        | -0.154         | 0.174  | 0.011          | -0.003              | -0.030  | 0.643        | -0.156         | 0.096  | 0.011          | -0.002              |
|                          | 0.046                      | 0.229        | -0.029 | 0.121  | 0.039           | 0.026               | 0.066   | 0.225        | -0.041          | 0.174  | 0.039          | 0.026               | 0.061              | 0.369        | -0.072         | 0.194  | 0.038          | 0.025               | 0.061   | 0.232        | -0.039         | 0.162  | 0.039          | 0.026               |
| MDA ( $\mu$ M)           | 0.097                      | <b>0.015</b> | 0.019  | 0.175  | 0.039           | 0.026               | 0.103   | 0.075        | -0.010          | 0.217  | 0.036          | 0.022               | 0.062              | 0.383        | -0.078         | 0.202  | 0.033          | 0.019               | 0.113   | <b>0.038</b> | 0.006          | 0.220  | 0.037          | 0.024               |
|                          | 0.003                      | 0.908        | -0.055 | 0.062  | 0.027           | 0.013               | -0.016  | 0.706        | -0.099          | 0.067  | 0.027          | 0.013               | -0.019             | 0.712        | -0.122         | 0.083  | 0.027          | 0.013               | -0.012  | 0.762        | -0.090         | 0.066  | 0.027          | 0.013               |
|                          | 0.035                      | 0.203        | -0.019 | 0.088  | 0.020           | 0.006               | 0.040   | 0.316        | -0.038          | 0.118  | 0.019          | 0.005               | -0.065             | 0.183        | -0.160         | 0.031  | 0.020          | 0.006               | 0.040   | 0.283        | -0.033         | 0.113  | 0.019          | 0.005               |
|                          | <b>Lutein + zeaxanthin</b> |              |        |        | <b>Lycopene</b> |                     |         |              | <b>Phytoene</b> |        |                |                     | <b>Phytofluene</b> |              |                |        |                |                     |         |              |                |        |                |                     |
|                          |                            |              | 95% CI |        | R <sup>2</sup>  |                     |         |              | 95% CI          |        | R <sup>2</sup> |                     | 95% CI             |              | R <sup>2</sup> |        |                |                     | 95% CI  |              | R <sup>2</sup> |        |                |                     |
|                          | $\beta$                    | p-value      | Lower  | Upper  | R <sup>2</sup>  | R <sup>2</sup> adj. | $\beta$ | p-value      | Lower           | Upper  | R <sup>2</sup> | R <sup>2</sup> adj. | $\beta$            | p-value      | Lower          | Upper  | R <sup>2</sup> | R <sup>2</sup> adj. | $\beta$ | p-value      | Lower          | Upper  | R <sup>2</sup> | R <sup>2</sup> adj. |
| BMI (kg/m <sup>2</sup> ) | 0.009                      | 0.355        | -0.010 | 0.029  | 0.018           | 0.006               | 0.016   | 0.059        | -0.001          | 0.033  | 0.022          | 0.009               | 0.007              | 0.591        | -0.020         | 0.035  | 0.018          | 0.005               | 0.008   | 0.584        | -0.020         | 0.035  | 0.018          | 0.005               |
|                          | 0.006                      | 0.596        | -0.015 | 0.027  | 0.038           | 0.026               | 0.004   | 0.602        | -0.012          | 0.021  | 0.038          | 0.026               | 0.002              | 0.921        | -0.029         | 0.032  | 0.038          | 0.026               | 0.004   | 0.806        | -0.027         | 0.035  | 0.038          | 0.026               |
| WC (cm)                  | -0.003                     | 0.764        | -0.026 | 0.019  | 0.386           | 0.780               | 0.006   | 0.559        | -0.014          | 0.025  | 0.386          | 0.378               | -0.018             | 0.265        | -0.050         | 0.014  | 0.387          | 0.378               | -0.019  | 0.234        | -0.051         | 0.012  | 0.387          | 0.379               |
|                          | -0.009                     | 0.456        | -0.032 | 0.014  | 0.069           | 0.056               | 0.026   | <b>0.005</b> | 0.008           | 0.044  | 0.077          | 0.065               | 0.015              | 0.372        | -0.018         | 0.048  | 0.069          | 0.056               | 0.012   | 0.474        | -0.021         | 0.045  | 0.069          | 0.056               |
| FBG (mg/dL)              | 0.001                      | 0.915        | -0.025 | 0.027  | 0.012           | -0.002              | -0.008  | 0.477        | -0.030          | 0.014  | 0.012          | -0.001              | 0.006              | 0.738        | -0.030         | 0.042  | 0.012          | -0.002              | 0.008   | 0.679        | -0.028         | 0.044  | 0.012          | -0.002              |
|                          | -0.002                     | 0.856        | -0.026 | 0.022  | 0.013           | -0.001              | 0.027   | <b>0.006</b> | 0.008           | 0.046  | 0.022          | 0.009               | 0.015              | 0.404        | -0.020         | 0.050  | 0.014          | 0.000               | 0.013   | 0.467        | -0.022         | 0.048  | 0.014          | 0.000               |

## ARTICLE

## Journal Name

|                         |        |       |        |       |       |        |        |              |        |        |       |        |        |       |        |       |       |        |        |       |        |       |       |        |
|-------------------------|--------|-------|--------|-------|-------|--------|--------|--------------|--------|--------|-------|--------|--------|-------|--------|-------|-------|--------|--------|-------|--------|-------|-------|--------|
| Insulin<br>(mIU/mL)     | 0.048  | 0.292 | -0.041 | 0.137 | 0.016 | 0.003  | -0.026 | 0.506        | -0.102 | 0.051  | 0.015 | 0.002  | -0.002 | 0.979 | -0.127 | 0.123 | 0.015 | 0.001  | -0.005 | 0.938 | -0.129 | 0.120 | 0.015 | 0.001  |
|                         | 0.002  | 0.961 | -0.086 | 0.090 | 0.014 | 0.000  | 0.071  | <b>0.044</b> | 0.002  | 0.141  | 0.019 | 0.006  | 0.063  | 0.336 | -0.065 | 0.191 | 0.015 | 0.002  | 0.060  | 0.357 | -0.068 | 0.189 | 0.015 | 0.002  |
| HOMA IR<br>(%)          | 0.049  | 0.336 | -0.051 | 0.150 | 0.010 | -0.004 | -0.034 | 0.440        | -0.120 | 0.052  | 0.009 | -0.004 | 0.004  | 0.950 | -0.136 | 0.145 | 0.009 | -0.005 | 0.003  | 0.970 | -0.138 | 0.143 | 0.009 | -0.005 |
|                         | 0.000  | 1.000 | -0.099 | 0.099 | 0.014 | 0.000  | 0.098  | <b>0.014</b> | 0.020  | 0.176  | 0.021 | 0.008  | 0.078  | 0.288 | -0.066 | 0.222 | 0.015 | 0.002  | 0.073  | 0.318 | -0.071 | 0.218 | 0.015 | 0.001  |
| HDL-c<br>(mg/dL)        | 0.018  | 0.370 | -0.021 | 0.056 | 0.019 | 0.005  | 0.018  | 0.287        | -0.015 | 0.051  | 0.020 | 0.006  | 0.046  | 0.090 | -0.007 | 0.100 | 0.022 | 0.008  | 0.044  | 0.103 | -0.009 | 0.098 | 0.021 | 0.008  |
|                         | 0.031  | 0.126 | -0.009 | 0.071 | 0.038 | 0.024  | 0.017  | 0.284        | -0.014 | 0.049  | 0.035 | 0.023  | 0.048  | 0.104 | -0.010 | 0.107 | 0.038 | 0.025  | 0.045  | 0.134 | -0.014 | 0.103 | 0.037 | 0.024  |
| LDL-c<br>(mg/dL)        | -0.016 | 0.432 | -0.056 | 0.024 | 0.015 | 0.001  | -0.031 | 0.078        | -0.065 | 0.003  | 0.018 | 0.004  | -0.022 | 0.439 | -0.078 | 0.034 | 0.015 | 0.001  | -0.018 | 0.522 | -0.074 | 0.037 | 0.015 | 0.001  |
|                         | 0.039  | 0.092 | -0.006 | 0.084 | 0.016 | 0.003  | 0.021  | 0.248        | -0.015 | 0.057  | 0.015 | 0.001  | -0.005 | 0.884 | -0.071 | 0.061 | 0.013 | -0.001 | -0.009 | 0.789 | -0.075 | 0.057 | 0.013 | -0.001 |
| TC (mg/dL)              | -0.005 | 0.741 | -0.034 | 0.024 | 0.013 | -0.001 | -0.010 | 0.404        | -0.035 | 0.014  | 0.014 | 0.000  | -0.005 | 0.804 | -0.045 | 0.035 | 0.013 | -0.001 | -0.002 | 0.918 | -0.042 | 0.038 | 0.013 | -0.001 |
|                         | 0.015  | 0.315 | -0.015 | 0.045 | 0.009 | -0.004 | 0.004  | 0.730        | -0.019 | 0.028  | 0.008 | -0.005 | -0.008 | 0.722 | -0.051 | 0.036 | 0.008 | -0.005 | -0.011 | 0.624 | -0.054 | 0.033 | 0.008 | -0.005 |
| TG (mg/dL)              | 0.003  | 0.933 | -0.068 | 0.075 | 0.018 | 0.004  | 0.000  | 0.996        | -0.061 | 0.061  | 0.018 | 0.004  | -0.004 | 0.933 | -0.104 | 0.096 | 0.018 | 0.004  | -0.001 | 0.992 | -0.100 | 0.099 | 0.018 | 0.004  |
|                         | -0.075 | 0.064 | -0.154 | 0.004 | 0.017 | 0.003  | 0.022  | 0.488        | -0.040 | 0.085  | 0.013 | -0.001 | -0.060 | 0.312 | -0.175 | 0.056 | 0.014 | 0.000  | -0.066 | 0.261 | -0.182 | 0.049 | 0.014 | 0.000  |
| SBP (mmHg)              | -0.016 | 0.135 | -0.037 | 0.005 | 0.008 | -0.006 | -0.004 | 0.662        | -0.022 | 0.014  | 0.005 | -0.009 | -0.005 | 0.722 | -0.035 | 0.024 | 0.005 | -0.009 | -0.007 | 0.650 | -0.036 | 0.023 | 0.005 | -0.009 |
|                         | -0.002 | 0.820 | -0.021 | 0.017 | 0.021 | 0.007  | 0.004  | 0.612        | -0.011 | 0.019  | 0.021 | 0.007  | 0.022  | 0.117 | -0.006 | 0.050 | 0.024 | 0.010  | 0.021  | 0.131 | -0.006 | 0.049 | 0.023 | 0.010  |
| DBP<br>(mmHg)           | -0.013 | 0.197 | -0.033 | 0.007 | 0.012 | -0.002 | -0.007 | 0.417        | -0.024 | 0.010  | 0.011 | -0.003 | -0.018 | 0.205 | -0.046 | 0.010 | 0.012 | -0.002 | -0.017 | 0.228 | -0.045 | 0.011 | 0.012 | -0.002 |
|                         | -0.001 | 0.900 | -0.021 | 0.018 | 0.023 | 0.010  | -0.006 | 0.427        | -0.022 | 0.009  | 0.024 | 0.011  | 0.007  | 0.654 | -0.022 | 0.035 | 0.024 | 0.010  | 0.004  | 0.762 | -0.024 | 0.033 | 0.023 | 0.010  |
| hs-CRP<br>(mg/dL)       | -0.014 | 0.721 | -0.088 | 0.061 | 0.039 | 0.025  | 0.032  | 0.322        | -0.031 | 0.096  | 0.040 | 0.026  | 0.033  | 0.529 | -0.070 | 0.137 | 0.039 | 0.026  | 0.035  | 0.501 | -0.068 | 0.139 | 0.039 | 0.026  |
|                         | -0.039 | 0.315 | -0.114 | 0.037 | 0.034 | 0.020  | 0.004  | 0.893        | -0.055 | 0.063  | 0.033 | 0.019  | 0.028  | 0.619 | -0.082 | 0.137 | 0.033 | 0.020  | 0.034  | 0.544 | -0.076 | 0.144 | 0.033 | 0.020  |
| IL-6 (pg/mL)            | 0.065  | 0.199 | -0.034 | 0.164 | 0.042 | 0.029  | -0.058 | 0.175        | -0.143 | 0.026  | 0.042 | 0.029  | -0.047 | 0.507 | -0.185 | 0.092 | 0.040 | 0.027  | -0.069 | 0.326 | -0.207 | 0.069 | 0.041 | 0.028  |
|                         | -0.077 | 0.139 | -0.180 | 0.025 | 0.027 | 0.014  | -0.086 | <b>0.037</b> | -0.166 | -0.005 | 0.030 | 0.017  | 0.025  | 0.747 | -0.125 | 0.174 | 0.025 | 0.011  | 0.008  | 0.913 | -0.141 | 0.158 | 0.025 | 0.011  |
| IL-1 $\beta$<br>(pg/mL) | 0.014  | 0.755 | -0.073 | 0.100 | 0.023 | 0.009  | -0.022 | 0.557        | -0.096 | 0.052  | 0.023 | 0.010  | -0.054 | 0.376 | -0.175 | 0.066 | 0.024 | 0.010  | -0.075 | 0.221 | -0.195 | 0.045 | 0.025 | 0.011  |

## Food and Function

## Supplementary Tables

|                                           |                     |              |        |        |                |                     |                   |              |        |        |                |                     |                    |         |        |       |                |                     |        |       |        |       |       |        |
|-------------------------------------------|---------------------|--------------|--------|--------|----------------|---------------------|-------------------|--------------|--------|--------|----------------|---------------------|--------------------|---------|--------|-------|----------------|---------------------|--------|-------|--------|-------|-------|--------|
|                                           | -0.088              | <b>0.042</b> | -0.173 | -0.003 | 0.055          | 0.042               | -0.046            | 0.179        | -0.113 | 0.021  | 0.053          | 0.040               | -0.006             | 0.930   | -0.129 | 0.118 | 0.051          | 0.037               | -0.017 | 0.792 | -0.141 | 0.107 | 0.051 | 0.037  |
| <b>TNF-<math>\alpha</math></b><br>(pg/mL) | 0.002               | 0.965        | -0.099 | 0.104  | 0.026          | 0.012               | -0.059            | 0.184        | -0.146 | 0.028  | 0.028          | 0.014               | 0.011              | 0.884   | -0.132 | 0.153 | 0.026          | 0.012               | 0.002  | 0.980 | -0.140 | 0.144 | 0.026 | 0.012  |
|                                           | -0.120              | <b>0.017</b> | -0.218 | -0.021 | 0.036          | 0.023               | -0.133            | <b>0.001</b> | -0.210 | -0.055 | 0.043          | 0.030               | -0.104             | 0.157   | -0.248 | 0.040 | 0.032          | 0.018               | -0.099 | 0.179 | -0.243 | 0.045 | 0.031 | 0.018  |
| <b>IL-10</b><br>(pg/mL)                   | 0.037               | 0.498        | -0.070 | 0.144  | 0.033          | 0.019               | -0.020            | 0.672        | -0.112 | 0.072  | 0.032          | 0.019               | 0.019              | 0.799   | -0.130 | 0.169 | 0.032          | 0.019               | 0.029  | 0.706 | -0.121 | 0.178 | 0.032 | 0.019  |
|                                           | 0.118               | <b>0.038</b> | 0.007  | 0.229  | 0.041          | 0.028               | 0.088             | 0.051        | 0.000  | 0.175  | 0.040          | 0.027               | 0.123              | 0.138   | -0.039 | 0.285 | 0.038          | 0.025               | 0.117  | 0.157 | -0.045 | 0.280 | 0.038 | 0.025  |
| <b>IL-4</b> (pg/mL)                       | -0.026              | 0.738        | -0.179 | 0.127  | 0.039          | 0.026               | 0.031             | 0.640        | -0.100 | 0.162  | 0.039          | 0.026               | -0.138             | 0.205   | -0.351 | 0.076 | 0.041          | 0.028               | -0.136 | 0.210 | -0.349 | 0.077 | 0.041 | 0.028  |
|                                           | -0.044              | 0.581        | -0.199 | 0.112  | 0.011          | -0.002              | 0.022             | 0.727        | -0.101 | 0.145  | 0.011          | -0.003              | 0.028              | 0.808   | -0.199 | 0.255 | 0.011          | -0.003              | 0.021  | 0.856 | -0.206 | 0.248 | 0.011 | -0.003 |
| <b>TAC</b> ( $\mu$ M)                     | 0.132               | <b>0.038</b> | 0.007  | 0.256  | 0.042          | 0.029               | 0.036             | 0.508        | -0.071 | 0.143  | 0.038          | 0.024               | 0.088              | 0.319   | -0.086 | 0.263 | 0.038          | 0.025               | 0.098  | 0.267 | -0.075 | 0.272 | 0.039 | 0.025  |
|                                           | 0.185               | <b>0.006</b> | 0.053  | 0.317  | 0.041          | 0.028               | -0.011            | 0.836        | -0.116 | 0.094  | 0.032          | 0.019               | 0.050              | 0.613   | -0.143 | 0.243 | 0.032          | 0.019               | 0.056  | 0.573 | -0.138 | 0.249 | 0.032 | 0.019  |
| <b>MDA</b> ( $\mu$ M)                     | -0.040              | 0.414        | -0.136 | 0.056  | 0.028          | 0.014               | 0.039             | 0.350        | -0.043 | 0.122  | 0.028          | 0.014               | 0.078              | 0.252   | -0.056 | 0.213 | 0.028          | 0.015               | 0.080  | 0.240 | -0.054 | 0.214 | 0.029 | 0.015  |
|                                           | 0.007               | 0.877        | -0.083 | 0.098  | 0.018          | 0.004               | 0.003             | 0.925        | -0.068 | 0.075  | 0.018          | 0.004               | -0.010             | 0.878   | -0.142 | 0.121 | 0.018          | 0.004               | -0.006 | 0.924 | -0.138 | 0.126 | 0.018 | 0.004  |
|                                           | <b>Violaxanthin</b> |              |        |        |                |                     | <b>Neoxanthin</b> |              |        |        |                |                     | <b>Astaxanthin</b> |         |        |       |                |                     |        |       |        |       |       |        |
|                                           |                     |              | 95% CI |        |                |                     |                   |              | 95% CI |        |                |                     |                    |         | 95% CI |       |                |                     |        |       |        |       |       |        |
|                                           | $\beta$             | p-value      | Lower  | Upper  | R <sup>2</sup> | R <sup>2</sup> adj. | $\beta$           | p-value      | Lower  | Upper  | R <sup>2</sup> | R <sup>2</sup> adj. | $\beta$            | p-value | Lower  | Upper | R <sup>2</sup> | R <sup>2</sup> adj. |        |       |        |       |       |        |
| <b>BMI</b> (kg/m <sup>2</sup> )           | -0.002              | 0.882        | -0.028 | 0.024  | 0.017          | 0.005               | 0.011             | 0.388        | -0.014 | 0.036  | 0.018          | 0.006               | -0.003             | 0.233   | -0.008 | 0.002 | 0.019          | 0.007               |        |       |        |       |       |        |
|                                           | 0.004               | 0.761        | -0.023 | 0.032  | 0.038          | 0.026               | 0.005             | 0.742        | -0.023 | 0.032  | 0.038          | 0.026               | 0.001              | 0.837   | -0.005 | 0.006 | 0.038          | 0.026               |        |       |        |       |       |        |
| <b>WC</b> (cm)                            | -0.003              | 0.832        | -0.033 | 0.027  | 0.386          | 0.377               | -0.009            | 0.526        | -0.039 | 0.020  | 0.386          | 0.378               | -0.001             | 0.743   | -0.007 | 0.005 | 0.386          | 0.378               |        |       |        |       |       |        |
|                                           | 0.000               | 0.981        | -0.029 | 0.030  | 0.068          | 0.055               | 0.000             | 0.994        | -0.030 | 0.029  | 0.068          | 0.055               | -0.001             | 0.646   | -0.007 | 0.004 | 0.069          | 0.056               |        |       |        |       |       |        |
| <b>FBG</b> (mg/dL)                        | -0.019              | 0.267        | -0.053 | 0.015  | 0.013          | -0.001              | -0.029            | 0.090        | -0.062 | 0.004  | 0.015          | 0.002               | -0.003             | 0.336   | -0.009 | 0.003 | 0.013          | -0.001              |        |       |        |       |       |        |
|                                           | -0.007              | 0.670        | -0.038 | 0.024  | 0.013          | 0.000               | -0.007            | 0.657        | -0.038 | 0.024  | 0.013          | 0.000               | 0.001              | 0.640   | -0.004 | 0.007 | 0.013          | 0.000               |        |       |        |       |       |        |
| <b>Insulin</b><br>(mIU/mL)                | 0.125               | <b>0.036</b> | 0.008  | 0.241  | 0.020          | 0.007               | 0.118             | <b>0.043</b> | 0.004  | 0.232  | 0.020          | 0.006               | 0.007              | 0.521   | -0.015 | 0.029 | 0.015          | 0.002               |        |       |        |       |       |        |
|                                           | -0.028              | 0.630        | -0.142 | 0.086  | 0.014          | 0.001               | -0.056            | 0.334        | -0.170 | 0.058  | 0.015          | 0.002               | 0.007              | 0.540   | -0.015 | 0.028 | 0.015          | 0.001               |        |       |        |       |       |        |
| <b>HOMA IR</b><br>(%)                     | 0.106               | 0.116        | -0.026 | 0.237  | 0.012          | -0.002              | 0.089             | 0.174        | -0.040 | 0.218  | 0.011          | -0.003              | 0.004              | 0.748   | -0.021 | 0.029 | 0.009          | -0.005              |        |       |        |       |       |        |

| ARTICLE               | Journal Name |       |        |       |       |        |        |       |        |       |       |        |        |       |        |       |       |        |
|-----------------------|--------------|-------|--------|-------|-------|--------|--------|-------|--------|-------|-------|--------|--------|-------|--------|-------|-------|--------|
| HDL-c (mg/dL)         | -0.035       | 0.593 | -0.163 | 0.093 | 0.014 | 0.001  | -0.063 | 0.332 | -0.191 | 0.065 | 0.015 | 0.001  | 0.008  | 0.509 | -0.016 | 0.032 | 0.014 | 0.001  |
|                       | 0.000        | 0.996 | -0.050 | 0.050 | 0.018 | 0.004  | -0.002 | 0.947 | -0.051 | 0.047 | 0.018 | 0.004  | -0.002 | 0.614 | -0.012 | 0.007 | 0.018 | 0.005  |
| LDL-c (mg/dL)         | 0.022        | 0.406 | -0.030 | 0.074 | 0.036 | 0.022  | 0.013  | 0.612 | -0.039 | 0.065 | 0.035 | 0.022  | 0.006  | 0.222 | -0.004 | 0.016 | 0.036 | 0.023  |
|                       | 0.006        | 0.831 | -0.046 | 0.058 | 0.014 | 0.000  | -0.004 | 0.892 | -0.055 | 0.047 | 0.014 | 0.000  | 0.003  | 0.505 | -0.006 | 0.013 | 0.015 | 0.001  |
| TC (mg/dL)            | 0.024        | 0.420 | -0.035 | 0.083 | 0.014 | 0.000  | 0.018  | 0.553 | -0.041 | 0.076 | 0.013 | 0.000  | -0.001 | 0.860 | -0.012 | 0.010 | 0.013 | -0.001 |
|                       | 0.013        | 0.510 | -0.025 | 0.050 | 0.013 | -0.001 | 0.000  | 0.985 | -0.036 | 0.037 | 0.013 | -0.001 | 0.002  | 0.561 | -0.005 | 0.009 | 0.013 | -0.001 |
| TG (mg/dL)            | -0.015       | 0.447 | -0.054 | 0.024 | 0.009 | -0.005 | -0.018 | 0.355 | -0.057 | 0.020 | 0.009 | -0.004 | -0.004 | 0.280 | -0.011 | 0.003 | 0.010 | -0.004 |
|                       | 0.007        | 0.891 | -0.087 | 0.100 | 0.018 | 0.004  | -0.027 | 0.561 | -0.119 | 0.064 | 0.018 | 0.005  | 0.000  | 0.967 | -0.018 | 0.017 | 0.018 | 0.004  |
| SBP (mmHg)            | -0.102       | 0.052 | -0.204 | 0.001 | 0.017 | 0.003  | -0.071 | 0.171 | -0.174 | 0.031 | 0.015 | 0.001  | -0.014 | 0.170 | -0.033 | 0.006 | 0.015 | 0.001  |
|                       | -0.024       | 0.090 | -0.051 | 0.004 | 0.008 | -0.005 | -0.020 | 0.153 | -0.046 | 0.007 | 0.007 | -0.007 | 0.002  | 0.447 | -0.003 | 0.007 | 0.006 | -0.008 |
| DBP (mmHg)            | -0.010       | 0.426 | -0.035 | 0.015 | 0.021 | 0.008  | -0.016 | 0.207 | -0.040 | 0.009 | 0.023 | 0.009  | -0.001 | 0.614 | -0.006 | 0.003 | 0.021 | 0.007  |
|                       | -0.014       | 0.304 | -0.040 | 0.012 | 0.011 | -0.003 | -0.001 | 0.944 | -0.026 | 0.025 | 0.010 | -0.004 | -0.001 | 0.752 | -0.006 | 0.004 | 0.010 | -0.004 |
| hs-CRP (mg/dL)        | -0.015       | 0.231 | -0.041 | 0.010 | 0.025 | 0.012  | -0.012 | 0.360 | -0.037 | 0.013 | 0.024 | 0.011  | -0.003 | 0.283 | -0.007 | 0.002 | 0.025 | 0.011  |
|                       | 0.017        | 0.730 | -0.080 | 0.114 | 0.039 | 0.025  | 0.007  | 0.885 | -0.088 | 0.102 | 0.039 | 0.025  | -0.005 | 0.576 | -0.023 | 0.013 | 0.039 | 0.026  |
| IL-6 (pg/mL)          | -0.026       | 0.600 | -0.123 | 0.071 | 0.033 | 0.020  | 0.000  | 1.000 | -0.097 | 0.097 | 0.033 | 0.019  | 0.004  | 0.678 | -0.015 | 0.022 | 0.033 | 0.019  |
|                       | -0.004       | 0.949 | -0.134 | 0.125 | 0.040 | 0.027  | 0.002  | 0.979 | -0.125 | 0.129 | 0.040 | 0.026  | 0.006  | 0.640 | -0.019 | 0.030 | 0.040 | 0.027  |
| IL-1 $\beta$ (pg/mL)  | -0.043       | 0.526 | -0.176 | 0.090 | 0.025 | 0.012  | -0.056 | 0.410 | -0.188 | 0.077 | 0.025 | 0.012  | -0.011 | 0.389 | -0.036 | 0.014 | 0.026 | 0.012  |
|                       | -0.043       | 0.455 | -0.156 | 0.070 | 0.024 | 0.010  | -0.014 | 0.807 | -0.124 | 0.097 | 0.023 | 0.009  | -0.002 | 0.830 | -0.024 | 0.019 | 0.023 | 0.009  |
| TNF- $\alpha$ (pg/mL) | -0.090       | 0.107 | -0.200 | 0.020 | 0.054 | 0.041  | -0.101 | 0.072 | -0.210 | 0.009 | 0.054 | 0.041  | -0.016 | 0.125 | -0.037 | 0.005 | 0.053 | 0.040  |
|                       | 0.077        | 0.259 | -0.056 | 0.210 | 0.027 | 0.014  | 0.067  | 0.311 | -0.063 | 0.197 | 0.027 | 0.013  | 0.016  | 0.217 | -0.009 | 0.041 | 0.028 | 0.014  |
| IL-10 (pg/mL)         | -0.076       | 0.243 | -0.204 | 0.052 | 0.031 | 0.017  | -0.047 | 0.472 | -0.175 | 0.081 | 0.030 | 0.016  | 0.000  | 0.983 | -0.024 | 0.024 | 0.029 | 0.016  |
|                       | 0.083        | 0.248 | -0.058 | 0.223 | 0.034 | 0.020  | 0.065  | 0.355 | -0.073 | 0.202 | 0.033 | 0.020  | -0.013 | 0.328 | -0.040 | 0.013 | 0.033 | 0.020  |
|                       | 0.148        | 0.045 | 0.004  | 0.392 | 0.041 | 0.037  | 0.308  | 0.005 | 0.065  | 0.352 | 0.045 | 0.032  | 0.002  | 0.911 | -0.036 | 0.020 | 0.036 | 0.032  |

|                          |        |              |        |       |                |                     |        |              |        |                          |                |                     |        |       |        |       |       |        |
|--------------------------|--------|--------------|--------|-------|----------------|---------------------|--------|--------------|--------|--------------------------|----------------|---------------------|--------|-------|--------|-------|-------|--------|
| IL-4 (pg/mL)             | -0.098 | 0.335        | -0.298 | 0.102 | 0.040          | 0.027               | -0.093 | 0.349        | -0.289 | 0.102                    | 0.040          | 0.027               | -0.015 | 0.424 | -0.053 | 0.022 | 0.040 | 0.027  |
|                          | -0.015 | 0.880        | -0.217 | 0.186 | 0.011          | -0.003              | -0.026 | 0.803        | -0.227 | 0.176                    | 0.011          | -0.003              | -0.019 | 0.324 | -0.057 | 0.019 | 0.012 | -0.001 |
| TAC (µM)                 | 0.239  | <b>0.004</b> | 0.076  | 0.401 | 0.047          | 0.034               | 0.259  | <b>0.001</b> | 0.101  | 0.418                    | 0.050          | 0.036               | 0.003  | 0.831 | -0.027 | 0.034 | 0.037 | 0.024  |
|                          | 0.250  | <b>0.004</b> | 0.080  | 0.421 | 0.042          | 0.029               | 0.311  | <b>0.000</b> | 0.141  | 0.481                    | 0.047          | 0.034               | 0.003  | 0.857 | -0.029 | 0.035 | 0.032 | 0.018  |
| MDA (µM)                 | -0.012 | 0.853        | -0.138 | 0.114 | 0.027          | 0.013               | 0.009  | 0.883        | -0.114 | 0.133                    | 0.027          | 0.013               | 0.011  | 0.371 | -0.013 | 0.034 | 0.028 | 0.014  |
|                          | 0.032  | 0.591        | -0.085 | 0.149 | 0.018          | 0.004               | 0.042  | 0.481        | -0.075 | 0.159                    | 0.018          | 0.005               | 0.001  | 0.917 | -0.021 | 0.023 | 0.018 | 0.004  |
| <b>Non-provitamin A</b>  |        |              |        |       |                |                     |        |              |        | <b>Total carotenoids</b> |                |                     |        |       |        |       |       |        |
| 95% CI                   |        |              |        |       |                |                     |        |              |        | 95% CI                   |                |                     |        |       |        |       |       |        |
|                          | β      | p-value      | Lower  | Upper | R <sup>2</sup> | R <sup>2</sup> adj. | β      | p-value      | Lower  | Upper                    | R <sup>2</sup> | R <sup>2</sup> adj. |        |       |        |       |       |        |
| BMI (kg/m <sup>2</sup> ) | 0.021  | 0.195        | -0.011 | 0.052 | 0.019          | 0.007               | 0.002  | 0.864        | -0.023 | 0.028                    | 0.017          | 0.005               |        |       |        |       |       |        |
|                          | 0.010  | 0.579        | -0.024 | 0.044 | 0.038          | 0.026               | -0.004 | 0.781        | -0.032 | 0.024                    | 0.038          | 0.026               |        |       |        |       |       |        |
| WC (cm)                  | -0.005 | 0.789        | -0.042 | 0.032 | 0.386          | 0.377               | -0.010 | 0.505        | -0.040 | 0.019                    | 0.386          | 0.378               |        |       |        |       |       |        |
|                          | 0.039  | <b>0.035</b> | 0.003  | 0.076 | 0.074          | 0.061               | 0.001  | 0.971        | -0.030 | 0.031                    | 0.068          | 0.055               |        |       |        |       |       |        |
| FBG (mg/dL)              | -0.004 | 0.848        | -0.046 | 0.038 | 0.012          | -0.002              | 0.011  | 0.533        | -0.023 | 0.044                    | 0.012          | -0.002              |        |       |        |       |       |        |
|                          | 0.034  | 0.085        | -0.005 | 0.072 | 0.017          | 0.003               | 0.021  | 0.192        | -0.011 | 0.053                    | 0.015          | 0.001               |        |       |        |       |       |        |
| Insulin (mIU/mL)         | 0.013  | 0.857        | -0.130 | 0.157 | 0.015          | 0.001               | -0.039 | 0.506        | -0.155 | 0.077                    | 0.015          | 0.002               |        |       |        |       |       |        |
|                          | 0.100  | 0.165        | -0.041 | 0.242 | 0.016          | 0.003               | 0.086  | 0.144        | -0.030 | 0.203                    | 0.017          | 0.003               |        |       |        |       |       |        |
| HOMA IR (%)              | 0.009  | 0.912        | -0.153 | 0.171 | 0.009          | -0.005              | -0.029 | 0.668        | -0.159 | 0.102                    | 0.009          | -0.005              |        |       |        |       |       |        |
|                          | 0.134  | 0.097        | -0.024 | 0.292 | 0.017          | 0.004               | 0.108  | 0.105        | -0.023 | 0.238                    | 0.017          | 0.003               |        |       |        |       |       |        |
| HDL-c (mg/dL)            | 0.052  | 0.097        | -0.009 | 0.114 | 0.022          | 0.008               | 0.026  | 0.313        | -0.024 | 0.075                    | 0.019          | 0.006               |        |       |        |       |       |        |
|                          | 0.058  | 0.077        | -0.006 | 0.122 | 0.038          | 0.025               | 0.006  | 0.833        | -0.047 | 0.059                    | 0.035          | 0.021               |        |       |        |       |       |        |
| LDL-c (mg/dL)            | -0.046 | 0.158        | -0.110 | 0.018 | 0.017          | 0.003               | -0.010 | 0.692        | -0.062 | 0.041                    | 0.014          | 0.001               |        |       |        |       |       |        |
|                          | 0.043  | 0.251        | -0.030 | 0.115 | 0.015          | 0.001               | 0.001  | 0.978        | -0.059 | 0.061                    | 0.013          | -0.001              |        |       |        |       |       |        |
| TC (mg/dL)               | -0.011 | 0.631        | -0.057 | 0.035 | 0.013          | -0.001              | 0.002  | 0.937        | -0.036 | 0.039                    | 0.013          | -0.001              |        |       |        |       |       |        |
|                          | 0.004  | 0.864        | -0.044 | 0.052 | 0.008          | -0.005              | -0.007 | 0.726        | -0.046 | 0.032                    | 0.008          | -0.005              |        |       |        |       |       |        |
| TG (mg/dL)               | -0.001 | 0.986        | -0.116 | 0.114 | 0.018          | 0.004               | 0.007  | 0.877        | -0.085 | 0.100                    | 0.018          | 0.004               |        |       |        |       |       |        |
|                          | -0.044 | 0.502        | -0.171 | 0.084 | 0.013          | -0.001              | -0.028 | 0.602        | -0.132 | 0.077                    | 0.013          | -0.001              |        |       |        |       |       |        |
| SBP (mmHg)               | -0.016 | 0.365        | -0.049 | 0.018 | 0.006          | -0.008              | -0.009 | 0.511        | -0.036 | 0.018                    | 0.005          | -0.009              |        |       |        |       |       |        |
|                          | 0.016  | 0.318        | -0.015 | 0.046 | 0.022          | 0.008               | -0.001 | 0.940        | -0.026 | 0.024                    | 0.021          | 0.007               |        |       |        |       |       |        |
| DBP (mmHg)               | -0.024 | 0.140        | -0.056 | 0.008 | 0.012          | -0.001              | -0.005 | 0.728        | -0.030 | 0.021                    | 0.010          | -0.004              |        |       |        |       |       |        |
|                          | -0.005 | 0.747        | -0.037 | 0.026 | 0.023          | 0.010               | -0.017 | 0.206        | -0.042 | 0.009                    | 0.025          | 0.012               |        |       |        |       |       |        |
| hs-CRP (mg/dL)           | 0.041  | 0.502        | -0.078 | 0.160 | 0.039          | 0.026               | 0.077  | 0.115        | -0.019 | 0.174                    | 0.042          | 0.028               |        |       |        |       |       |        |
|                          | 0.002  | 0.975        | -0.119 | 0.123 | 0.033          | 0.019               | 0.029  | 0.563        | -0.070 | 0.128                    | 0.033          | 0.020               |        |       |        |       |       |        |
| IL-6 (pg/mL)             | -0.042 | 0.607        | -0.201 | 0.117 | 0.040          | 0.027               | -0.105 | 0.109        | -0.233 | 0.024                    | 0.043          | 0.030               |        |       |        |       |       |        |
|                          | -0.070 | 0.402        | -0.235 | 0.094 | 0.025          | 0.012               | -0.065 | 0.343        | -0.200 | 0.070                    | 0.026          | 0.012               |        |       |        |       |       |        |
| IL-1 β (pg/mL)           | -0.050 | 0.477        | -0.189 | 0.088 | 0.023          | 0.010               | -0.144 | <b>0.011</b> | -0.255 | -0.032                   | 0.031          | 0.017               |        |       |        |       |       |        |
|                          | -0.082 | 0.340        | -0.218 | 0.055 | 0.052          | 0.020               | -0.070 | 0.160        | -0.191 | 0.022                    | 0.052          | 0.040               |        |       |        |       |       |        |

## ARTICLE

## Journal Name

|                          |        |              |        |        |       |        |        |              |        |        |       |        |
|--------------------------|--------|--------------|--------|--------|-------|--------|--------|--------------|--------|--------|-------|--------|
| TNF- $\alpha$<br>(pg/mL) | -0.018 | 0.828        | -0.181 | 0.145  | 0.026 | 0.012  | -0.099 | 0.141        | -0.231 | 0.033  | 0.028 | 0.015  |
|                          | -0.232 | <b>0.004</b> | -0.390 | -0.074 | 0.039 | 0.026  | -0.135 | <b>0.042</b> | -0.265 | -0.005 | 0.034 | 0.021  |
| IL-10<br>(pg/mL)         | 0.020  | 0.821        | -0.152 | 0.192  | 0.032 | 0.019  | 0.084  | 0.233        | -0.055 | 0.223  | 0.034 | 0.020  |
|                          | 0.195  | <b>0.032</b> | 0.017  | 0.374  | 0.041 | 0.028  | 0.215  | <b>0.004</b> | 0.069  | 0.361  | 0.046 | 0.032  |
| IL-4 (pg/mL)             | -0.071 | 0.568        | -0.317 | 0.174  | 0.040 | 0.026  | 0.025  | 0.805        | -0.173 | 0.223  | 0.039 | 0.026  |
|                          | 0.025  | 0.844        | -0.225 | 0.275  | 0.011 | -0.003 | -0.008 | 0.938        | -0.213 | 0.197  | 0.011 | -0.003 |
| TAC ( $\mu$ M)           | 0.140  | 0.171        | -0.061 | 0.340  | 0.039 | 0.026  | 0.136  | 0.100        | -0.026 | 0.297  | 0.041 | 0.027  |
|                          | 0.122  | 0.262        | -0.091 | 0.334  | 0.033 | 0.020  | 0.186  | <b>0.037</b> | 0.011  | 0.360  | 0.037 | 0.024  |
| MDA ( $\mu$ M)           | 0.080  | 0.312        | -0.075 | 0.234  | 0.028 | 0.015  | 0.016  | 0.803        | -0.109 | 0.141  | 0.027 | 0.013  |
|                          | -0.001 | 0.987        | -0.146 | 0.144  | 0.018 | 0.004  | 0.051  | 0.404        | -0.069 | 0.170  | 0.018 | 0.005  |

\* The First rows for each biomarker show the values for male and the second rows for female participants.

Multiple linear regression models were used to assess the associations between carotenoids and a selected list of biomarkers relevant to cardiometabolic health, inflammatory status, and oxidative stress in male and female participants separately. The model was adjusted for the following variables: age (y), marital status (married/ single/ other), education level (having diploma or low literacy/ higher than diploma), smoking status (yes/no), disease history (yes/no for cardiovascular disease, diabetes, and hypertension) and fruit + vegetable intake. BMI ( $\text{kg}/\text{m}^2$ ) was also included as an explanatory variable, in models where it was not the dependent variable. All continuous variables were log-transformed. Carotenoids were adjusted for total energy intake ( $\mu\text{g}/1000$  kcal) prior to log-transformation.

Statistically significant p-values ( $p < 0.05$ ) are shown in **bold**.

Abbreviations: BMI = body mass index, HDL-c = high-density lipoprotein cholesterol, LDL-c = low-density lipoprotein cholesterol, SBP = systolic blood pressure, DBP = diastolic blood pressure, hs-CRP = high-sensitivity C-reactive protein, IL = interleukin, TNF- $\alpha$  = tumor necrosis factor  $\alpha$ , TAC = total antioxidant capacity, MDA = malondialdehyde.
